# Supplementary material
Source: bioRxiv or medRxiv preprint supplement (https://www.biorxiv.org/highwire/filestream/66567/field_highwire_adjunct_files/0/218396-1.pdf)
Supplement: Supplementary file [file 218396-1.pdf]

# Energetic Evolution of Cellular Transportomes

Behrooz Darbani<sup>1</sup>, Douglas B. Kell<sup>2\*</sup> & Irina Borodina<sup>1\*</sup>

<sup>1</sup>The Novo Nordisk Foundation Center for Biosustainability, Technical University of Denmark, 2800 Lyngby, Denmark,  
<sup>2</sup>School of Chemistry & Manchester Institute of Biotechnology, The University of Manchester, 131 Princess St, Manchester M1 7DN, United Kingdom

**Supplementary Table 1. The list of species with publicly-available data on the ion channels and secondary transporters.**

| Domain of life       | Genus                   | Species                              | Genome size (Mb) | Total number of transporter proteins | Transportome source |
|----------------------|-------------------------|--------------------------------------|------------------|--------------------------------------|---------------------|
| Stramenopile, diatom | <i>Phaeodactylum</i>    | <i>tricornutum</i> CCAP1055/1        | 27.6             | 518                                  | TransportDB         |
| Stramenopile, diatom | <i>Thalassiosira</i>    | <i>pseudonana</i> CCMP1335           | 32.4             | 476                                  | TransportDB         |
| Archaea              | <i>Aciduliprofundum</i> | <i>boonei</i> T469                   | 1.49             | 151                                  | TransportDB         |
| Archaea              | <i>Aeropyrum</i>        | <i>camini</i> SY1JCM12091            | 1.6              | 165                                  | TransportDB         |
| Archaea              | <i>Archaeoglobus</i>    | <i>fulgidus</i> DSM4304              | 2.18             | 203                                  | TransportDB         |
| Archaea              | <i>Archaea</i>          | <i>halophilic</i> DL31               | 3.64             | 316                                  | TransportDB         |
| Archaea              | <i>Acidianus</i>        | <i>hospitalis</i> W1                 | 2.14             | 176                                  | TransportDB         |
| Archaea              | <i>Aeropyrum</i>        | <i>pernix</i> K1                     | 1.67             | 169                                  | TransportDB         |
| Archaea              | <i>Archaeoglobus</i>    | <i>profundus</i> DSM5631             | 1.56             | 127                                  | TransportDB         |
| Archaea              | <i>Acidilobus</i>       | <i>saccharovorans</i> 34515          | 1.50             | 142                                  | TransportDB         |
| Archaea              | <i>Aciduliprofundum</i> | <i>sMAR08339</i>                     | 1.44             | 144                                  | TransportDB         |
| Archaea              | <i>Archaeoglobus</i>    | <i>sulfatcallidus</i> PM701          | 2.08             | 168                                  | TransportDB         |
| Archaea              | <i>Archaeoglobus</i>    | <i>veneficus</i> SNP6                | 1.9              | 161                                  | TransportDB         |
| Archaea              | <i>Candidatus</i>       | <i>caldiarchaeum</i> subterraneum    | 1.68             | 177                                  | TransportDB         |
| Archaea              | <i>Candidatus</i>       | <i>korarchaeum cryptofilum</i> OPF8  | 1.59             | 153                                  | TransportDB         |
| Archaea              | <i>Caldisphaera</i>     | <i>lagunensis</i> DSM15908           | 1.55             | 133                                  | TransportDB         |
| Archaea              | <i>Caldivirga</i>       | <i>maquilingensis</i> IC167          | 2.08             | 176                                  | TransportDB         |
| Archaea              | <i>Candidatus</i>       | <i>methanoregula boonei</i> 6A8      | 2.54             | 200                                  | TransportDB         |
| Archaea              | <i>Candidatus</i>       | <i>nitrosopumilus koreensis</i> AR1  | 1.64             | 75                                   | TransportDB         |
| Archaea              | <i>Candidatus</i>       | <i>nitrosopumilus</i> spAR2          | 1.69             | 84                                   | TransportDB         |
| Archaea              | <i>Candidatus</i>       | <i>nitrososphaera gargensis</i> Ga92 | 2.83             | 140                                  | TransportDB         |
| Archaea              | <i>Cenarchaeum</i>      | <i>symbiosum</i> A                   | 2.05             | 65                                   | TransportDB         |
| Archaea              | <i>Desulfurococcus</i>  | <i>fermentans</i> DSM16532           | 1.38             | 157                                  | TransportDB         |
| Archaea              | <i>Desulfurococcus</i>  | <i>kamchatkensis</i> 1221n           | 1.37             | 156                                  | TransportDB         |
| Archaea              | <i>Desulfurococcus</i>  | <i>mucosus</i> DSM2162               | 1.31             | 159                                  | TransportDB         |
| Archaea              | <i>Ferroplasma</i>      | <i>acidarmanus</i> fer1              | 1.94             | 183                                  | TransportDB         |
| Archaea              | <i>Fervidicoccus</i>    | <i>fontis</i> Kam940                 | 1.32             | 111                                  | TransportDB         |

|         |                             |                                 |      |     |             |
|---------|-----------------------------|---------------------------------|------|-----|-------------|
| Archaea | <i>Ferroglobus</i>          | <i>placidus</i> DSM10642        | 2.2  | 180 | TransportDB |
| Archaea | <i>Halogeometricum</i>      | <i>borinquense</i> DSM11551     | 3.94 | 356 | TransportDB |
| Archaea | <i>Hyperthermus</i>         | <i>butylicus</i> DSM5456        | 1.67 | 137 | TransportDB |
| Archaea | <i>Haloarcula</i>           | <i>hispanica</i> ATCC33960      | 3.89 | 376 | TransportDB |
| Archaea | <i>Haloarcula</i>           | <i>hispanica</i> N601           | 3.9  | 375 | TransportDB |
| Archaea | <i>Halalkalicoccus</i>      | <i>jeotgali</i> B3              | 3.7  | 349 | TransportDB |
| Archaea | <i>Halorubrum</i>           | <i>lacusprofundi</i> ATCC49239  | 3.69 | 301 | TransportDB |
| Archaea | <i>Haloarcula</i>           | <i>marismortui</i> ATCC43049    | 4.27 | 378 | TransportDB |
| Archaea | <i>Haloferax</i>            | <i>mediterranei</i> ATCC33500   | 3.9  | 370 | TransportDB |
| Archaea | <i>Halomicrobium</i>        | <i>mukohataei</i> DSM12286      | 3.33 | 268 | TransportDB |
| Archaea | <i>Halovivax</i>            | <i>ruber</i> XH70               | 3.22 | 263 | TransportDB |
| Archaea | <i>Halobacterium</i>        | <i>salinarum</i> R1             | 2.67 | 214 | TransportDB |
| Archaea | <i>Halobacterium</i>        | <i>sNRC1</i>                    | 2.57 | 201 | TransportDB |
| Archaea | <i>Halorhabdus</i>          | <i>tiamatea</i> SARL4B          | 3.15 | 216 | TransportDB |
| Archaea | <i>Haloterrigena</i>        | <i>turkmenica</i> DSM5511       | 5.44 | 465 | TransportDB |
| Archaea | <i>Halorhabdus</i>          | <i>utahensis</i> DSM12940       | 3.12 | 217 | TransportDB |
| Archaea | <i>Haloferax</i>            | <i>volcanii</i> DS2             | 4.01 | 423 | TransportDB |
| Archaea | <i>Haloquadratum</i>        | <i>walsbyi</i> C23              | 3.26 | 259 | TransportDB |
| Archaea | <i>Haloquadratum</i>        | <i>walsbyi</i> DSM16790         | 3.18 | 268 | TransportDB |
| Archaea | <i>Halopiger</i>            | <i>xanaduensis</i> SH6          | 4.36 | 399 | TransportDB |
| Archaea | <i>Ignisphaera</i>          | <i>aggregans</i> DSM17230       | 1.88 | 175 | TransportDB |
| Archaea | <i>Ignicoccus</i>           | <i>hospitalis</i> KIN41         | 1.3  | 78  | TransportDB |
| Archaea | <i>Methanosarcina</i>       | <i>acetivorans</i> C2A          | 5.75 | 449 | TransportDB |
| Archaea | <i>Methanococcus</i>        | <i>aeolicus</i> Nankai3         | 1.57 | 109 | TransportDB |
| Archaea | <i>Methanocella</i>         | <i>arvoryzae</i> MRE50          | 3.18 | 239 | TransportDB |
| Archaea | <i>Methanosarcina</i>       | <i>barkeri</i> str Fusaro       | 4.87 | 356 | TransportDB |
| Archaea | <i>Methanoregula</i>        | <i>boonei</i> 6A8               | 2.54 | 186 | TransportDB |
| Archaea | <i>Methanoculleus</i>       | <i>bourgensis</i> MS2           | 2.79 | 224 | TransportDB |
| Archaea | <i>Methanococcoides</i>     | <i>burtonii</i> DSM6242         | 2.58 | 187 | TransportDB |
| Archaea | <i>Methanosaeta</i>         | <i>concilii</i> GP6             | 3.03 | 234 | TransportDB |
| Archaea | <i>Methanocella</i>         | <i>conradii</i> HZ254           | 2.38 | 241 | TransportDB |
| Archaea | <i>Metallosphaera</i>       | <i>cuprina</i> Ar4              | 1.84 | 150 | TransportDB |
| Archaea | <i>Methanohalobium</i>      | <i>evestigatum</i> Z7303        | 2.41 | 161 | TransportDB |
| Archaea | <i>Methanocaldococcus</i>   | <i>fervens</i> AG86             | 1.51 | 107 | TransportDB |
| Archaea | <i>Methanothermus</i>       | <i>fervidus</i> DSM2088         | 1.24 | 77  | TransportDB |
| Archaea | <i>Methanoregula</i>        | <i>formicicum</i> SMSP          | 2.82 | 216 | TransportDB |
| Archaea | <i>Methanosaeta</i>         | <i>harundinacea</i> 6Ac         | 2.57 | 190 | TransportDB |
| Archaea | <i>Methanomethylovorans</i> | <i>hollandica</i> DSM15978      | 2.71 | 199 | TransportDB |
| Archaea | <i>Methanospirillum</i>     | <i>hungatei</i> JF1             | 3.54 | 286 | TransportDB |
| Archaea | <i>Methanotorris</i>        | <i>igneus</i> Kol5              | 1.85 | 135 | TransportDB |
| Archaea | <i>Methanocaldococcus</i>   | <i>infernus</i> ME              | 1.33 | 116 | TransportDB |
| Archaea | <i>Methanopyrus</i>         | <i>kandleri</i> AV19            | 1.69 | 67  | TransportDB |
| Archaea | <i>Methanocorpusculum</i>   | <i>labreanum</i> Z              | 1.8  | 181 | TransportDB |
| Archaea | <i>Methanohalophilus</i>    | <i>mahii</i> DSM5219            | 2.01 | 171 | TransportDB |
| Archaea | <i>Methanothermobacter</i>  | <i>marburgensis</i> str Marburg | 1.64 | 113 | TransportDB |
| Archaea | <i>Methanococcus</i>        | <i>maripaludis</i> C5           | 1.79 | 156 | TransportDB |

|         |                              |                                      |      |     |             |
|---------|------------------------------|--------------------------------------|------|-----|-------------|
| Archaea | <i>Methanococcus</i>         | <i>maripaludis</i> C6                | 1.74 | 157 | TransportDB |
| Archaea | <i>Methanococcus</i>         | <i>maripaludis</i> C7                | 1.77 | 166 | TransportDB |
| Archaea | <i>Methanococcus</i>         | <i>maripaludis</i> S2                | 1.66 | 167 | TransportDB |
| Archaea | <i>Methanococcus</i>         | <i>maripaludis</i> X1                | 1.75 | 169 | TransportDB |
| Archaea | <i>Methanoculleus</i>        | <i>marisnigri</i> JR1                | 2.48 | 208 | TransportDB |
| Archaea | <i>Methanosarcina</i>        | <i>mazei</i> Go1                     | 4.1  | 286 | TransportDB |
| Archaea | <i>Methanosarcina</i>        | <i>mazei</i> Tuc01                   | 3.43 | 248 | TransportDB |
| Archaea | <i>Methanothermococcus</i>   | <i>okinawensis</i> IH1               | 1.68 | 105 | TransportDB |
| Archaea | <i>Methanocella</i>          | <i>paludicola</i> SANAE              | 2.96 | 267 | TransportDB |
| Archaea | <i>Methanosphaerula</i>      | <i>palustris</i> E19c                | 2.92 | 223 | TransportDB |
| Archaea | <i>Methanoplanus</i>         | <i>petrolearius</i> DSM11571         | 2.84 | 282 | TransportDB |
| Archaea | <i>Methanobolus</i>          | <i>psychrophilus</i> R15             | 3.07 | 216 | TransportDB |
| Archaea | <i>Methanobrevibacter</i>    | <i>ruminantium</i> M1                | 2.94 | 151 | TransportDB |
| Archaea | <i>Metallosphaera</i>        | <i>sedula</i> DSM5348                | 2.19 | 176 | TransportDB |
| Archaea | <i>Methanobrevibacter</i>    | <i>smithii</i> ATCC35061             | 1.85 | 118 | TransportDB |
| Archaea | <i>Methanobrevibacter</i>    | <i>sAbM4</i>                         | 2.0  | 124 | TransportDB |
| Archaea | <i>Methanobacterium</i>      | <i>sAL21</i>                         | 2.58 | 197 | TransportDB |
| Archaea | <i>Methanocaldococcus</i>    | <i>sFS40622</i>                      | 1.77 | 126 | TransportDB |
| Archaea | <i>Methanobacterium</i>      | <i>sMB1</i>                          | 2.03 | 145 | TransportDB |
| Archaea | <i>Methanomassiliococcus</i> | <i>sMx1Issoire</i>                   | 1.93 | 173 | TransportDB |
| Archaea | <i>Methanocella</i>          | <i>sRC-I</i>                         | 3.18 | 185 | TransportDB |
| Archaea | <i>Methanobacterium</i>      | <i>sSWAN1</i>                        | 2.55 | 184 | TransportDB |
| Archaea | <i>Methanothermobacter</i>   | <i>thermautotrophicus</i> str DeltaH | 1.75 | 117 | TransportDB |
| Archaea | <i>Methanosaeta</i>          | <i>thermophila</i> PT                | 1.88 | 146 | TransportDB |
| Archaea | <i>Methanococcus</i>         | <i>vanniellii</i> SB                 | 1.72 | 138 | TransportDB |
| Archaea | <i>Methanococcus</i>         | <i>voltae</i> A3                     | 1.94 | 134 | TransportDB |
| Archaea | <i>Methanocaldococcus</i>    | <i>vulcanius</i> M7                  | 1.76 | 105 | TransportDB |
| Archaea | <i>Methanosalsum</i>         | <i>zhilinae</i> DSM4017              | 2.14 | 162 | TransportDB |
| Archaea | <i>Nanoarchaeum</i>          | <i>equitans</i> Kin4M                | 0.49 | 22  | TransportDB |
| Archaea | <i>Natronobacterium</i>      | <i>gregoryi</i> SP2                  | 3.79 | 309 | TransportDB |
| Archaea | <i>Natrialba</i>             | <i>magadii</i> ATCC43099             | 4.44 | 351 | TransportDB |
| Archaea | <i>Nitrosopumilus</i>        | <i>maritimus</i> SCM1                | 1.65 | 94  | TransportDB |
| Archaea | <i>Natronomonas</i>          | <i>moolapensis</i> 8811              | 2.91 | 214 | TransportDB |
| Archaea | <i>Natronococcus</i>         | <i>occultus</i> SP4                  | 4.31 | 376 | TransportDB |
| Archaea | <i>Natrinema</i>             | <i>pellirubrum</i> DSM15624          | 4.35 | 335 | TransportDB |
| Archaea | <i>Natronomonas</i>          | <i>pharaonis</i> DSM2160             | 2.75 | 240 | TransportDB |
| Archaea | <i>Natrinema</i>             | <i>sJ72</i>                          | 3.79 | 297 | TransportDB |
| Archaea | <i>Pyrococcus</i>            | <i>abyssi</i> GE5                    | 1.77 | 199 | TransportDB |
| Archaea | <i>Pyrobaculum</i>           | <i>aerophilum</i> str IM2            | 2.22 | 191 | TransportDB |
| Archaea | <i>Pyrobaculum</i>           | <i>arsenaticum</i> DSM13514          | 2.12 | 171 | TransportDB |
| Archaea | <i>Pyrobaculum</i>           | <i>calidifontis</i> JCM11548         | 2.01 | 169 | TransportDB |
| Archaea | <i>Pyrolobus</i>             | <i>fumarii</i> 1A                    | 1.84 | 117 | TransportDB |
| Archaea | <i>Pyrococcus</i>            | <i>furiosus</i> COM1                 | 1.91 | 222 | TransportDB |
| Archaea | <i>Pyrococcus</i>            | <i>furiosus</i> DSM3638              | 1.91 | 224 | TransportDB |
| Archaea | <i>Pyrococcus</i>            | <i>horikoshii</i> OT3                | 1.74 | 191 | TransportDB |
| Archaea | <i>Pyrococcus</i>            | <i>horikoshii</i> (shinkaj) OT3      | 1.74 | 201 | TransportDB |
| Archaea | <i>Pyrobaculum</i>           | <i>islandicum</i> DSM4184            | 1.83 | 168 | TransportDB |

|         |                          |                              |      |     |             |
|---------|--------------------------|------------------------------|------|-----|-------------|
| Archaea | <i>Pyrobaculum</i>       | <i>neutrophilum</i> V24Sta   | 1.77 | 159 | TransportDB |
| Archaea | <i>Pyrobaculum</i>       | <i>oguniense</i> TE7         | 2.45 | 173 | TransportDB |
| Archaea | <i>Pyrobaculum</i>       | <i>s1860</i>                 | 2.47 | 186 | TransportDB |
| Archaea | <i>Pyrococcus</i>        | <i>sNA2</i>                  | 1.86 | 204 | TransportDB |
| Archaea | <i>Pyrococcus</i>        | <i>sST04</i>                 | 1.74 | 193 | TransportDB |
| Archaea | <i>Picrophilus</i>       | <i>torridus</i> DSM9790      | 1.55 | 188 | TransportDB |
| Archaea | <i>Pyrococcus</i>        | <i>yayanosii</i> CH1         | 1.72 | 187 | TransportDB |
| Archaea | <i>Sulfolobus</i>        | <i>acidocaldarius</i> DSM639 | 2.23 | 161 | TransportDB |
| Archaea | <i>Sulfolobus</i>        | <i>acidocaldarius</i> N8     | 2.18 | 155 | TransportDB |
| Archaea | <i>Sulfolobus</i>        | <i>acidocaldarius</i> Ron121 | 2.22 | 160 | TransportDB |
| Archaea | <i>Sulfolobus</i>        | <i>acidocaldarius</i> SUSAZ  | 2.06 | 158 | TransportDB |
| Archaea | <i>Staphylothermus</i>   | <i>hellenicus</i> DSM12710   | 1.58 | 140 | TransportDB |
| Archaea | <i>Sulfolobus</i>        | <i>islandicus</i> HVE104     | 2.66 | 226 | TransportDB |
| Archaea | <i>Sulfolobus</i>        | <i>islandicus</i> LAL141     | 2.47 | 233 | TransportDB |
| Archaea | <i>Sulfolobus</i>        | <i>islandicus</i> LD85       | 2.75 | 223 | TransportDB |
| Archaea | <i>Sulfolobus</i>        | <i>islandicus</i> LS215      | 2.74 | 215 | TransportDB |
| Archaea | <i>Sulfolobus</i>        | <i>islandicus</i> M1425      | 2.61 | 222 | TransportDB |
| Archaea | <i>Sulfolobus</i>        | <i>islandicus</i> M1627      | 2.69 | 225 | TransportDB |
| Archaea | <i>Sulfolobus</i>        | <i>islandicus</i> M164       | 2.59 | 220 | TransportDB |
| Archaea | <i>Sulfolobus</i>        | <i>islandicus</i> REY15A     | 2.52 | 215 | TransportDB |
| Archaea | <i>Sulfolobus</i>        | <i>islandicus</i> YG5714     | 2.70 | 218 | TransportDB |
| Archaea | <i>Sulfolobus</i>        | <i>islandicus</i> YN1551     | 2.85 | 208 | TransportDB |
| Archaea | <i>Staphylothermus</i>   | <i>marinus</i> F1            | 1.57 | 166 | TransportDB |
| Archaea | <i>Sulfolobus</i>        | <i>solfatarius</i> 982       | 2.67 | 206 | TransportDB |
| Archaea | <i>Sulfolobus</i>        | <i>solfatarius</i> P2        | 2.99 | 244 | TransportDB |
| Archaea | <i>Salinarchaeum</i>     | <i>sHarcht</i> Bsk1          | 3.26 | 241 | TransportDB |
| Archaea | <i>Sulfolobus</i>        | <i>tokodaii</i> str 7        | 2.69 | 188 | TransportDB |
| Archaea | <i>Thermoplasma</i>      | <i>acidophilum</i> DSM1728   | 1.56 | 169 | TransportDB |
| Archaea | <i>Thermosphaera</i>     | <i>aggregans</i> DSM11486    | 1.32 | 148 | TransportDB |
| Archaea | <i>Thermoplasmatales</i> | <i>archaeon</i> BRNA1        | 1.46 | 116 | TransportDB |
| Archaea | <i>Thermococcus</i>      | <i>barophilus</i> MP         | 2.06 | 235 | TransportDB |
| Archaea | <i>Thermogladius</i>     | <i>cellulolyticus</i> 1633   | 1.36 | 166 | TransportDB |
| Archaea | <i>Thermococcus</i>      | <i>gammatolerans</i> EJ3     | 2.05 | 217 | TransportDB |
| Archaea | <i>Thermococcus</i>      | <i>kodakarensis</i> KOD1     | 2.09 | 222 | TransportDB |
| Archaea | <i>Thermococcus</i>      | <i>litoralis</i> DSM5473     | 2.22 | 279 | TransportDB |
| Archaea | <i>Thermoproteus</i>     | <i>neutrophilus</i> V24Sta   | 1.77 | 163 | TransportDB |
| Archaea | <i>Thermococcus</i>      | <i>onnurineus</i> NA1        | 1.85 | 217 | TransportDB |
| Archaea | <i>Thermofilum</i>       | <i>pendens</i> Hrk5          | 1.81 | 208 | TransportDB |
| Archaea | <i>Thermococcus</i>      | <i>sibiricus</i> MM739       | 1.85 | 219 | TransportDB |
| Archaea | <i>Thermofilum</i>       | <i>s1910b</i>                | 1.75 | 208 | TransportDB |
| Archaea | <i>Thermococcus</i>      | <i>s4557</i>                 | 2.01 | 233 | TransportDB |
| Archaea | <i>Thermococcus</i>      | <i>sAM4</i>                  | 2.09 | 212 | TransportDB |
| Archaea | <i>Thermococcus</i>      | <i>sCL1</i>                  | 1.95 | 192 | TransportDB |
| Archaea | <i>Thermoproteus</i>     | <i>tenax</i> Kra1            | 1.84 | 163 | TransportDB |
| Archaea | <i>Thermoproteus</i>     | <i>uzoniensis</i> 76820      | 1.94 | 169 | TransportDB |
| Archaea | <i>Thermoplasma</i>      | <i>volcanium</i> GSS1        | 1.58 | 151 | TransportDB |
| Archaea | <i>Vulcanisaeta</i>      | <i>distributa</i> DSM14429   | 2.37 | 169 | TransportDB |
| Archaea | <i>Vulcanisaeta</i>      | <i>moutnovskia</i> 76828     | 2.3  | 173 | TransportDB |

|          |                          |                                                             |      |     |             |
|----------|--------------------------|-------------------------------------------------------------|------|-----|-------------|
| Bacteria | <i>Alicyclobacillus</i>  | <i>acidocaldarius</i> subsp<br><i>acidocaldarius</i> DSM446 | 3.21 | 309 | TransportDB |
| Bacteria | <i>Alicyclobacillus</i>  | <i>acidocaldarius</i> subsp<br><i>acidocaldarius</i> Tc41   | 3.12 | 306 | TransportDB |
| Bacteria | <i>Aggregatibacter</i>   | <i>actinomycetemcomitans</i><br>ANH9381                     | 2.14 | 283 | TransportDB |
| Bacteria | <i>Aggregatibacter</i>   | <i>actinomycetemcomitans</i><br>D11S1                       | 2.20 | 290 | TransportDB |
| Bacteria | <i>Aggregatibacter</i>   | <i>actinomycetemcomitans</i> D7S1                           | 2.31 | 287 | TransportDB |
| Bacteria | <i>Aquifex</i>           | <i>aeolicus</i> VF5                                         | 1.59 | 115 | TransportDB |
| Bacteria | <i>Aggregatibacter</i>   | <i>aphrophilus</i> NJ8700                                   | 2.31 | 276 | TransportDB |
| Bacteria | <i>Acetohalobium</i>     | <i>arabaticum</i> DSM5501                                   | 2.47 | 231 | TransportDB |
| Bacteria | <i>Arthrobacter</i>      | <i>arilaitensis</i> Re117                                   | 3.92 | 399 | TransportDB |
| Bacteria | <i>Aromatoleum</i>       | <i>aromaticum</i> EbN1                                      | 4.73 | 330 | TransportDB |
| Bacteria | <i>Arthrobacter</i>      | <i>aurescens</i> TC1                                        | 5.23 | 590 | TransportDB |
| Bacteria | <i>Acidovorax</i>        | <i>avenae citrulli</i> AAC00-1                              | 5.35 | 534 | TransportDB |
| Bacteria | <i>Acidovorax</i>        | <i>avenae</i> subsp <i>avenae</i><br>ATCC19860              | 5.48 | 636 | TransportDB |
| Bacteria | <i>Acinetobacter</i>     | <i>baumannii</i> 16562                                      | 4.02 | 400 | TransportDB |
| Bacteria | <i>Acinetobacter</i>     | <i>baumannii</i> AB0057                                     | 4.06 | 390 | TransportDB |
| Bacteria | <i>Acinetobacter</i>     | <i>baumannii</i> AB3070294                                  | 3.76 | 385 | TransportDB |
| Bacteria | <i>Acinetobacter</i>     | <i>baumannii</i> ACICU                                      | 4.0  | 404 | TransportDB |
| Bacteria | <i>Acinetobacter</i>     | <i>baumannii</i> ATCC17978                                  | 4.0  | 409 | TransportDB |
| Bacteria | <i>Acinetobacter</i>     | <i>baumannii</i> AYE                                        | 4.05 | 398 | TransportDB |
| Bacteria | <i>Acinetobacter</i>     | <i>baumannii</i> BJAB07104                                  | 4.04 | 407 | TransportDB |
| Bacteria | <i>Acinetobacter</i>     | <i>baumannii</i> BJAB0715                                   | 4.05 | 398 | TransportDB |
| Bacteria | <i>Acinetobacter</i>     | <i>baumannii</i> BJAB0868                                   | 4.01 | 406 | TransportDB |
| Bacteria | <i>Acinetobacter</i>     | <i>baumannii</i> D1279779                                   | 3.71 | 372 | TransportDB |
| Bacteria | <i>Acinetobacter</i>     | <i>baumannii</i> MDRTJ                                      | 4.15 | 406 | TransportDB |
| Bacteria | <i>Acinetobacter</i>     | <i>baumannii</i> MDRZJ06                                    | 4.01 | 401 | TransportDB |
| Bacteria | <i>Acinetobacter</i>     | <i>baumannii</i> SDF                                        | 3.48 | 242 | TransportDB |
| Bacteria | <i>Acinetobacter</i>     | <i>baumannii</i> TCDCAB0715                                 | 4.22 | 406 | TransportDB |
| Bacteria | <i>Acinetobacter</i>     | <i>baumannii</i> TYTH1                                      | 3.96 | 396 | TransportDB |
| Bacteria | <i>Acinetobacter</i>     | <i>baumannii</i> ZW851                                      | 3.88 | 402 | TransportDB |
| Bacteria | <i>Alcanivorax</i>       | <i>borkumensis</i> SK2                                      | 3.12 | 235 | TransportDB |
| Bacteria | <i>Azospirillum</i>      | <i>brasiliense</i> Sp245                                    | 7.53 | 877 | TransportDB |
| Bacteria | <i>Acholeplasma</i>      | <i>brassicae</i>                                            | 1.88 | 236 | TransportDB |
| Bacteria | <i>Arcobacter</i>        | <i>butzleri</i> 7h1h                                        | 2.25 | 217 | TransportDB |
| Bacteria | <i>Arcobacter</i>        | <i>butzleri</i> ED1                                         | 2.26 | 206 | TransportDB |
| Bacteria | <i>Arcobacter</i>        | <i>butzleri</i> RM4018                                      | 2.34 | 218 | TransportDB |
| Bacteria | <i>Acinetobacter</i>     | <i>calcoaceticus</i> ADP1                                   | 3.6  | 355 | TransportDB |
| Bacteria | <i>Acinetobacter</i>     | <i>calcoaceticus</i> PHEA2                                  | 3.86 | 427 | TransportDB |
| Bacteria | <i>Acidithiobacillus</i> | <i>caldus</i> SM1                                           | 3.24 | 231 | TransportDB |
| Bacteria | <i>Acidobacterium</i>    | <i>capsulatum</i> ATCC51196                                 | 4.13 | 255 | TransportDB |
| Bacteria | <i>Azorhizobium</i>      | <i>caulinodans</i> ORS571                                   | 5.37 | 801 | TransportDB |
| Bacteria | <i>Acidothermus</i>      | <i>cellulolyticus</i> 11B                                   | 2.44 | 209 | TransportDB |
| Bacteria | <i>Anaplasma</i>         | <i>centrale</i> str Israel                                  | 1.21 | 78  | TransportDB |
| Bacteria | <i>Arthrobacter</i>      | <i>chlorophenolicus</i> A6                                  | 4.98 | 527 | TransportDB |

|          |                          |                                                       |      |     |             |
|----------|--------------------------|-------------------------------------------------------|------|-----|-------------|
| Bacteria | <i>Acidovorax</i>        | <i>citrulli</i> AAC001                                | 5.35 | 526 | TransportDB |
| Bacteria | <i>Aminobacterium</i>    | <i>colombiense</i> DSM12261                           | 1.98 | 292 | TransportDB |
| Bacteria | <i>Acidiphilium</i>      | <i>cryptum</i> JF5                                    | 3.96 | 407 | TransportDB |
| Bacteria | <i>Anabaena</i>          | <i>cylindrica</i> PCC7122                             | 7.06 | 386 | TransportDB |
| Bacteria | <i>Ammonifex</i>         | <i>degensii</i> KC4                                   | 2.16 | 145 | TransportDB |
| Bacteria | <i>Anaeromyxobacter</i>  | <i>dehalogenans</i> 2CP1                              | 5.03 | 335 | TransportDB |
| Bacteria | <i>Anaeromyxobacter</i>  | <i>dehalogenans</i> 2CPC                              | 5.01 | 332 | TransportDB |
| Bacteria | <i>Alicyclophilus</i>    | <i>denitrificans</i> BC                               | 4.84 | 588 | TransportDB |
| Bacteria | <i>Alicyclophilus</i>    | <i>denitrificans</i> K601                             | 5.07 | 627 | TransportDB |
| Bacteria | <i>Alcanivorax</i>       | <i>dieselolei</i> B5                                  | 4.93 | 476 | TransportDB |
| Bacteria | <i>Acidovorax</i>        | <i>ebreus</i> TPSY                                    | 3.80 | 454 | TransportDB |
| Bacteria | <i>Alkalilimnicola</i>   | <i>ehrlichii</i> MLHE1                                | 3.28 | 279 | TransportDB |
| Bacteria | <i>Adlercreutzia</i>     | <i>equolifaciens</i> DSM19450                         | 2.86 | 234 | TransportDB |
| Bacteria | <i>Asticcacaulis</i>     | <i>excentricus</i> CB48                               | 4.31 | 268 | TransportDB |
| Bacteria | <i>Acidaminococcus</i>   | <i>fermentans</i> DSM20731                            | 2.33 | 268 | TransportDB |
| Bacteria | <i>Acidithiobacillus</i> | <i>ferrivorans</i> SS3                                | 3.21 | 218 | TransportDB |
| Bacteria | <i>Acidithiobacillus</i> | <i>ferrooxidans</i> ATCC23270                         | 2.98 | 226 | TransportDB |
| Bacteria | <i>Acidithiobacillus</i> | <i>ferrooxidans</i> ATCC53993                         | 2.89 | 228 | TransportDB |
| Bacteria | <i>Acidimicrobium</i>    | <i>ferrooxidans</i> DSM10331                          | 2.16 | 172 | TransportDB |
| Bacteria | <i>Alistipes</i>         | <i>fingoldii</i> DSM17242                             | 3.73 | 161 | TransportDB |
| Bacteria | <i>Anoxybacillus</i>     | <i>flavithermus</i> WK1                               | 2.85 | 299 | TransportDB |
| Bacteria | <i>Actinoplanes</i>      | <i>friulensis</i> DSM7358                             | 9.38 | 817 | TransportDB |
| Bacteria | <i>Arcanobacterium</i>   | <i>haemolyticum</i> DSM20595                          | 1.99 | 246 | TransportDB |
| Bacteria | <i>Aeromonas</i>         | <i>hydrophila</i> ML09119                             | 5.02 | 565 | TransportDB |
| Bacteria | <i>Aeromonas</i>         | <i>hydrophila</i> subsp <i>hydrophila</i><br>ATCC7966 | 4.74 | 554 | TransportDB |
| Bacteria | <i>Acidaminococcus</i>   | <i>intestini</i> RyCMR95                              | 2.49 | 273 | TransportDB |
| Bacteria | <i>Advenella</i>         | <i>kashmirensis</i> WT001                             | 4.42 | 625 | TransportDB |
| Bacteria | <i>Acholeplasma</i>      | <i>laidlawii</i> PG8A                                 | 1.5  | 172 | TransportDB |
| Bacteria | <i>Azospirillum</i>      | <i>lipoferum</i> 4B                                   | 6.85 | 751 | TransportDB |
| Bacteria | <i>Alteromonas</i>       | <i>macleodii</i> AltDE1                               | 4.95 | 313 | TransportDB |
| Bacteria | <i>Alteromonas</i>       | <i>macleodii</i> ATCC27126                            | 4.65 | 304 | TransportDB |
| Bacteria | <i>Alteromonas</i>       | <i>macleodii</i> str Aegean Sea<br>MED64              | 4.4  | 300 | TransportDB |
| Bacteria | <i>Alteromonas</i>       | <i>macleodii</i> str Balearic Sea<br>AD45             | 4.67 | 298 | TransportDB |
| Bacteria | <i>Alteromonas</i>       | <i>macleodii</i> str Black Sea11                      | 4.48 | 301 | TransportDB |
| Bacteria | <i>Alteromonas</i>       | <i>macleodii</i> str Deepecotype                      | 4.45 | 298 | TransportDB |
| Bacteria | <i>Alteromonas</i>       | <i>macleodii</i> str English Channel<br>615           | 4.58 | 245 | TransportDB |
| Bacteria | <i>Alteromonas</i>       | <i>macleodii</i> str English<br>Channel673            | 4.6  | 314 | TransportDB |
| Bacteria | <i>Alteromonas</i>       | <i>macleodii</i> str Ionian SeaU4                     | 4.62 | 309 | TransportDB |
| Bacteria | <i>Alteromonas</i>       | <i>macleodii</i> str Ionian SeaU7                     | 4.44 | 293 | TransportDB |
| Bacteria | <i>Alteromonas</i>       | <i>macleodii</i> str Ionian SeaU8                     | 4.4  | 300 | TransportDB |
| Bacteria | <i>Alteromonas</i>       | <i>macleodii</i> str Ionian SeaUM4b                   | 4.44 | 302 | TransportDB |
| Bacteria | <i>Alteromonas</i>       | <i>macleodii</i> str Ionian SeaUM7                    | 4.93 | 309 | TransportDB |
| Bacteria | <i>Anaplasma</i>         | <i>marginale</i> str Dawn                             | 1.2  | 60  | TransportDB |

|          |                       |                                                     |       |      |             |
|----------|-----------------------|-----------------------------------------------------|-------|------|-------------|
| Bacteria | <i>Anaplasma</i>      | <i>marginale</i> str Florida                        | 1.2   | 77   | TransportDB |
| Bacteria | <i>Anaplasma</i>      | <i>marginale</i> str Gypsy Plains                   | 1.2   | 65   | TransportDB |
| Bacteria | <i>Anaplasma</i>      | <i>marginale</i> str StMaries                       | 1.2   | 77   | TransportDB |
| Bacteria | <i>Acaryochloris</i>  | <i>marina</i> MBIC11017                             | 8.36  | 416  | TransportDB |
| Bacteria | <i>Amycolatopsis</i>  | <i>mediterranei</i> RB                              | 10.25 | 799  | TransportDB |
| Bacteria | <i>Amycolatopsis</i>  | <i>mediterranei</i> S699                            | 10.25 | 802  | TransportDB |
| Bacteria | <i>Amycolatopsis</i>  | <i>mediterranei</i> U32                             | 10.24 | 800  | TransportDB |
| Bacteria | <i>Alkaliphilus</i>   | <i>metalliredigens</i> QYMF                         | 4.93  | 545  | TransportDB |
| Bacteria | <i>Actinosynnema</i>  | <i>mirum</i> DSM43827                               | 8.25  | 633  | TransportDB |
| Bacteria | <i>Actinoplanes</i>   | <i>missouriensis</i> 431                            | 8.77  | 741  | TransportDB |
| Bacteria | <i>Anaerobaculum</i>  | <i>mobile</i> DSM13181                              | 2.16  | 296  | TransportDB |
| Bacteria | <i>Akkermansia</i>    | <i>muciniphila</i> ATCCBAA835                       | 2.66  | 164  | TransportDB |
| Bacteria | <i>Acidiphilium</i>   | <i>multivorum</i> AIU301                            | 4.21  | 420  | TransportDB |
| Bacteria | <i>Arcobacter</i>     | <i>nitrofigilis</i> DSM7299                         | 3.19  | 385  | TransportDB |
| Bacteria | <i>Acinetobacter</i>  | <i>oleivorans</i> DR1                               | 4.15  | 436  | TransportDB |
| Bacteria | <i>Alkaliphilus</i>   | <i>oremlandii</i> OhILAs                            | 3.12  | 359  | TransportDB |
| Bacteria | <i>Amycolatopsis</i>  | <i>orientalis</i> HCCB10007                         | 8.95  | 760  | TransportDB |
| Bacteria | <i>Acholeplasma</i>   | <i>palmae</i> J233                                  | 1.55  | 180  | TransportDB |
| Bacteria | <i>Atopobium</i>      | <i>parvulum</i> DSM20469                            | 1.54  | 200  | TransportDB |
| Bacteria | <i>Acetobacter</i>    | <i>pasteurianus</i> 386B                            | 3.06  | 266  | TransportDB |
| Bacteria | <i>Acetobacter</i>    | <i>pasteurianus</i> IFO328301                       | 3.34  | 284  | TransportDB |
| Bacteria | <i>Acetobacter</i>    | <i>pasteurianus</i> IFO32830142C                    | 3.25  | 275  | TransportDB |
| Bacteria | <i>Acetobacter</i>    | <i>pasteurianus</i> IFO328303                       | 3.34  | 283  | TransportDB |
| Bacteria | <i>Acetobacter</i>    | <i>pasteurianus</i> IFO328307                       | 3.34  | 284  | TransportDB |
| Bacteria | <i>Acetobacter</i>    | <i>pasteurianus</i> IFO328312                       | 3.34  | 283  | TransportDB |
| Bacteria | <i>Acetobacter</i>    | <i>pasteurianus</i> IFO328322                       | 3.34  | 284  | TransportDB |
| Bacteria | <i>Acetobacter</i>    | <i>pasteurianus</i> IFO328326                       | 3.34  | 283  | TransportDB |
| Bacteria | <i>Acetobacter</i>    | <i>pasteurianus</i> IFO328332                       | 3.34  | 284  | TransportDB |
| Bacteria | <i>Anaplasma</i>      | <i>phagocytophilum</i> HZ                           | 1.47  | 73   | TransportDB |
| Bacteria | <i>Anaplasma</i>      | <i>phagocytophilum</i> str Dog2                     | 1.47  | 78   | TransportDB |
| Bacteria | <i>Anaplasma</i>      | <i>phagocytophilum</i> str HZ2                      | 1.48  | 79   | TransportDB |
| Bacteria | <i>Anaplasma</i>      | <i>phagocytophilum</i> str JM                       | 1.48  | 78   | TransportDB |
| Bacteria | <i>Arthrobacter</i>   | <i>phenanthrenivorans</i> Sphe3                     | 4.54  | 509  | TransportDB |
| Bacteria | <i>Arthrospira</i>    | <i>platensis</i> NIES39                             | 6.79  | 286  | TransportDB |
| Bacteria | <i>Actinobacillus</i> | <i>pleuropneumoniae</i> serovar3<br>str JL03        | 2.24  | 279  | TransportDB |
| Bacteria | <i>Actinobacillus</i> | <i>pleuropneumoniae</i> serovar5b<br>str L20        | 2.27  | 283  | TransportDB |
| Bacteria | <i>Actinobacillus</i> | <i>pleuropneumoniae</i> serovar7<br>str AP76        | 2.35  | 290  | TransportDB |
| Bacteria | <i>Anaerococcus</i>   | <i>prevotii</i> DSM20548                            | 2.0   | 299  | TransportDB |
| Bacteria | <i>Agrobacterium</i>  | <i>radiobacter</i> K84                              | 7.27  | 1291 | TransportDB |
| Bacteria | <i>Aliivibrio</i>     | <i>salmonicida</i> LF11238                          | 4.66  | 413  | TransportDB |
| Bacteria | <i>Aeromonas</i>      | <i>salmonicida</i> subsp<br><i>salmonicida</i> A449 | 5.04  | 531  | TransportDB |
| Bacteria | <i>Alistipes</i>      | <i>shahii</i> WAL8301                               | 3.76  | 132  | TransportDB |
| Bacteria | <i>Anabaena</i>       | <i>s90</i>                                          | 5.31  | 280  | TransportDB |
| Bacteria | <i>Acinetobacter</i>  | <i>sADP1</i>                                        | 3.6   | 367  | TransportDB |

|          |                         |                                          |      |      |             |
|----------|-------------------------|------------------------------------------|------|------|-------------|
| Bacteria | <i>Azospirillum</i>     | sB510                                    | 7.6  | 858  | TransportDB |
| Bacteria | <i>Azoarcus</i>         | sBH72                                    | 4.38 | 406  | TransportDB |
| Bacteria | <i>Azoarcus</i>         | sEbN1                                    | 4.3  | 297  | TransportDB |
| Bacteria | <i>Arthrobacter</i>     | sFB24                                    | 5.07 | 577  | TransportDB |
| Bacteria | <i>Anaeromyxobacter</i> | sFw1095                                  | 5.28 | 334  | TransportDB |
| Bacteria | <i>Agrobacterium</i>    | sH133                                    | 5.57 | 925  | TransportDB |
| Bacteria | <i>Acidovorax</i>       | sJS42                                    | 4.59 | 459  | TransportDB |
| Bacteria | <i>Anaeromyxobacter</i> | sK                                       | 5.06 | 335  | TransportDB |
| Bacteria | <i>Azoarcus</i>         | sKH32C                                   | 5.82 | 526  | TransportDB |
| Bacteria | <i>Acidovorax</i>       | sKKS102                                  | 5.2  | 620  | TransportDB |
| Bacteria | <i>Arcobacter</i>       | sL                                       | 2.95 | 289  | TransportDB |
| Bacteria | <i>Actinoplanes</i>     | sN902109                                 | 9.23 | 679  | TransportDB |
| Bacteria | <i>Arthrobacter</i>     | sRue61a                                  | 5.08 | 621  | TransportDB |
| Bacteria | <i>Actinoplanes</i>     | sSE50110                                 | 9.24 | 645  | TransportDB |
| Bacteria | <i>Alteromonas</i>      | sSN2                                     | 4.97 | 327  | TransportDB |
| Bacteria | <i>Amycolicococcus</i>  | subflavus DQS39A1                        | 4.86 | 458  | TransportDB |
| Bacteria | <i>Aequorivita</i>      | sublithincola DSM14238                   | 3.52 | 188  | TransportDB |
| Bacteria | <i>Actinobacillus</i>   | succinogenes 130Z                        | 2.32 | 308  | TransportDB |
| Bacteria | <i>Actinobacillus</i>   | suis H910380                             | 2.48 | 315  | TransportDB |
| Bacteria | <i>Anaerolinea</i>      | thermophila UNI1                         | 3.53 | 350  | TransportDB |
| Bacteria | <i>Agrobacterium</i>    | tumefaciens str C58                      | 5.67 | 958  | TransportDB |
| Bacteria | <i>Aerococcus</i>       | urinae ACS120VCol10a                     | 2.08 | 279  | TransportDB |
| Bacteria | <i>Anabaena</i>         | variabilis ATCC29413                     | 7.11 | 467  | TransportDB |
| Bacteria | <i>Aeromonas</i>        | veronii B565                             | 4.55 | 516  | TransportDB |
| Bacteria | <i>Azotobacter</i>      | vinelandii CA                            | 5.37 | 516  | TransportDB |
| Bacteria | <i>Azotobacter</i>      | vinelandii CA6                           | 5.32 | 505  | TransportDB |
| Bacteria | <i>Azotobacter</i>      | vinelandii DJ                            | 5.37 | 516  | TransportDB |
| Bacteria | <i>Allochromatium</i>   | vinosum DSM180                           | 3.67 | 266  | TransportDB |
| Bacteria | <i>Agrobacterium</i>    | vitis S4                                 | 6.32 | 910  | TransportDB |
| Bacteria | <i>Acetobacterium</i>   | woodii DSM1030                           | 4.04 | 426  | TransportDB |
| Bacteria | <i>Amphibacillus</i>    | xylanus NBRC15112                        | 2.57 | 289  | TransportDB |
| Bacteria | <i>Achromobacter</i>    | xylosoxidans A8                          | 7.36 | 1160 | TransportDB |
| Bacteria | <i>Achromobacter</i>    | xylosoxidans<br>NBRC15126ATCC27061       | 6.68 | 914  | TransportDB |
| Bacteria | <i>Achromobacter</i>    | xylosoxidans NH447841996                 | 6.92 | 1014 | TransportDB |
| Bacteria | <i>Aster</i>            | yellows witches broom<br>phytoplasmaAYWB | 0.72 | 55   | TransportDB |
| Bacteria | <i>Brucella</i>         | abortus A13334                           | 3.29 | 489  | TransportDB |
| Bacteria | <i>Brucella</i>         | abortus bv1str 9941                      | 3.29 | 415  | TransportDB |
| Bacteria | <i>Brucella</i>         | abortus S19                              | 3.28 | 448  | TransportDB |
| Bacteria | <i>Bifidobacterium</i>  | adolescentis ATCC15703                   | 2.09 | 248  | TransportDB |
| Bacteria | <i>Borrelia</i>         | afzelii HLJ01                            | 0.91 | 92   | TransportDB |
| Bacteria | <i>Borrelia</i>         | afzelii PKo                              | 1.23 | 97   | TransportDB |
| Bacteria | <i>Burkholderia</i>     | ambifaria AMMD                           | 7.53 | 843  | TransportDB |
| Bacteria | <i>Burkholderia</i>     | ambifaria MC406                          | 7.64 | 821  | TransportDB |
| Bacteria | <i>Bacillus</i>         | amyloliquefaciens CC178                  | 3.92 | 474  | TransportDB |
| Bacteria | <i>Bacillus</i>         | amyloliquefaciens DSM7                   | 3.98 | 470  | TransportDB |
| Bacteria | <i>Bacillus</i>         | amyloliquefaciens FZB42                  | 3.92 | 485  | TransportDB |

|          |                        |                                                        |      |     |             |
|----------|------------------------|--------------------------------------------------------|------|-----|-------------|
| Bacteria | <i>Bacillus</i>        | <i>amyloliquefaciens</i> IT45                          | 3.94 | 480 | TransportDB |
| Bacteria | <i>Bacillus</i>        | <i>amyloliquefaciens</i> LFB112                        | 3.94 | 477 | TransportDB |
| Bacteria | <i>Bacillus</i>        | <i>amyloliquefaciens</i> LL3                           | 4.0  | 467 | TransportDB |
| Bacteria | <i>Bacillus</i>        | <i>amyloliquefaciens</i> subsp<br>plantarum AS433      | 3.96 | 480 | TransportDB |
| Bacteria | <i>Bacillus</i>        | <i>amyloliquefaciens</i> subsp<br>plantarum CAUB946    | 4.02 | 481 | TransportDB |
| Bacteria | <i>Bacillus</i>        | <i>amyloliquefaciens</i> subsp<br>plantarum NAUB3      | 4.20 | 502 | TransportDB |
| Bacteria | <i>Bacillus</i>        | <i>amyloliquefaciens</i> subsp<br>plantarum UCMB5033   | 4.07 | 475 | TransportDB |
| Bacteria | <i>Bacillus</i>        | <i>amyloliquefaciens</i> subsp<br>plantarum UCMB5036   | 3.91 | 482 | TransportDB |
| Bacteria | <i>Bacillus</i>        | <i>amyloliquefaciens</i> subsp<br>plantarum UCMB5113   | 3.89 | 476 | TransportDB |
| Bacteria | <i>Bacillus</i>        | <i>amyloliquefaciens</i> subsp<br>plantarum YAUB9601Y2 | 4.24 | 500 | TransportDB |
| Bacteria | <i>Bacillus</i>        | <i>amyloliquefaciens</i> TA208                         | 3.94 | 473 | TransportDB |
| Bacteria | <i>Bacillus</i>        | <i>amyloliquefaciens</i> XH7                           | 3.94 | 470 | TransportDB |
| Bacteria | <i>Bacillus</i>        | <i>amyloliquefaciens</i> Y2                            | 4.24 | 490 | TransportDB |
| Bacteria | <i>Bifidobacterium</i> | <i>animalis</i> subsp <i>animalis</i><br>ATCC25527     | 1.93 | 205 | TransportDB |
| Bacteria | <i>Bifidobacterium</i> | <i>animalis</i> subsp <i>lactis</i> AD011              | 1.93 | 208 | TransportDB |
| Bacteria | <i>Bifidobacterium</i> | <i>animalis</i> subsp <i>lactis</i><br>ATCC27673       | 1.96 | 211 | TransportDB |
| Bacteria | <i>Bifidobacterium</i> | <i>animalis</i> subsp <i>lactis</i> B420               | 1.94 | 214 | TransportDB |
| Bacteria | <i>Bifidobacterium</i> | <i>animalis</i> subsp <i>lactis</i> BB12               | 1.94 | 206 | TransportDB |
| Bacteria | <i>Bifidobacterium</i> | <i>animalis</i> subsp <i>lactis</i> Bi07               | 1.94 | 216 | TransportDB |
| Bacteria | <i>Bifidobacterium</i> | <i>animalis</i> subsp <i>lactis</i> BI04               | 1.94 | 214 | TransportDB |
| Bacteria | <i>Bifidobacterium</i> | <i>animalis</i> subsp <i>lactis</i> BI12               | 1.94 | 211 | TransportDB |
| Bacteria | <i>Bifidobacterium</i> | <i>animalis</i> subsp <i>lactis</i> BLC1               | 1.94 | 212 | TransportDB |
| Bacteria | <i>Bifidobacterium</i> | <i>animalis</i> subsp <i>lactis</i><br>CNCMI2494       | 1.94 | 206 | TransportDB |
| Bacteria | <i>Bifidobacterium</i> | <i>animalis</i> subsp <i>lactis</i><br>DSM10140        | 1.94 | 213 | TransportDB |
| Bacteria | <i>Bifidobacterium</i> | <i>animalis</i> subsp <i>lactis</i> V9                 | 1.94 | 215 | TransportDB |
| Bacteria | <i>Bacillus</i>        | <i>anthracis</i> str A0248                             | 5.5  | 633 | TransportDB |
| Bacteria | <i>Bacillus</i>        | <i>anthracis</i> str Ames                              | 5.23 | 628 | TransportDB |
| Bacteria | <i>Bacillus</i>        | <i>anthracis</i> str Ames Ancestor                     | 5.5  | 637 | TransportDB |
| Bacteria | <i>Bacillus</i>        | <i>anthracis</i> str CDC684                            | 5.51 | 721 | TransportDB |
| Bacteria | <i>Bacillus</i>        | <i>anthracis</i> str H9401                             | 5.5  | 713 | TransportDB |
| Bacteria | <i>Bacillus</i>        | <i>anthracis</i> str Sterne                            | 5.23 | 704 | TransportDB |
| Bacteria | <i>Buchnera</i>        | <i>aphidicola</i> str 5A<br><i>Acyrtosiphon pisum</i>  | 0.64 | 38  | TransportDB |
| Bacteria | <i>Buchnera</i>        | <i>aphidicola</i> str Ak<br><i>Acyrtosiphon kondoi</i> | 0.65 | 40  | TransportDB |
| Bacteria | <i>Buchnera</i>        | <i>aphidicola</i> str APS<br><i>Acyrtosiphon pisum</i> | 0.66 | 39  | TransportDB |
| Bacteria | <i>Buchnera</i>        | <i>aphidicola</i> str Bp<br><i>Baizongjapistaciae</i>  | 0.62 | 36  | TransportDB |

|          |                        |                                                          |      |     |             |
|----------|------------------------|----------------------------------------------------------|------|-----|-------------|
| Bacteria | <i>Buchnera</i>        | <i>aphidicola</i> str JF98<br><i>Acyrtosiphon pisum</i>  | 0.64 | 27  | TransportDB |
| Bacteria | <i>Buchnera</i>        | <i>aphidicola</i> str JF99<br><i>Acyrtosiphon pisum</i>  | 0.64 | 39  | TransportDB |
| Bacteria | <i>Buchnera</i>        | <i>aphidicola</i> str LL01<br><i>Acyrtosiphon pisum</i>  | 0.64 | 38  | TransportDB |
| Bacteria | <i>Buchnera</i>        | <i>aphidicola</i> str Sg <i>Schizaphis graminum</i>      | 0.64 | 44  | TransportDB |
| Bacteria | <i>Buchnera</i>        | <i>aphidicola</i> str TLW03<br><i>Acyrtosiphon pisum</i> | 0.64 | 36  | TransportDB |
| Bacteria | <i>Buchnera</i>        | <i>aphidicola</i> str Tuc7<br><i>Acyrtosiphon pisum</i>  | 0.64 | 38  | TransportDB |
| Bacteria | <i>Buchnera</i>        | <i>aphidicola</i> str Ua <i>Uroleucon ambrosiae</i>      | 0.63 | 39  | TransportDB |
| Bacteria | <i>Bifidobacterium</i> | <i>asteroides</i> PRL2011                                | 2.17 | 283 | TransportDB |
| Bacteria | <i>Bacillus</i>        | <i>atrophaeus</i> 1942                                   | 4.17 | 504 | TransportDB |
| Bacteria | <i>Bartonella</i>      | <i>australis</i> Aust NH1                                | 1.6  | 143 | TransportDB |
| Bacteria | <i>Bordetella</i>      | <i>avium</i> 197N                                        | 3.73 | 482 | TransportDB |
| Bacteria | <i>Bartonella</i>      | <i>bacilliformis</i> KC583                               | 1.45 | 125 | TransportDB |
| Bacteria | <i>Bdellovibrio</i>    | <i>bacteriovorus</i> HD100                               | 3.78 | 284 | TransportDB |
| Bacteria | <i>Bdellovibrio</i>    | <i>bacteriovorus</i> str Tiberius                        | 3.99 | 284 | TransportDB |
| Bacteria | <i>Bellella</i>        | <i>baltica</i> DSM15883                                  | 4.20 | 211 | TransportDB |
| Bacteria | <i>Bifidobacterium</i> | <i>bifidum</i> BGN4                                      | 2.22 | 197 | TransportDB |
| Bacteria | <i>Bifidobacterium</i> | <i>bifidum</i> PRL2010                                   | 2.21 | 194 | TransportDB |
| Bacteria | <i>Bifidobacterium</i> | <i>bifidum</i> S17                                       | 2.19 | 193 | TransportDB |
| Bacteria | <i>Borrelia</i>        | <i>bissettii</i> DN127                                   | 1.4  | 95  | TransportDB |
| Bacteria | <i>Bifidobacterium</i> | <i>breve</i> ACS071V Sch8b                               | 2.33 | 304 | TransportDB |
| Bacteria | <i>Bifidobacterium</i> | <i>breve</i> UCC2003                                     | 2.42 | 303 | TransportDB |
| Bacteria | <i>Brevibacillus</i>   | <i>brevis</i> NBRC100599                                 | 6.3  | 765 | TransportDB |
| Bacteria | <i>Bordetella</i>      | <i>bronchiseptica</i> 253                                | 5.26 | 877 | TransportDB |
| Bacteria | <i>Bordetella</i>      | <i>bronchiseptica</i> MO149                              | 5.09 | 872 | TransportDB |
| Bacteria | <i>Bordetella</i>      | <i>bronchiseptica</i> RB50                               | 5.34 | 889 | TransportDB |
| Bacteria | <i>Borrelia</i>        | <i>burgdorferi</i> B31                                   | 1.52 | 86  | TransportDB |
| Bacteria | <i>Borrelia</i>        | <i>burgdorferi</i> CA382                                 | 0.91 | 86  | TransportDB |
| Bacteria | <i>Borrelia</i>        | <i>burgdorferi</i> JD1                                   | 1.53 | 95  | TransportDB |
| Bacteria | <i>Borrelia</i>        | <i>burgdorferi</i> N40                                   | 1.34 | 96  | TransportDB |
| Bacteria | <i>Borrelia</i>        | <i>burgdorferi</i> ZS7                                   | 1.35 | 90  | TransportDB |
| Bacteria | <i>Brucella</i>        | <i>canis</i> ATCC23365                                   | 3.31 | 440 | TransportDB |
| Bacteria | <i>Brucella</i>        | <i>canis</i> HSKA52141                                   | 3.28 | 467 | TransportDB |
| Bacteria | <i>Beutenbergia</i>    | <i>cavernae</i> DSM12333                                 | 4.67 | 635 | TransportDB |
| Bacteria | <i>Bacillus</i>        | <i>cellulosilyticus</i> DSM2522                          | 4.68 | 458 | TransportDB |
| Bacteria | <i>Burkholderia</i>    | <i>cenoecepa</i> AU1054                                  | 7.28 | 905 | TransportDB |
| Bacteria | <i>Burkholderia</i>    | <i>cenoecepa</i> HI2424                                  | 7.7  | 945 | TransportDB |
| Bacteria | <i>Burkholderia</i>    | <i>cenoecepa</i> J2315                                   | 8.06 | 926 | TransportDB |
| Bacteria | <i>Burkholderia</i>    | <i>cepa</i> 383 (R18194)                                 | 8.68 | 930 | TransportDB |
| Bacteria | <i>Bacillus</i>        | <i>cereus</i> 03BB102                                    | 5.45 | 673 | TransportDB |
| Bacteria | <i>Bacillus</i>        | <i>cereus</i> AH187                                      | 5.60 | 696 | TransportDB |
| Bacteria | <i>Bacillus</i>        | <i>cereus</i> AH820                                      | 5.59 | 699 | TransportDB |
| Bacteria | <i>Bacillus</i>        | <i>cereus</i> ATCC10987                                  | 5.43 | 695 | TransportDB |

|          |                        |                                                               |      |      |             |
|----------|------------------------|---------------------------------------------------------------|------|------|-------------|
| Bacteria | <i>Bacillus</i>        | <i>cereus</i> ATCC14579                                       | 5.43 | 642  | TransportDB |
| Bacteria | <i>Bacillus</i>        | <i>cereus</i> B4264                                           | 5.42 | 652  | TransportDB |
| Bacteria | <i>Bacillus</i>        | <i>cereus</i> biovar anthracis str CI                         | 5.49 | 703  | TransportDB |
| Bacteria | <i>Bacillus</i>        | <i>cereus</i> E33L                                            | 5.84 | 729  | TransportDB |
| Bacteria | <i>Bacillus</i>        | <i>cereus</i> F83776                                          | 5.29 | 674  | TransportDB |
| Bacteria | <i>Bacillus</i>        | <i>cereus</i> FRI35                                           | 5.38 | 702  | TransportDB |
| Bacteria | <i>Bacillus</i>        | <i>cereus</i> G9842                                           | 5.74 | 672  | TransportDB |
| Bacteria | <i>Bacillus</i>        | <i>cereus</i> NC7401                                          | 5.55 | 693  | TransportDB |
| Bacteria | <i>Bacillus</i>        | <i>cereus</i> Q1                                              | 5.51 | 710  | TransportDB |
| Bacteria | <i>Brucella</i>        | <i>ceti</i> TE1075912                                         | 3.28 | 433  | TransportDB |
| Bacteria | <i>Brucella</i>        | <i>ceti</i> TE2875312                                         | 3.28 | 375  | TransportDB |
| Bacteria | <i>Baumannia</i>       | <i>cicadellinicola</i> str Hc<br><i>Homalodisca coagulata</i> | 0.69 | 49   | TransportDB |
| Bacteria | <i>Bartonella</i>      | <i>clarridgeiae</i> 73                                        | 1.52 | 136  | TransportDB |
| Bacteria | <i>Bacillus</i>        | <i>clausii</i> KSMK16                                         | 4.3  | 656  | TransportDB |
| Bacteria | <i>Bacillus</i>        | <i>coagulans</i> 26                                           | 3.07 | 350  | TransportDB |
| Bacteria | <i>Bacillus</i>        | <i>coagulans</i> 36D1                                         | 3.55 | 420  | TransportDB |
| Bacteria | <i>Borrelia</i>        | <i>crocidurae</i> str Achema                                  | 1.53 | 92   | TransportDB |
| Bacteria | <i>Bacillus</i>        | <i>cytotoxicus</i> NVH39198                                   | 4.09 | 486  | TransportDB |
| Bacteria | <i>Bifidobacterium</i> | <i>dentium</i> Bd1                                            | 2.64 | 347  | TransportDB |
| Bacteria | <i>Borrelia</i>        | <i>duttonii</i> Ly                                            | 1.57 | 93   | TransportDB |
| Bacteria | <i>Bdellovibrio</i>    | <i>exovor</i> JSS                                             | 2.66 | 203  | TransportDB |
| Bacteria | <i>Brachybacterium</i> | <i>faecium</i> DSM4810                                        | 3.61 | 464  | TransportDB |
| Bacteria | <i>Butyrivibrio</i>    | <i>fibrisolvens</i> 164                                       | 3.16 | 283  | TransportDB |
| Bacteria | <i>Bacteroides</i>     | <i>fragilis</i> 638R                                          | 5.37 | 298  | TransportDB |
| Bacteria | <i>Bacteroides</i>     | <i>fragilis</i> NCTC9343                                      | 5.24 | 290  | TransportDB |
| Bacteria | <i>Bacteroides</i>     | <i>fragilis</i> YCH46                                         | 5.31 | 297  | TransportDB |
| Bacteria | <i>Borrelia</i>        | <i>garinii</i> BgVir                                          | 0.99 | 95   | TransportDB |
| Bacteria | <i>Borrelia</i>        | <i>garinii</i> NMJW1                                          | 0.90 | 88   | TransportDB |
| Bacteria | <i>Borrelia</i>        | <i>garinii</i> PBi                                            | 0.99 | 95   | TransportDB |
| Bacteria | <i>Burkholderia</i>    | <i>gladioli</i> BSR3                                          | 9.05 | 896  | TransportDB |
| Bacteria | <i>Burkholderia</i>    | <i>glumae</i> BGR1                                            | 7.28 | 605  | TransportDB |
| Bacteria | <i>Bartonella</i>      | <i>grahamii</i> as4aup                                        | 2.37 | 187  | TransportDB |
| Bacteria | <i>Bacillus</i>        | <i>halodurans</i> C125                                        | 4.2  | 539  | TransportDB |
| Bacteria | <i>Bacteroides</i>     | <i>helcogenes</i> P36108                                      | 4.0  | 208  | TransportDB |
| Bacteria | <i>Bartonella</i>      | <i>henselae</i> str Houston1                                  | 1.93 | 155  | TransportDB |
| Bacteria | <i>Borrelia</i>        | <i>hermsii</i> DAH                                            | 0.92 | 85   | TransportDB |
| Bacteria | <i>Brachyspira</i>     | <i>hyodysenteriae</i> WA1                                     | 3.04 | 285  | TransportDB |
| Bacteria | <i>Beijerinckia</i>    | <i>indica</i> subsp <i>indica</i> ATCC9039                    | 4.42 | 369  | TransportDB |
| Bacteria | <i>Bacillus</i>        | <i>infantis</i> NRRLB14911                                    | 4.88 | 582  | TransportDB |
| Bacteria | <i>Brachyspira</i>     | <i>intermedia</i> PWSA                                        | 3.31 | 300  | TransportDB |
| Bacteria | <i>Bradyrhizobium</i>  | <i>japonicum</i> USDA110                                      | 9.11 | 1107 | TransportDB |
| Bacteria | <i>Bradyrhizobium</i>  | <i>japonicum</i> USDA6                                        | 9.21 | 1138 | TransportDB |
| Bacteria | <i>Bacillus</i>        | <i>licheniformis</i> 9945A                                    | 4.38 | 599  | TransportDB |
| Bacteria | <i>Bacillus</i>        | <i>licheniformis</i><br>DSM13ATCC14580                        | 4.22 | 567  | TransportDB |
| Bacteria | <i>Bifidobacterium</i> | <i>longum</i> DJO10A                                          | 2.39 | 276  | TransportDB |

|          |                        |                                                      |      |     |             |
|----------|------------------------|------------------------------------------------------|------|-----|-------------|
| Bacteria | <i>Bifidobacterium</i> | <i>longum</i> NCC2705                                | 2.26 | 253 | TransportDB |
| Bacteria | <i>Bifidobacterium</i> | <i>longum</i> subsp <i>infantis</i> 157F             | 2.41 | 273 | TransportDB |
| Bacteria | <i>Bifidobacterium</i> | <i>longum</i> subsp <i>infantis</i> ATCC15697JCM1222 | 2.83 | 351 | TransportDB |
| Bacteria | <i>Bifidobacterium</i> | <i>longum</i> subsp <i>longum</i> BBMN68             | 2.27 | 275 | TransportDB |
| Bacteria | <i>Bifidobacterium</i> | <i>longum</i> subsp <i>longum</i> F8                 | 2.38 | 233 | TransportDB |
| Bacteria | <i>Bifidobacterium</i> | <i>longum</i> subsp <i>longum</i> JCM1217            | 2.39 | 255 | TransportDB |
| Bacteria | <i>Bifidobacterium</i> | <i>longum</i> subsp <i>longum</i> JDM301             | 2.48 | 314 | TransportDB |
| Bacteria | <i>Bifidobacterium</i> | <i>longum</i> subsp <i>longum</i> KACC91563          | 2.4  | 272 | TransportDB |
| Bacteria | <i>Burkholderia</i>    | <i>mallei</i> ATCC23344                              | 5.84 | 558 | TransportDB |
| Bacteria | <i>Burkholderia</i>    | <i>mallei</i> NCTC10229                              | 5.74 | 597 | TransportDB |
| Bacteria | <i>Burkholderia</i>    | <i>mallei</i> NCTC10247                              | 5.85 | 577 | TransportDB |
| Bacteria | <i>Burkholderia</i>    | <i>mallei</i> SAVP1                                  | 5.23 | 541 | TransportDB |
| Bacteria | <i>Bacteriovorax</i>   | <i>marinus</i> SJ                                    | 3.44 | 213 | TransportDB |
| Bacteria | <i>Bacillus</i>        | <i>megaterium</i> DSM319                             | 5.1  | 667 | TransportDB |
| Bacteria | <i>Bacillus</i>        | <i>megaterium</i> QMB1551                            | 5.52 | 700 | TransportDB |
| Bacteria | <i>Bacillus</i>        | <i>megaterium</i> WSH002                             | 5.08 | 652 | TransportDB |
| Bacteria | <i>Brucella</i>        | <i>melitensis</i> ATCC23457                          | 3.31 | 425 | TransportDB |
| Bacteria | <i>Brucella</i>        | <i>melitensis</i> biovar <i>Abortus</i> 2308         | 3.28 | 417 | TransportDB |
| Bacteria | <i>Brucella</i>        | <i>melitensis</i> bv <i>ovis</i> ATCC25840           | 3.28 | 392 | TransportDB |
| Bacteria | <i>Brucella</i>        | <i>melitensis</i> bv <i>suis</i> 1330                | 3.31 | 431 | TransportDB |
| Bacteria | <i>Brucella</i>        | <i>melitensis</i> bv1str16M                          | 3.29 | 476 | TransportDB |
| Bacteria | <i>Brucella</i>        | <i>melitensis</i> M28                                | 3.31 | 479 | TransportDB |
| Bacteria | <i>Brucella</i>        | <i>melitensis</i> M590                               | 3.31 | 480 | TransportDB |
| Bacteria | <i>Brucella</i>        | <i>melitensis</i> NI                                 | 3.29 | 479 | TransportDB |
| Bacteria | <i>Brucella</i>        | <i>microti</i> CCM4915                               | 3.34 | 462 | TransportDB |
| Bacteria | <i>Burkholderia</i>    | <i>multivorans</i> ATCC17616                         | 7.01 | 810 | TransportDB |
| Bacteria | <i>Brachyspira</i>     | <i>murdochii</i> DSM12563                            | 3.24 | 291 | TransportDB |
| Bacteria | <i>Bradyrhizobium</i>  | <i>oligotrophicum</i> S58                            | 8.26 | 953 | TransportDB |
| Bacteria | <i>Brucella</i>        | <i>ovis</i> ATCC25840                                | 3.28 | 393 | TransportDB |
| Bacteria | <i>Bordetella</i>      | <i>parapertussis</i> 12822                           | 4.77 | 751 | TransportDB |
| Bacteria | <i>Bordetella</i>      | <i>parapertussis</i> Bpp5                            | 4.9  | 722 | TransportDB |
| Bacteria | <i>Bordetella</i>      | <i>pertussis</i> 18323                               | 4.04 | 501 | TransportDB |
| Bacteria | <i>Bordetella</i>      | <i>pertussis</i> CS                                  | 4.12 | 547 | TransportDB |
| Bacteria | <i>Bordetella</i>      | <i>pertussis</i> Tohamal                             | 4.09 | 539 | TransportDB |
| Bacteria | <i>Bordetella</i>      | <i>petrii</i> DSM12804                               | 5.29 | 772 | TransportDB |
| Bacteria | <i>Burkholderia</i>    | <i>phenoliruptrix</i> BR3459a                        | 7.65 | 873 | TransportDB |
| Bacteria | <i>Burkholderia</i>    | <i>phymatum</i> STM815                               | 8.68 | 938 | TransportDB |
| Bacteria | <i>Burkholderia</i>    | <i>phytofirmans</i> PsJN                             | 8.21 | 999 | TransportDB |
| Bacteria | <i>Brachyspira</i>     | <i>pilosicoli</i> 951000                             | 2.59 | 262 | TransportDB |
| Bacteria | <i>Brachyspira</i>     | <i>pilosicoli</i> B2904                              | 2.77 | 291 | TransportDB |
| Bacteria | <i>Brachyspira</i>     | <i>pilosicoli</i> P43678                             | 2.56 | 237 | TransportDB |
| Bacteria | <i>Brachyspira</i>     | <i>pilosicoli</i> WesB                               | 2.89 | 308 | TransportDB |
| Bacteria | <i>Brucella</i>        | <i>pinnipedialis</i> B294                            | 3.4  | 455 | TransportDB |

|          |                        |                                                         |      |      |             |
|----------|------------------------|---------------------------------------------------------|------|------|-------------|
| Bacteria | <i>Butyrivibrio</i>    | <i>proteoclasticus</i> B316                             | 4.4  | 357  | TransportDB |
| Bacteria | <i>Bacillus</i>        | <i>pseudofirmus</i> OF4                                 | 4.25 | 473  | TransportDB |
| Bacteria | <i>Burkholderia</i>    | <i>pseudomallei</i> 1026b                               | 7.23 | 700  | TransportDB |
| Bacteria | <i>Burkholderia</i>    | <i>pseudomallei</i> 1106a                               | 7.09 | 695  | TransportDB |
| Bacteria | <i>Burkholderia</i>    | <i>pseudomallei</i> 1710b                               | 7.31 | 690  | TransportDB |
| Bacteria | <i>Burkholderia</i>    | <i>pseudomallei</i> 668                                 | 7.04 | 702  | TransportDB |
| Bacteria | <i>Burkholderia</i>    | <i>pseudomallei</i> BPC006                              | 7.16 | 689  | TransportDB |
| Bacteria | <i>Burkholderia</i>    | <i>pseudomallei</i> K96243                              | 7.25 | 703  | TransportDB |
| Bacteria | <i>Bacillus</i>        | <i>pumilus</i> SAFR032                                  | 3.7  | 477  | TransportDB |
| Bacteria | <i>Bartonella</i>      | <i>quintana</i> RM11                                    | 1.59 | 148  | TransportDB |
| Bacteria | <i>Bartonella</i>      | <i>quintana</i> str Toulouse                            | 1.58 | 140  | TransportDB |
| Bacteria | <i>Borrelia</i>        | <i>recurrentis</i> A1                                   | 1.24 | 89   | TransportDB |
| Bacteria | <i>Burkholderia</i>    | <i>rhizoxinica</i> HKI454                               | 3.75 | 270  | TransportDB |
| Bacteria | <i>Bacteroides</i>     | <i>salanitronis</i> DSM18170                            | 4.31 | 194  | TransportDB |
| Bacteria | <i>Blastococcus</i>    | <i>saxobsidens</i> DD2                                  | 4.88 | 440  | TransportDB |
| Bacteria | <i>Bacillus</i>        | <i>selenitireducens</i> MLS10                           | 3.59 | 381  | TransportDB |
| Bacteria | <i>Bacillus</i>        | <i>s1NLA3E</i>                                          | 4.82 | 515  | TransportDB |
| Bacteria | <i>Burkholderia</i>    | <i>s383</i>                                             | 8.68 | 972  | TransportDB |
| Bacteria | <i>Blattabacterium</i> | <i>sblaberus giganteus</i>                              | 0.63 | 40   | TransportDB |
| Bacteria | <i>Blattabacterium</i> | <i>sBlatta orientalis</i> str Tarazona                  | 0.64 | 38   | TransportDB |
| Bacteria | <i>Blattabacterium</i> | <i>sBlattella germanica</i> str Bge                     | 0.64 | 40   | TransportDB |
| Bacteria | <i>Bradyrhizobium</i>  | <i>sBTAi1</i>                                           | 8.49 | 1039 | TransportDB |
| Bacteria | <i>Burkholderia</i>    | <i>sCCGE1001</i>                                        | 6.83 | 791  | TransportDB |
| Bacteria | <i>Burkholderia</i>    | <i>sCCGE1002</i>                                        | 7.88 | 899  | TransportDB |
| Bacteria | <i>Burkholderia</i>    | <i>sCCGE1003</i>                                        | 7.04 | 811  | TransportDB |
| Bacteria | <i>Bacteroides</i>     | <i>sCF</i>                                              | 2.66 | 165  | TransportDB |
| Bacteria | <i>Blattabacterium</i> | <i>scryptocercus punctulatus</i> str Cpu                | 0.61 | 36   | TransportDB |
| Bacteria | <i>Bacillus</i>        | <i>sJS</i>                                              | 4.12 | 543  | TransportDB |
| Bacteria | <i>Burkholderia</i>    | <i>sKJ006</i>                                           | 6.63 | 707  | TransportDB |
| Bacteria | <i>Blattabacterium</i> | <i>smastotermesdarwiniensis</i> str MADAR               | 0.59 | 37   | TransportDB |
| Bacteria | <i>Blattabacterium</i> | <i>snauphoetacinerea</i>                                | 0.63 | 41   | TransportDB |
| Bacteria | <i>Bradyrhizobium</i>  | <i>sORS278</i>                                          | 7.46 | 857  | TransportDB |
| Bacteria | <i>Blattabacterium</i> | <i>spanesthia angustipennis</i> <i>spadica</i> str BPAA | 0.63 | 39   | TransportDB |
| Bacteria | <i>Blattabacterium</i> | <i>speriplaneta americana</i> str BPLAN                 | 0.64 | 38   | TransportDB |
| Bacteria | <i>Burkholderia</i>    | <i>sRPE64</i>                                           | 6.96 | 852  | TransportDB |
| Bacteria | <i>Bradyrhizobium</i>  | <i>sS23321</i>                                          | 7.23 | 957  | TransportDB |
| Bacteria | <i>Burkholderia</i>    | <i>sYI23</i>                                            | 8.9  | 1083 | TransportDB |
| Bacteria | <i>Bacillus</i>        | <i>subtilis</i> BSn5                                    | 4.09 | 553  | TransportDB |
| Bacteria | <i>Bacillus</i>        | <i>subtilis</i> PY79                                    | 4.03 | 549  | TransportDB |
| Bacteria | <i>Bacillus</i>        | <i>subtilis</i> QB928                                   | 4.15 | 549  | TransportDB |
| Bacteria | <i>Bacillus</i>        | <i>subtilis</i> subsp natto BEST195                     | 4.1  | 550  | TransportDB |
| Bacteria | <i>Bacillus</i>        | <i>subtilis</i> subsp spizizenii str W23                | 4.03 | 527  | TransportDB |

|          |                        |                                                                 |      |      |             |
|----------|------------------------|-----------------------------------------------------------------|------|------|-------------|
| Bacteria | <i>Bacillus</i>        | <i>subtilis</i> subsp <i>spizizenii</i><br>TUB10                | 4.21 | 544  | TransportDB |
| Bacteria | <i>Bacillus</i>        | <i>subtilis</i> subsp <i>subtilis</i><br>6051HGW                | 4.22 | 556  | TransportDB |
| Bacteria | <i>Bacillus</i>        | <i>subtilis</i> subsp <i>subtilis</i> str 168                   | 4.22 | 559  | TransportDB |
| Bacteria | <i>Bacillus</i>        | <i>subtilis</i> subsp <i>subtilis</i> str BAB1                  | 4.02 | 544  | TransportDB |
| Bacteria | <i>Bacillus</i>        | <i>subtilis</i> subsp <i>subtilis</i> str BSP1                  | 4.04 | 546  | TransportDB |
| Bacteria | <i>Bacillus</i>        | <i>subtilis</i> subsp <i>subtilis</i> str<br>RONN1              | 4.01 | 529  | TransportDB |
| Bacteria | <i>Bacillus</i>        | <i>subtilis</i> XF1                                             | 4.06 | 525  | TransportDB |
| Bacteria | <i>Brevundimonas</i>   | <i>subvibrioides</i> ATCC15264                                  | 3.45 | 222  | TransportDB |
| Bacteria | <i>Brucella</i>        | <i>suis</i> 1330                                                | 3.32 | 438  | TransportDB |
| Bacteria | <i>Brucella</i>        | <i>suis</i> ATCC23445                                           | 3.32 | 434  | TransportDB |
| Bacteria | <i>Brucella</i>        | <i>suis</i> VBI22                                               | 3.32 | 438  | TransportDB |
| Bacteria | <i>Burkholderia</i>    | <i>thailandensis</i> E264                                       | 6.72 | 669  | TransportDB |
| Bacteria | <i>Burkholderia</i>    | <i>thailandensis</i> MSMB121                                    | 6.73 | 768  | TransportDB |
| Bacteria | <i>Bifidobacterium</i> | <i>thermophilum</i> RBL67                                       | 2.29 | 230  | TransportDB |
| Bacteria | <i>Bacteroides</i>     | <i>thetaitotaomicron</i> VPI5482                                | 6.29 | 306  | TransportDB |
| Bacteria | <i>Bacillus</i>        | <i>thuringiensis</i> BMB171                                     | 5.64 | 660  | TransportDB |
| Bacteria | <i>Bacillus</i>        | <i>thuringiensis</i> Bt407                                      | 6.13 | 684  | TransportDB |
| Bacteria | <i>Bacillus</i>        | <i>thuringiensis</i> HD771                                      | 6.44 | 681  | TransportDB |
| Bacteria | <i>Bacillus</i>        | <i>thuringiensis</i> HD789                                      | 6.33 | 667  | TransportDB |
| Bacteria | <i>Bacillus</i>        | <i>thuringiensis</i> MC28                                       | 6.69 | 725  | TransportDB |
| Bacteria | <i>Bacillus</i>        | <i>thuringiensis</i> serovar <i>chinensis</i><br>CT43           | 6.15 | 687  | TransportDB |
| Bacteria | <i>Bacillus</i>        | <i>thuringiensis</i> serovar <i>finitimus</i><br>YBT020         | 5.68 | 702  | TransportDB |
| Bacteria | <i>Bacillus</i>        | <i>thuringiensis</i> serovar<br><i>konkukian</i> str 9727       | 5.31 | 693  | TransportDB |
| Bacteria | <i>Bacillus</i>        | <i>thuringiensis</i> serovar <i>kurstaki</i><br>str HD73        | 5.91 | 673  | TransportDB |
| Bacteria | <i>Bacillus</i>        | <i>thuringiensis</i> serovar<br><i>thuringiensis</i> str IS5056 | 6.77 | 738  | TransportDB |
| Bacteria | <i>Bacillus</i>        | <i>thuringiensis</i> str AIHakam                                | 5.31 | 667  | TransportDB |
| Bacteria | <i>Bacillus</i>        | <i>thuringiensis</i> YBT1518                                    | 6.67 | 707  | TransportDB |
| Bacteria | <i>Bacillus</i>        | <i>toyonensis</i> BCT7112                                       | 5.03 | 642  | TransportDB |
| Bacteria | <i>Bibersteinia</i>    | <i>trehalosi</i><br>USDAARSUSMARC192                            | 2.41 | 289  | TransportDB |
| Bacteria | <i>Bartonella</i>      | <i>tribocorum</i> CIP105476                                     | 2.64 | 189  | TransportDB |
| Bacteria | <i>Borrelia</i>        | <i>turicatae</i> 91E135                                         | 0.92 | 87   | TransportDB |
| Bacteria | <i>Burkholderia</i>    | <i>vietnamiensis</i> G4                                         | 8.39 | 809  | TransportDB |
| Bacteria | <i>Bartonella</i>      | <i>vinsonii</i> subsp <i>berkhoffi</i> str<br>Winnie            | 1.80 | 155  | TransportDB |
| Bacteria | <i>Bacteroides</i>     | <i>vulgatus</i> ATCC8482                                        | 5.16 | 268  | TransportDB |
| Bacteria | <i>Bacillus</i>        | <i>weihenstephanensis</i> KBAB4                                 | 5.87 | 678  | TransportDB |
| Bacteria | <i>Burkholderia</i>    | <i>xenovorans</i> LB400                                         | 9.73 | 1157 | TransportDB |
| Bacteria | <i>Bacteroides</i>     | <i>xylanisolvens</i> XB1A                                       | 5.98 | 261  | TransportDB |

|          |                             |                                                                        |       |     |             |
|----------|-----------------------------|------------------------------------------------------------------------|-------|-----|-------------|
| Bacteria | <i>Chlamydomphila</i>       | <i>abortus</i> S263                                                    | 1.14  | 96  | TransportDB |
| Bacteria | <i>Candidatus</i>           | <i>accumulibacter</i><br>phosphatisclade IIA str UW1                   | 5.31  | 438 | TransportDB |
| Bacteria | <i>Clostridium</i>          | <i>acetobutylicum</i> ATCC824                                          | 4.13  | 424 | TransportDB |
| Bacteria | <i>Clostridium</i>          | <i>acetobutylicum</i> DSM1731                                          | 4.15  | 426 | TransportDB |
| Bacteria | <i>Clostridium</i>          | <i>acetobutylicum</i> EA2018                                           | 4.13  | 428 | TransportDB |
| Bacteria | <i>Catenulispora</i>        | <i>acidiphila</i> DSM44928                                             | 10.47 | 894 | TransportDB |
| Bacteria | <i>Clostridium</i>          | <i>acidurici</i> 9a                                                    | 3.11  | 380 | TransportDB |
| Bacteria | <i>Caldilinea</i>           | <i>aerophila</i><br>DSM14535NBRC104270                                 | 5.14  | 588 | TransportDB |
| Bacteria | <i>Chloroflexus</i>         | <i>aggregans</i> DSM9485                                               | 4.68  | 359 | TransportDB |
| Bacteria | <i>Coraliomargarita</i>     | <i>akajimensis</i> DSM45221                                            | 3.75  | 199 | TransportDB |
| Bacteria | <i>Cellulophaga</i>         | <i>algicola</i> DSM14237                                               | 4.89  | 253 | TransportDB |
| Bacteria | <i>Candidatus</i>           | <i>amoebophilus asiaticus</i> 5a2                                      | 1.88  | 100 | TransportDB |
| Bacteria | <i>Cyanobacterium</i>       | <i>aponinum</i> PCC10605                                               | 4.18  | 279 | TransportDB |
| Bacteria | <i>Corynebacterium</i>      | <i>argentoratense</i> DSM44202                                         | 2.03  | 212 | TransportDB |
| Bacteria | <i>Candidatus</i>           | <i>Arthromitus</i> sp SFBmouse<br>Japan                                | 1.62  | 151 | TransportDB |
| Bacteria | <i>Candidatus</i>           | <i>arthromitus</i> sp SFB mouse Yit                                    | 1.59  | 155 | TransportDB |
| Bacteria | <i>Candidatus</i>           | <i>arthromitus</i> sp SFB rat Yit                                      | 1.52  | 156 | TransportDB |
| Bacteria | <i>Croceibacter</i>         | <i>atlanticus</i> HTCC2559                                             | 2.95  | 176 | TransportDB |
| Bacteria | <i>Chloroflexus</i>         | <i>aurantiacus</i> J10fl                                               | 5.26  | 398 | TransportDB |
| Bacteria | <i>Corynebacterium</i>      | <i>aurimucosum</i> ATCC700975                                          | 2.82  | 302 | TransportDB |
| Bacteria | <i>Clostridium</i>          | <i>autoethanogenum</i> DSM10061                                        | 4.35  | 468 | TransportDB |
| Bacteria | <i>Candidatus</i>           | <i>azobacteroides pseudo</i><br><i>trichonymphae genomovar</i><br>CFP2 | 1.22  | 50  | TransportDB |
| Bacteria | <i>Clostridium</i>          | <i>beijeinckii</i> NCIMB8052                                           | 6.0   | 680 | TransportDB |
| Bacteria | <i>Caldicellulosiruptor</i> | <i>bescii</i> DSM6725                                                  | 2.93  | 254 | TransportDB |
| Bacteria | <i>Candidatus</i>           | <i>blochmannia chromaiodes</i> str<br>640                              | 0.79  | 47  | TransportDB |
| Bacteria | <i>Candidatus</i>           | <i>blochmannia floridanus</i>                                          | 0.71  | 46  | TransportDB |
| Bacteria | <i>Candidatus</i>           | <i>blochmannia pennsylvanicus</i><br>str BPEN                          | 0.79  | 47  | TransportDB |
| Bacteria | <i>Candidatus</i>           | <i>blochmannia vafer</i> str BVAF                                      | 0.72  | 47  | TransportDB |
| Bacteria | <i>Clostridium</i>          | <i>botulinum</i> A2 str Kyoto                                          | 4.16  | 464 | TransportDB |
| Bacteria | <i>Clostridium</i>          | <i>botulinum</i> A3 str Loch Maree                                     | 4.26  | 485 | TransportDB |
| Bacteria | <i>Clostridium</i>          | <i>botulinum</i> A str ATCC19397                                       | 3.86  | 450 | TransportDB |
| Bacteria | <i>Clostridium</i>          | <i>botulinum</i> A str ATCC3502                                        | 3.9   | 459 | TransportDB |
| Bacteria | <i>Clostridium</i>          | <i>botulinum</i> A str Hall                                            | 3.76  | 446 | TransportDB |
| Bacteria | <i>Clostridium</i>          | <i>botulinum</i> B1 str Okra                                           | 4.11  | 464 | TransportDB |
| Bacteria | <i>Clostridium</i>          | <i>botulinum</i> Ba4 str 657                                           | 4.26  | 455 | TransportDB |
| Bacteria | <i>Coxiella</i>             | <i>burnetii</i> CbuG_Q212                                              | 2.01  | 152 | TransportDB |
| Bacteria | <i>Coxiella</i>             | <i>burnetii</i> CbuK_Q154                                              | 2.1   | 149 | TransportDB |
| Bacteria | <i>Coxiella</i>             | <i>burnetii</i> Dugway 5J108111                                        | 2.21  | 167 | TransportDB |
| Bacteria | <i>Coxiella</i>             | <i>burnetii</i> RSA331                                                 | 2.05  | 145 | TransportDB |
| Bacteria | <i>Coxiella</i>             | <i>burnetii</i> RSA493                                                 | 2.03  | 154 | TransportDB |
| Bacteria | <i>Chthonomonas</i>         | <i>calidirosea</i> T49                                                 | 3.44  | 194 | TransportDB |

|          |                        |                                                     |       |     |             |
|----------|------------------------|-----------------------------------------------------|-------|-----|-------------|
| Bacteria | <i>Corynebacterium</i> | <i>callunae</i> DSM20147                            | 2.93  | 325 | TransportDB |
| Bacteria | <i>Capnocytophaga</i>  | <i>canimorsus</i> Cc5                               | 2.57  | 139 | TransportDB |
| Bacteria | <i>Coprococcus</i>     | <i>catus</i> GD7                                    | 3.52  | 350 | TransportDB |
| Bacteria | <i>Chlamydomphila</i>  | <i>caviae</i> GPIC                                  | 1.18  | 91  | TransportDB |
| Bacteria | <i>Clostridium</i>     | <i>cellulolyticum</i> H10                           | 4.07  | 307 | TransportDB |
| Bacteria | <i>Clostridium</i>     | <i>cellulovorans</i> 743B                           | 5.26  | 433 | TransportDB |
| Bacteria | <i>Clostridium</i>     | <i>csaccharolyticum</i> K10                         | 3.77  | 344 | TransportDB |
| Bacteria | <i>Candidatus</i>      | <i>chloracidobacterium</i><br><i>thermophilum</i> B | 3.7   | 187 | TransportDB |
| Bacteria | <i>Chlorobium</i>      | <i>chlorochromatii</i> CaD3                         | 2.57  | 133 | TransportDB |
| Bacteria | <i>Clostridium</i>     | <i>clariflavum</i> DSM19732                         | 4.9   | 300 | TransportDB |
| Bacteria | <i>Candidatus</i>      | <i>cloacamonas</i><br><i>acidaminovorans</i>        | 2.25  | 122 | TransportDB |
| Bacteria | <i>Campylobacter</i>   | <i>coli</i> 15537360                                | 1.69  | 206 | TransportDB |
| Bacteria | <i>Campylobacter</i>   | <i>coli</i> 76339                                   | 1.58  | 195 | TransportDB |
| Bacteria | <i>Campylobacter</i>   | <i>coli</i> CVMN29710                               | 1.73  | 200 | TransportDB |
| Bacteria | <i>Campylobacter</i>   | <i>concisus</i> 13826                               | 2.1   | 176 | TransportDB |
| Bacteria | <i>Coralloccoccus</i>  | <i>coralloides</i> DSM2259                          | 10.08 | 439 | TransportDB |
| Bacteria | <i>Caulobacter</i>     | <i>crensentus</i> CB15                              | 4.02  | 262 | TransportDB |
| Bacteria | <i>Caulobacter</i>     | <i>crensentus</i> NA1000                            | 4.04  | 264 | TransportDB |
| Bacteria | <i>Cryptobacterium</i> | <i>curtum</i> DSM15641                              | 1.62  | 144 | TransportDB |
| Bacteria | <i>Campylobacter</i>   | <i>curvus</i> 52592                                 | 1.97  | 207 | TransportDB |
| Bacteria | <i>Candidatus</i>      | <i>desulfurudis</i> <i>audaxviator</i><br>MP104C    | 2.35  | 176 | TransportDB |
| Bacteria | <i>Clostridium</i>     | <i>difficile</i> 630                                | 4.3   | 517 | TransportDB |
| Bacteria | <i>Clostridium</i>     | <i>difficile</i> B1                                 | 4.46  | 532 | TransportDB |
| Bacteria | <i>Clostridium</i>     | <i>difficile</i> CD196                              | 4.11  | 518 | TransportDB |
| Bacteria | <i>Clostridium</i>     | <i>difficile</i> R20291                             | 4.19  | 526 | TransportDB |
| Bacteria | <i>Corynebacterium</i> | <i>diphtheriae</i> 241                              | 2.43  | 272 | TransportDB |
| Bacteria | <i>Corynebacterium</i> | <i>diphtheriae</i> 31A                              | 2.54  | 282 | TransportDB |
| Bacteria | <i>Corynebacterium</i> | <i>diphtheriae</i> BH8                              | 2.49  | 279 | TransportDB |
| Bacteria | <i>Corynebacterium</i> | <i>diphtheriae</i> C7beta                           | 2.5   | 286 | TransportDB |
| Bacteria | <i>Corynebacterium</i> | <i>diphtheriae</i> CDCE8392                         | 2.43  | 278 | TransportDB |
| Bacteria | <i>Corynebacterium</i> | <i>diphtheriae</i> HC01                             | 2.43  | 270 | TransportDB |
| Bacteria | <i>Corynebacterium</i> | <i>diphtheriae</i> HC02                             | 2.47  | 268 | TransportDB |
| Bacteria | <i>Corynebacterium</i> | <i>diphtheriae</i> HC03                             | 2.48  | 267 | TransportDB |
| Bacteria | <i>Corynebacterium</i> | <i>diphtheriae</i> HC04                             | 2.48  | 264 | TransportDB |
| Bacteria | <i>Corynebacterium</i> | <i>diphtheriae</i> INCA402                          | 2.45  | 281 | TransportDB |
| Bacteria | <i>Corynebacterium</i> | <i>diphtheriae</i> NCTC13129                        | 2.49  | 263 | TransportDB |
| Bacteria | <i>Corynebacterium</i> | <i>diphtheriae</i> PW8                              | 2.53  | 272 | TransportDB |
| Bacteria | <i>Corynebacterium</i> | <i>diphtheriae</i> VA01                             | 2.4   | 267 | TransportDB |
| Bacteria | <i>Candidate</i>       | <i>division</i> SR1bacterium<br>RAAC1_SR1_1         | 1.18  | 62  | TransportDB |
| Bacteria | <i>Candidate</i>       | <i>division</i> WWE3 bacterium<br>RAAC2_WWE3_1      | 0.88  | 49  | TransportDB |
| Bacteria | <i>Corynebacterium</i> | <i>efficiens</i> YS314                              | 3.22  | 344 | TransportDB |
| Bacteria | <i>Candidatus</i>      | <i>endolissoclinum</i> <i>patella</i> L2            | 1.48  | 72  | TransportDB |
| Bacteria | <i>Cardinium</i>       | <i>endosymbiont</i> cEper1 of                       | 0.94  | 71  | TransportDB |

|          |                             |                                                                            |      |     |             |
|----------|-----------------------------|----------------------------------------------------------------------------|------|-----|-------------|
|          |                             | <i>Encarsia pergandiella</i>                                               |      |     |             |
| Bacteria | <i>Crinalium</i>            | <i>epipsammum</i> PCC9333                                                  | 5.62 | 280 | TransportDB |
| Bacteria | <i>Caldisericum</i>         | <i>exile</i> AZM16c01                                                      | 1.56 | 192 | TransportDB |
| Bacteria | <i>Chlamydomphila</i>       | <i>felis</i> FeC56                                                         | 1.17 | 94  | TransportDB |
| Bacteria | <i>Campylobacter</i>        | <i>fetus</i> subsp <i>fetus</i> 8240                                       | 1.77 | 203 | TransportDB |
| Bacteria | <i>Campylobacter</i>        | <i>fetus</i> subsp <i>testudinum</i> 03427                                 | 1.78 | 210 | TransportDB |
| Bacteria | <i>Cellulomonas</i>         | <i>fimi</i> ATCC484                                                        | 4.27 | 452 | TransportDB |
| Bacteria | <i>Cellulomonas</i>         | <i>flavigena</i> DSM20109                                                  | 4.12 | 351 | TransportDB |
| Bacteria | <i>Collimonas</i>           | <i>fungivorans</i> Ter331                                                  | 5.19 | 561 | TransportDB |
| Bacteria | <i>Clostridiales</i>        | <i>genomo</i> sBVAB3 str UPII95                                            | 1.81 | 239 | TransportDB |
| Bacteria | <i>Coriobacterium</i>       | <i>glomerans</i> PW2                                                       | 2.12 | 317 | TransportDB |
| Bacteria | <i>Corynebacterium</i>      | <i>glutamicum</i> ATCC13032                                                | 3.28 | 388 | TransportDB |
| Bacteria | <i>Corynebacterium</i>      | <i>glutamicum</i> K051                                                     | 3.31 | 386 | TransportDB |
| Bacteria | <i>Corynebacterium</i>      | <i>glutamicum</i> MB001                                                    | 3.08 | 380 | TransportDB |
| Bacteria | <i>Corynebacterium</i>      | <i>glutamicum</i> R                                                        | 3.36 | 430 | TransportDB |
| Bacteria | <i>Corynebacterium</i>      | <i>glutamicum</i> SCgG1                                                    | 3.35 | 432 | TransportDB |
| Bacteria | <i>Corynebacterium</i>      | <i>glutamicum</i> SCgG2                                                    | 3.35 | 431 | TransportDB |
| Bacteria | <i>Cyanobium</i>            | <i>gracile</i> PCC6307                                                     | 3.34 | 260 | TransportDB |
| Bacteria | <i>Corynebacterium</i>      | <i>halotolerans</i><br>YIM70093DSM44683                                    | 3.22 | 343 | TransportDB |
| Bacteria | <i>Candidatus</i>           | <i>hamiltonella</i> <i>defensa</i> 5AT<br><i>Acyrtosiphon</i> <i>pisum</i> | 2.17 | 153 | TransportDB |
| Bacteria | <i>Campylobacter</i>        | <i>hominis</i> ATCCBAA381                                                  | 1.71 | 150 | TransportDB |
| Bacteria | <i>Cytophaga</i>            | <i>hutchinsonii</i> ATCC33406                                              | 4.43 | 219 | TransportDB |
| Bacteria | <i>Carboxydotherrmus</i>    | <i>hydrogenoformans</i> Z2901                                              | 2.4  | 201 | TransportDB |
| Bacteria | <i>Caldicellulosiruptor</i> | <i>hydrothermalis</i> 108                                                  | 2.77 | 312 | TransportDB |
| Bacteria | <i>Cellvibrio</i>           | <i>japonicus</i> Ueda107                                                   | 4.58 | 310 | TransportDB |
| Bacteria | <i>Corynebacterium</i>      | <i>jeikeium</i> K411                                                       | 2.48 | 239 | TransportDB |
| Bacteria | <i>Campylobacter</i>        | <i>jejuni</i> 4031                                                         | 1.67 | 208 | TransportDB |
| Bacteria | <i>Campylobacter</i>        | <i>jejuni</i> RM1221                                                       | 1.78 | 190 | TransportDB |
| Bacteria | <i>Campylobacter</i>        | <i>jejuni</i> subsp <i>doylei</i> 26997                                    | 1.85 | 180 | TransportDB |
| Bacteria | <i>Campylobacter</i>        | <i>jejuni</i> subsp <i>jejuni</i> 002425                                   | 1.72 | 197 | TransportDB |
| Bacteria | <i>Campylobacter</i>        | <i>jejuni</i> subsp <i>jejuni</i> 002426                                   | 1.62 | 213 | TransportDB |
| Bacteria | <i>Campylobacter</i>        | <i>jejuni</i> subsp <i>jejuni</i> 002538                                   | 1.66 | 211 | TransportDB |
| Bacteria | <i>Campylobacter</i>        | <i>jejuni</i> subsp <i>jejuni</i> 002544                                   | 1.71 | 218 | TransportDB |
| Bacteria | <i>Campylobacter</i>        | <i>jejuni</i> subsp <i>jejuni</i> 81116                                    | 1.63 | 204 | TransportDB |
| Bacteria | <i>Campylobacter</i>        | <i>jejuni</i> subsp <i>jejuni</i> 81176                                    | 1.7  | 215 | TransportDB |
| Bacteria | <i>Campylobacter</i>        | <i>jejuni</i> subsp <i>jejuni</i> I A3902                                  | 1.67 | 196 | TransportDB |
| Bacteria | <i>Campylobacter</i>        | <i>jejuni</i> subsp <i>jejuni</i><br>ICDCCJ07001                           | 1.71 | 195 | TransportDB |
| Bacteria | <i>Campylobacter</i>        | <i>jejuni</i> subsp <i>jejuni</i> M1                                       | 1.62 | 213 | TransportDB |
| Bacteria | <i>Campylobacter</i>        | <i>jejuni</i> subsp <i>jejuni</i><br>NCTC11168ATCC700819                   | 1.64 | 190 | TransportDB |
| Bacteria | <i>Campylobacter</i>        | <i>jejuni</i> subsp <i>jejuni</i><br>NCTC11168BN148                        | 1.64 | 190 | TransportDB |
| Bacteria | <i>Campylobacter</i>        | <i>jejuni</i> subsp <i>jejuni</i> PT14                                     | 1.64 | 194 | TransportDB |

|          |                             |                                                                   |      |     |             |
|----------|-----------------------------|-------------------------------------------------------------------|------|-----|-------------|
| Bacteria | <i>Campylobacter</i>        | <i>jejuni</i> subsp <i>jejuni</i> S3                              | 1.72 | 210 | TransportDB |
| Bacteria | <i>Candidatus</i>           | <i>kinetoplastibacterium blastocrithidiex strigomonasculicis</i>  | 0.82 | 49  | TransportDB |
| Bacteria | <i>Candidatus</i>           | <i>kinetoplastibacterium blastocrithidii</i> TCC012E              | 0.82 | 48  | TransportDB |
| Bacteria | <i>Candidatus</i>           | <i>kinetoplastibacterium crithidiex angomonasdeanei</i> ATCC30255 | 0.82 | 49  | TransportDB |
| Bacteria | <i>Candidatus</i>           | <i>kinetoplastibacterium crithidii</i> TCC036E                    | 0.82 | 49  | TransportDB |
| Bacteria | <i>Candidatus</i>           | <i>kinetoplastibacterium desouzaii</i> TCC079E                    | 0.83 | 48  | TransportDB |
| Bacteria | <i>Candidatus</i>           | <i>kinetoplastibacterium galatii</i> TCC219                       | 0.82 | 51  | TransportDB |
| Bacteria | <i>Candidatus</i>           | <i>kinetoplastibacterium oncopeltii</i> TCC290E                   | 0.81 | 47  | TransportDB |
| Bacteria | <i>Clostridium</i>          | <i>kluuyveri</i> DSM555                                           | 4.02 | 395 | TransportDB |
| Bacteria | <i>Clostridium</i>          | <i>kluuyveri</i> NBRC12016                                        | 3.96 | 383 | TransportDB |
| Bacteria | <i>Candidatus</i>           | <i>koribacter versatilis</i> Ellin345                             | 5.65 | 347 | TransportDB |
| Bacteria | <i>Citrobacter</i>          | <i>koseri</i> ATCCBAA895                                          | 4.74 | 725 | TransportDB |
| Bacteria | <i>Caldicellulosiruptor</i> | <i>kristjanssonii</i> 177R1B                                      | 2.8  | 224 | TransportDB |
| Bacteria | <i>Caldicellulosiruptor</i> | <i>kronotskyensis</i> 2002                                        | 2.84 | 276 | TransportDB |
| Bacteria | <i>Corynebacterium</i>      | <i>kroppenstedtii</i> DSM44385                                    | 2.45 | 259 | TransportDB |
| Bacteria | <i>Caldicellulosiruptor</i> | <i>lactoaceticus</i> 6A                                           | 2.67 | 208 | TransportDB |
| Bacteria | <i>Campylobacter</i>        | <i>lari</i> RM2100                                                | 1.57 | 165 | TransportDB |
| Bacteria | <i>Clostridium</i>          | <i>lentocellum</i> DSM5427                                        | 4.71 | 499 | TransportDB |
| Bacteria | <i>Candidatus</i>           | <i>liberibacter americanus</i> str SaoPaulo                       | 1.2  | 83  | TransportDB |
| Bacteria | <i>Candidatus</i>           | <i>liberibacter asiaticus</i> str gxpsy                           | 1.27 | 84  | TransportDB |
| Bacteria | <i>Candidatus</i>           | <i>liberibacter asiaticus</i> str psy62                           | 1.23 | 82  | TransportDB |
| Bacteria | <i>Candidatus</i>           | <i>liberibacter solanacearum</i> CLsoZC1                          | 1.26 | 90  | TransportDB |
| Bacteria | <i>Chlorobium</i>           | <i>limicola</i> DSM245                                            | 2.76 | 181 | TransportDB |
| Bacteria | <i>Clostridium</i>          | <i>ljungdahlii</i> DSM13528                                       | 4.63 | 519 | TransportDB |
| Bacteria | <i>Chlorobium</i>           | <i>luteolum</i> DSM273                                            | 2.36 | 183 | TransportDB |
| Bacteria | <i>Cellulophaga</i>         | <i>lytica</i> DSM7489                                             | 3.77 | 207 | TransportDB |
| Bacteria | <i>Carnobacterium</i>       | <i>maltaromaticum</i> LMA28                                       | 3.65 | 484 | TransportDB |
| Bacteria | <i>Cyclobacterium</i>       | <i>marinum</i> DSM745                                             | 6.22 | 312 | TransportDB |
| Bacteria | <i>Corynebacterium</i>      | <i>maris</i> DSM45190                                             | 2.83 | 307 | TransportDB |
| Bacteria | <i>Cupriavidus</i>          | <i>metallidurans</i> CH34                                         | 6.91 | 728 | TransportDB |
| Bacteria | <i>Candidatus</i>           | <i>Methylomirabilis oxyfera</i>                                   | 2.75 | 193 | TransportDB |
| Bacteria | <i>Clavibacter</i>          | <i>michiganensis</i> subsp <i>michiganensis</i> NCPPB382          | 3.4  | 395 | TransportDB |
| Bacteria | <i>Clavibacter</i>          | <i>michiganensis</i> subsp <i>nebraskensis</i> NCPPB2581          | 3.06 | 340 | TransportDB |
| Bacteria | <i>Clavibacter</i>          | <i>michiganensis</i> subsp <i>sepedonicus</i>                     | 3.4  | 356 | TransportDB |

|          |                             |                                                       |      |     |             |
|----------|-----------------------------|-------------------------------------------------------|------|-----|-------------|
| Bacteria | <i>Clavibacter</i>          | <i>midichloria mitochondrii</i> IricVA                | 1.18 | 85  | TransportDB |
| Bacteria | <i>Chamaesiphon</i>         | <i>minutus</i> PCC6605                                | 6.76 | 372 | TransportDB |
| Bacteria | <i>Candidatus</i>           | <i>moranella endobia</i> PCIT                         | 0.54 | 22  | TransportDB |
| Bacteria | <i>Candidatus</i>           | <i>moranella endobia</i> PCVAL                        | 0.54 | 22  | TransportDB |
| Bacteria | <i>Chlamydia</i>            | <i>muridarum</i> Nigg                                 | 1.08 | 88  | TransportDB |
| Bacteria | <i>Candidatus</i>           | <i>mycoplasma haemolamae</i> str Purdue               | 0.76 | 37  | TransportDB |
| Bacteria | <i>Candidatus</i>           | <i>mycoplasma haemominutum</i> Birmingham1            | 0.51 | 31  | TransportDB |
| Bacteria | <i>Cupriavidus</i>          | <i>necator</i> N1                                     | 8.48 | 944 | TransportDB |
| Bacteria | <i>Calditerrivibrio</i>     | <i>nitroreducens</i> DSM19672                         | 2.22 | 233 | TransportDB |
| Bacteria | <i>Candidatus</i>           | <i>nitrospira defluvii</i>                            | 4.32 | 259 | TransportDB |
| Bacteria | <i>Clostridium</i>          | <i>novyi</i> NT                                       | 2.55 | 274 | TransportDB |
| Bacteria | <i>Caldicellulosiruptor</i> | <i>obsidiansis</i> OB47                               | 2.53 | 230 | TransportDB |
| Bacteria | <i>Capnocytophaga</i>       | <i>ochracea</i> DSM7271                               | 2.61 | 140 | TransportDB |
| Bacteria | <i>Caldicellulosiruptor</i> | <i>owensensis</i> OL                                  | 2.43 | 219 | TransportDB |
| Bacteria | <i>Chlorobaculum</i>        | <i>parvum</i> NCIB8327                                | 2.29 | 192 | TransportDB |
| Bacteria | <i>Clostridium</i>          | <i>pasteurianum</i> BC1                               | 4.99 | 534 | TransportDB |
| Bacteria | <i>Chlamydomphila</i>       | <i>pecorum</i> E58                                    | 1.11 | 88  | TransportDB |
| Bacteria | <i>Chlamydia</i>            | <i>pecorum</i> P787                                   | 1.11 | 94  | TransportDB |
| Bacteria | <i>Chlamydia</i>            | <i>pecorum</i> PV30563                                | 1.1  | 93  | TransportDB |
| Bacteria | <i>Chlamydia</i>            | <i>pecorum</i> W73                                    | 1.11 | 93  | TransportDB |
| Bacteria | <i>Candidatus</i>           | <i>pelagibacter</i> sp IMCC9063                       | 1.28 | 142 | TransportDB |
| Bacteria | <i>Candidatus</i>           | <i>pelagibacter ubique</i> HTCC1062                   | 1.31 | 154 | TransportDB |
| Bacteria | <i>Clostridium</i>          | <i>perfringens</i> ATCC13124                          | 3.26 | 358 | TransportDB |
| Bacteria | <i>Clostridium</i>          | <i>perfringens</i> SM101                              | 2.96 | 323 | TransportDB |
| Bacteria | <i>Clostridium</i>          | <i>perfringens</i> str 13                             | 3.09 | 364 | TransportDB |
| Bacteria | <i>Chlorobium</i>           | <i>phaeobacteroides</i> BS1                           | 2.74 | 183 | TransportDB |
| Bacteria | <i>Chlorobium</i>           | <i>phaeobacteroides</i> DSM266                        | 3.13 | 177 | TransportDB |
| Bacteria | <i>Chlorobium</i>           | <i>phaeovibrioides</i> DSM265                         | 1.97 | 154 | TransportDB |
| Bacteria | <i>Clostridium</i>          | <i>phytofermentans</i> ISDg                           | 4.85 | 573 | TransportDB |
| Bacteria | <i>Candidatus</i>           | <i>phytoplasma aster yellows</i> witches'-broom AY-WB | 0.71 | 55  | TransportDB |
| Bacteria | <i>Candidatus</i>           | <i>phytoplasma australiense</i>                       | 0.88 | 53  | TransportDB |
| Bacteria | <i>Candidatus</i>           | <i>phytoplasma mali</i>                               | 0.6  | 48  | TransportDB |
| Bacteria | <i>Candidatus</i>           | <i>phytoplasma onion yellows</i> OY-M                 | 0.86 | 65  | TransportDB |
| Bacteria | <i>Candidatus</i>           | <i>phytoplasma solani</i>                             | 0.57 | 59  | TransportDB |
| Bacteria | <i>Chitinophaga</i>         | <i>pinensis</i> DSM2588                               | 9.13 | 355 | TransportDB |
| Bacteria | <i>Chlamydomphila</i>       | <i>pneumoniae</i> AR39                                | 1.23 | 90  | TransportDB |
| Bacteria | <i>Chlamydomphila</i>       | <i>pneumoniae</i> CWL029                              | 1.23 | 91  | TransportDB |
| Bacteria | <i>Chlamydomphila</i>       | <i>pneumoniae</i> J138                                | 1.23 | 90  | TransportDB |
| Bacteria | <i>Chlamydomphila</i>       | <i>pneumoniae</i> LPCoLN                              | 1.25 | 88  | TransportDB |
| Bacteria | <i>Chlamydomphila</i>       | <i>pneumoniae</i> TW183                               | 1.23 | 90  | TransportDB |
| Bacteria | <i>Candidatus</i>           | <i>portiera aleyrodidarum</i> BTBHRs                  | 0.35 | 20  | TransportDB |
| Bacteria | <i>Candidatus</i>           | <i>portiera aleyrodidarum</i>                         | 0.35 | 22  | TransportDB |

|          |                          | BTQVLC                                                 |      |     |             |
|----------|--------------------------|--------------------------------------------------------|------|-----|-------------|
| Bacteria | <i>Candidatus</i>        | <i>portiera aleyrodidarum</i> TV                       | 0.28 | 21  | TransportDB |
| Bacteria | <i>Coprothermobacter</i> | <i>proteolyticus</i> DSM5265                           | 1.42 | 171 | TransportDB |
| Bacteria | <i>Candidatus</i>        | <i>protochlamydia amoebophila</i> UWE25                | 2.41 | 151 | TransportDB |
| Bacteria | <i>Corynebacterium</i>   | <i>pseudotuberculosis</i> 1002                         | 2.34 | 270 | TransportDB |
| Bacteria | <i>Corynebacterium</i>   | <i>pseudotuberculosis</i> 106A                         | 2.28 | 254 | TransportDB |
| Bacteria | <i>Corynebacterium</i>   | <i>pseudotuberculosis</i> 258                          | 2.31 | 272 | TransportDB |
| Bacteria | <i>Corynebacterium</i>   | <i>pseudotuberculosis</i> 267                          | 2.34 | 273 | TransportDB |
| Bacteria | <i>Corynebacterium</i>   | <i>pseudotuberculosis</i> 31                           | 2.3  | 269 | TransportDB |
| Bacteria | <i>Corynebacterium</i>   | <i>pseudotuberculosis</i> 316                          | 2.31 | 268 | TransportDB |
| Bacteria | <i>Corynebacterium</i>   | <i>pseudotuberculosis</i> 3995                         | 2.34 | 270 | TransportDB |
| Bacteria | <i>Corynebacterium</i>   | <i>pseudotuberculosis</i> 4202A                        | 2.34 | 271 | TransportDB |
| Bacteria | <i>Corynebacterium</i>   | <i>pseudotuberculosis</i> C231                         | 2.33 | 261 | TransportDB |
| Bacteria | <i>Corynebacterium</i>   | <i>pseudotuberculosis</i> CIP5297                      | 2.32 | 265 | TransportDB |
| Bacteria | <i>Corynebacterium</i>   | <i>pseudotuberculosis</i> Cp162                        | 2.29 | 259 | TransportDB |
| Bacteria | <i>Corynebacterium</i>   | <i>pseudotuberculosis</i> FRC41                        | 2.34 | 289 | TransportDB |
| Bacteria | <i>Corynebacterium</i>   | <i>pseudotuberculosis</i> I19                          | 2.34 | 260 | TransportDB |
| Bacteria | <i>Corynebacterium</i>   | <i>pseudotuberculosis</i> P54B96                       | 2.34 | 264 | TransportDB |
| Bacteria | <i>Corynebacterium</i>   | <i>pseudotuberculosis</i> PAT10                        | 2.34 | 263 | TransportDB |
| Bacteria | <i>Chlamydomphila</i>    | <i>psittaci</i> 01DC11                                 | 1.17 | 96  | TransportDB |
| Bacteria | <i>Chlamydia</i>         | <i>psittaci</i> 01DC12                                 | 1.18 | 97  | TransportDB |
| Bacteria | <i>Chlamydomphila</i>    | <i>psittaci</i> 02DC15                                 | 1.17 | 96  | TransportDB |
| Bacteria | <i>Chlamydomphila</i>    | <i>psittaci</i> 08DC60                                 | 1.17 | 97  | TransportDB |
| Bacteria | <i>Chlamydomphila</i>    | <i>psittaci</i> 6BC                                    | 1.18 | 96  | TransportDB |
| Bacteria | <i>Chlamydia</i>         | <i>psittaci</i> 8455                                   | 1.18 | 101 | TransportDB |
| Bacteria | <i>Chlamydomphila</i>    | <i>psittaci</i> C-1998                                 | 1.17 | 96  | TransportDB |
| Bacteria | <i>Chlamydia</i>         | <i>psittaci</i> CP3                                    | 1.18 | 99  | TransportDB |
| Bacteria | <i>Chlamydia</i>         | <i>psittaci</i> GR9                                    | 1.15 | 95  | TransportDB |
| Bacteria | <i>Chlamydia</i>         | <i>psittaci</i> M56                                    | 1.17 | 92  | TransportDB |
| Bacteria | <i>Chlamydomphila</i>    | <i>psittaci</i> Mat116                                 | 1.16 | 92  | TransportDB |
| Bacteria | <i>Chlamydia</i>         | <i>psittaci</i> MN                                     | 1.18 | 95  | TransportDB |
| Bacteria | <i>Chlamydia</i>         | <i>psittaci</i> NJ1                                    | 1.17 | 96  | TransportDB |
| Bacteria | <i>Chlamydomphila</i>    | <i>psittaci</i> RD1                                    | 1.17 | 95  | TransportDB |
| Bacteria | <i>Chlamydia</i>         | <i>psittaci</i> VS225                                  | 1.16 | 95  | TransportDB |
| Bacteria | <i>Chlamydia</i>         | <i>psittaci</i> WC                                     | 1.18 | 96  | TransportDB |
| Bacteria | <i>Chlamydia</i>         | <i>psittaci</i> WSRTE30                                | 1.15 | 98  | TransportDB |
| Bacteria | <i>Colwellia</i>         | <i>psychrerythraea</i> 34H                             | 5.37 | 407 | TransportDB |
| Bacteria | <i>Candidatus</i>        | <i>punicispirillum marinum</i> IMCC1322                | 2.75 | 347 | TransportDB |
| Bacteria | <i>Corynebacterium</i>   | <i>resistens</i> DSM45100                              | 2.6  | 254 | TransportDB |
| Bacteria | <i>Candidatus</i>        | <i>rickettsia amblyommii</i> str GAT30V                | 1.48 | 120 | TransportDB |
| Bacteria | <i>Candidatus</i>        | <i>riesia pediculicola</i> USDA                        | 0.58 | 31  | TransportDB |
| Bacteria | <i>Citrobacter</i>       | <i>rodentium</i> ICC168                                | 5.44 | 672 | TransportDB |
| Bacteria | <i>Candidatus</i>        | <i>ruthia magna</i> str Cm<br><i>Calyptogena magna</i> | 1.16 | 57  | TransportDB |

|          |                             |                                                       |      |     |             |
|----------|-----------------------------|-------------------------------------------------------|------|-----|-------------|
| Bacteria | <i>Candidatus</i>           | <i>saccharibacteria</i> bacterium RAAC3_TM7_1         | 0.85 | 62  | TransportDB |
| Bacteria | <i>Candidatus</i>           | <i>saccharimonas aalborgensis</i>                     | 1.01 | 66  | TransportDB |
| Bacteria | <i>Clostridium</i>          | <i>saccharobutylicum</i> DSM13864                     | 5.11 | 494 | TransportDB |
| Bacteria | <i>Clostridium</i>          | <i>saccharolyticum</i> WM1                            | 4.66 | 645 | TransportDB |
| Bacteria | <i>Caldicellulosiruptor</i> | <i>saccharolyticus</i> DSM8903                        | 2.97 | 286 | TransportDB |
| Bacteria | <i>Clostridium</i>          | <i>saccharoperbutylaceticum</i> N14HMT                | 6.67 | 694 | TransportDB |
| Bacteria | <i>Cronobacter</i>          | <i>sakazakii</i> ATCCBAA894                           | 4.53 | 567 | TransportDB |
| Bacteria | <i>Cronobacter</i>          | <i>sakazakii</i> CMCC45402                            | 4.56 | 570 | TransportDB |
| Bacteria | <i>Cronobacter</i>          | <i>sakazakii</i> ES15                                 | 4.27 | 548 | TransportDB |
| Bacteria | <i>Cronobacter</i>          | <i>sakazakii</i> SP291                                | 4.52 | 559 | TransportDB |
| Bacteria | <i>Chromohalobacter</i>     | <i>salexigens</i> DSM3043                             | 3.7  | 514 | TransportDB |
| Bacteria | <i>Caulobacter</i>          | <i>segnis</i> ATCC21756                               | 4.66 | 298 | TransportDB |
| Bacteria | <i>Candidatus</i>           | <i>solibacter usitatus</i> Ellin6076                  | 9.97 | 526 | TransportDB |
| Bacteria | <i>Carnobacterium</i>       | <i>s174</i>                                           | 2.69 | 406 | TransportDB |
| Bacteria | <i>Coprococcus</i>          | <i>sART551</i>                                        | 3.12 | 227 | TransportDB |
| Bacteria | <i>Cyanothece</i>           | <i>sATCC51142</i>                                     | 5.46 | 383 | TransportDB |
| Bacteria | <i>Chelativorans</i>        | <i>sBNC1</i>                                          | 4.94 | 640 | TransportDB |
| Bacteria | <i>Clostridium</i>          | <i>sBNL1100</i>                                       | 4.61 | 410 | TransportDB |
| Bacteria | <i>Caulobacter</i>          | <i>sK31</i>                                           | 5.89 | 375 | TransportDB |
| Bacteria | <i>Cycloclasticus</i>       | <i>sP1</i>                                            | 2.36 | 221 | TransportDB |
| Bacteria | <i>Calothrix</i>            | <i>sPCC6303</i>                                       | 6.96 | 367 | TransportDB |
| Bacteria | <i>Cyanothece</i>           | <i>sPCC7424</i>                                       | 6.55 | 371 | TransportDB |
| Bacteria | <i>Cyanothece</i>           | <i>sPCC7425</i>                                       | 5.79 | 385 | TransportDB |
| Bacteria | <i>Calothrix</i>            | <i>sPCC7507</i>                                       | 7.02 | 436 | TransportDB |
| Bacteria | <i>Cyanothece</i>           | <i>sPCC7822</i>                                       | 7.84 | 408 | TransportDB |
| Bacteria | <i>Cyanothece</i>           | <i>sPCC8801</i>                                       | 4.79 | 296 | TransportDB |
| Bacteria | <i>Clostridium</i>          | <i>sSY8519</i>                                        | 2.84 | 255 | TransportDB |
| Bacteria | <i>Carnobacterium</i>       | <i>sWN1359</i>                                        | 2.5  | 329 | TransportDB |
| Bacteria | <i>Chloroflexus</i>         | <i>sY400fl</i>                                        | 5.27 | 397 | TransportDB |
| Bacteria | <i>Cylindrospermum</i>      | <i>stagnale</i> PCC7417                               | 7.61 | 374 | TransportDB |
| Bacteria | <i>Cyanobacterium</i>       | <i>stanieri</i> PCC7202                               | 3.16 | 239 | TransportDB |
| Bacteria | <i>Clostridium</i>          | <i>stercorarium</i> subsp <i>stercorarium</i> DSM8532 | 2.97 | 363 | TransportDB |
| Bacteria | <i>Clostridium</i>          | <i>sticklandii</i> DSM519                             | 2.72 | 310 | TransportDB |
| Bacteria | <i>Candidatus</i>           | <i>symbiobacter mobilis</i> CR                        | 2.99 | 157 | TransportDB |
| Bacteria | <i>Cupriavidus</i>          | <i>taiwanensis</i> LMG19424                           | 3.42 | 724 | TransportDB |
| Bacteria | <i>Cupriavidus</i>          | <i>taiwanensis</i> LMG19424                           | 6.48 | 700 | TransportDB |
| Bacteria | <i>Chlorobium</i>           | <i>tepidum</i> TLS                                    | 2.15 | 168 | TransportDB |
| Bacteria | <i>Corynebacterium</i>      | <i>terpenotabidum</i> Y11                             | 2.75 | 251 | TransportDB |
| Bacteria | <i>Comamonas</i>            | <i>testosteroni</i> CNB2                              | 5.37 | 645 | TransportDB |
| Bacteria | <i>Clostridium</i>          | <i>tetani</i> 12124569                                | 2.87 | 327 | TransportDB |
| Bacteria | <i>Clostridium</i>          | <i>tetani</i> E88                                     | 2.87 | 313 | TransportDB |
| Bacteria | <i>Chloroherpeton</i>       | <i>thalassium</i> ATCC35110                           | 3.29 | 211 | TransportDB |
| Bacteria | <i>Chroococcidiopsis</i>    | <i>thermalis</i> PCC7203                              | 6.69 | 511 | TransportDB |
| Bacteria | <i>Clostridium</i>          | <i>thermocellum</i> ATCC27405                         | 3.84 | 243 | TransportDB |

|          |                           |                                     |       |     |             |
|----------|---------------------------|-------------------------------------|-------|-----|-------------|
| Bacteria | <i>Clostridium</i>        | <i>thermocellum</i> DSM1313         | 3.56  | 237 | TransportDB |
| Bacteria | <i>Chlamydia</i>          | <i>trachomatis</i>                  | 10.43 | 888 | TransportDB |
| Bacteria | <i>Chlamydia</i>          | <i>trachomatis</i> 434Bu            | 1.04  | 89  | TransportDB |
| Bacteria | <i>Chlamydia</i>          | <i>trachomatis</i> A2497            | 1.05  | 90  | TransportDB |
| Bacteria | <i>Chlamydia</i>          | <i>trachomatis</i> A363             | 1.05  | 90  | TransportDB |
| Bacteria | <i>Chlamydia</i>          | <i>trachomatis</i> A5291            | 1.05  | 90  | TransportDB |
| Bacteria | <i>Chlamydia</i>          | <i>trachomatis</i> AHAR13           | 1.05  | 92  | TransportDB |
| Bacteria | <i>Chlamydia</i>          | <i>trachomatis</i> BJali20OT        | 1.04  | 87  | TransportDB |
| Bacteria | <i>Chlamydia</i>          | <i>trachomatis</i> BTZ1A828OT       | 1.04  | 87  | TransportDB |
| Bacteria | <i>Chlamydia</i>          | <i>trachomatis</i> CTW3             | 1.05  | 88  | TransportDB |
| Bacteria | <i>Chlamydia</i>          | <i>trachomatis</i> DEC              | 1.05  | 88  | TransportDB |
| Bacteria | <i>Chlamydia</i>          | <i>trachomatis</i> RCJ971           | 1.04  | 89  | TransportDB |
| Bacteria | <i>Chlamydia</i>          | <i>trachomatis</i> RCJs122          | 1.06  | 90  | TransportDB |
| Bacteria | <i>Chlamydia</i>          | <i>trachomatis</i> RCL255           | 1.04  | 89  | TransportDB |
| Bacteria | <i>Chlamydia</i>          | <i>trachomatis</i> RCL2s3           | 1.05  | 90  | TransportDB |
| Bacteria | <i>Chlamydia</i>          | <i>trachomatis</i> RCL2s46          | 1.04  | 89  | TransportDB |
| Bacteria | <i>Chlamydia</i>          | <i>trachomatis</i> Sweden2          | 1.04  | 88  | TransportDB |
| Bacteria | <i>Cronobacter</i>        | <i>turicensis</i> z3032             | 4.6   | 582 | TransportDB |
| Bacteria | <i>Corynebacterium</i>    | <i>ulcerans</i> 0102                | 2.58  | 318 | TransportDB |
| Bacteria | <i>Corynebacterium</i>    | <i>ulcerans</i> 809                 | 2.5   | 319 | TransportDB |
| Bacteria | <i>Corynebacterium</i>    | <i>ulcerans</i> BRAD22              | 2.61  | 317 | TransportDB |
| Bacteria | <i>Corynebacterium</i>    | <i>urealyticum</i> DSM7109          | 2.37  | 231 | TransportDB |
| Bacteria | <i>Corynebacterium</i>    | <i>urealyticum</i> DSM7111          | 2.32  | 229 | TransportDB |
| Bacteria | <i>Corynebacterium</i>    | <i>variabile</i> DSM44702           | 3.43  | 363 | TransportDB |
| Bacteria | <i>Candidatus</i>         | <i>vesicomycosocius okutanii</i> HA | 1.02  | 54  | TransportDB |
| Bacteria | <i>Chromobacterium</i>    | <i>violaceum</i> ATCC12472          | 4.75  | 481 | TransportDB |
| Bacteria | <i>Conexibacter</i>       | <i>woesei</i> DSM14684              | 6.36  | 772 | TransportDB |
| Bacteria | <i>Cycloclasticus</i>     | <i>zancles</i> 7ME                  | 2.66  | 249 | TransportDB |
| Bacteria | <i>Denitrovibrio</i>      | <i>acetiphilus</i> DSM12809         | 3.22  | 316 | TransportDB |
| Bacteria | <i>Desulfobacca</i>       | <i>acetoxidans</i> DSM11109         | 3.28  | 255 | TransportDB |
| Bacteria | <i>Desulfotomaculum</i>   | <i>acetoxidans</i> DSM771           | 4.55  | 308 | TransportDB |
| Bacteria | <i>Desulfosporosinus</i>  | <i>acidiphilus</i> SJ4              | 4.99  | 424 | TransportDB |
| Bacteria | <i>Delftia</i>            | <i>acidovorans</i> SPH1             | 6.77  | 797 | TransportDB |
| Bacteria | <i>Desulfovibrio</i>      | <i>aespoensis</i> Asp02             | 3.63  | 368 | TransportDB |
| Bacteria | <i>Desulfovibrio</i>      | <i>africanus</i> str WalvisBay      | 4.2   | 391 | TransportDB |
| Bacteria | <i>Desulfovibrio</i>      | <i>alaskensis</i> G20               | 3.73  | 389 | TransportDB |
| Bacteria | <i>Desulfurivibrio</i>    | <i>alkaliphilus</i> AHT2            | 3.1   | 251 | TransportDB |
| Bacteria | <i>Desulfatibacillum</i>  | <i>alkenivorans</i> AK01            | 6.52  | 469 | TransportDB |
| Bacteria | <i>Dechloromonas</i>      | <i>aromatica</i> RCB                | 4.5   | 406 | TransportDB |
| Bacteria | <i>Desulfobacterium</i>   | <i>autotrophicum</i> HRM2           | 5.66  | 667 | TransportDB |
| Bacteria | <i>Desulfomicrobium</i>   | <i>baculatum</i> DSM4028            | 3.94  | 423 | TransportDB |
| Bacteria | <i>Desulfarculus</i>      | <i>baarsii</i> DSM2075              | 3.66  | 277 | TransportDB |
| Bacteria | <i>Desulfotomaculum</i>   | <i>carboxydivorans</i> CO1SRB       | 2.89  | 236 | TransportDB |
| Bacteria | <i>Dickeya</i>            | <i>dadantii</i> 3937                | 4.92  | 692 | TransportDB |
| Bacteria | <i>Dickeya</i>            | <i>dadantii</i> Ech586              | 4.82  | 642 | TransportDB |
| Bacteria | <i>Dickeya</i>            | <i>dadantii</i> Ech703              | 4.68  | 679 | TransportDB |
| Bacteria | <i>Desulfitobacterium</i> | <i>dehalogenans</i> ATCC51507       | 4.32  | 415 | TransportDB |

|          |                           |                                                                  |      |     |             |
|----------|---------------------------|------------------------------------------------------------------|------|-----|-------------|
| Bacteria | <i>Deinococcus</i>        | <i>deserti</i> VCD115                                            | 3.86 | 370 | TransportDB |
| Bacteria | <i>Desulfovibrio</i>      | <i>desulfuricans</i> G20                                         | 3.73 | 355 | TransportDB |
| Bacteria | <i>Desulfovibrio</i>      | <i>desulfuricans</i> ND132                                       | 3.86 | 459 | TransportDB |
| Bacteria | <i>Deferribacter</i>      | <i>desulfuricans</i> SSM1                                        | 2.54 | 247 | TransportDB |
| Bacteria | <i>Deferribacter</i>      | <i>desulfuricans</i> subsp<br><i>desulfuricans</i> str ATCC27774 | 2.87 | 268 | TransportDB |
| Bacteria | <i>Desulfitobacterium</i> | <i>dichloroeliminans</i> LMGP21439                               | 3.62 | 351 | TransportDB |
| Bacteria | <i>Dehalococcoides</i>    | <i>ethenogenes</i> 195                                           | 1.47 | 115 | TransportDB |
| Bacteria | <i>Dyadobacter</i>        | <i>fermentans</i> DSM18053                                       | 6.97 | 320 | TransportDB |
| Bacteria | <i>Deinococcus</i>        | <i>geothermalis</i> DSM11300                                     | 3.25 | 337 | TransportDB |
| Bacteria | <i>Desulfotomaculum</i>   | <i>gibsoniae</i> DSM7213                                         | 4.86 | 321 | TransportDB |
| Bacteria | <i>Desulfovibrio</i>      | <i>gigas</i> DSM1382ATCC19364                                    | 3.80 | 331 | TransportDB |
| Bacteria | <i>Deinococcus</i>        | <i>gobiensis</i> I0                                              | 4.41 | 403 | TransportDB |
| Bacteria | <i>Desulfitobacterium</i> | <i>hafniense</i> DCB2                                            | 5.28 | 619 | TransportDB |
| Bacteria | <i>Desulfitobacterium</i> | <i>hafniense</i> Y51                                             | 5.73 | 660 | TransportDB |
| Bacteria | <i>Desulfovibrio</i>      | <i>hydrothermalis</i><br>AM13DSM14728                            | 3.71 | 387 | TransportDB |
| Bacteria | <i>Desulfurispirillum</i> | <i>indicum</i> S5                                                | 2.93 | 271 | TransportDB |
| Bacteria | <i>Desulfotomaculum</i>   | <i>kuznetsovii</i> DSM6115                                       | 3.6  | 269 | TransportDB |
| Bacteria | <i>Dehalogenimonas</i>    | <i>lykanthroporepellens</i> BLDC9                                | 1.69 | 124 | TransportDB |
| Bacteria | <i>Desulfovibrio</i>      | <i>magneticus</i> RS1                                            | 5.32 | 407 | TransportDB |
| Bacteria | <i>Deinococcus</i>        | <i>maricopensis</i> DSM21211                                     | 3.5  | 303 | TransportDB |
| Bacteria | <i>Dehalococcoides</i>    | <i>mccartyi</i> BTF08                                            | 1.45 | 117 | TransportDB |
| Bacteria | <i>Dehalococcoides</i>    | <i>mccartyi</i> DCMB5                                            | 1.43 | 119 | TransportDB |
| Bacteria | <i>Dehalococcoides</i>    | <i>mccartyi</i> GY50                                             | 1.41 | 116 | TransportDB |
| Bacteria | <i>Desulfosporosinus</i>  | <i>meridiei</i> DSM13257                                         | 4.87 | 499 | TransportDB |
| Bacteria | <i>Dichelobacter</i>      | <i>nodosus</i> VCS1703A                                          | 1.39 | 127 | TransportDB |
| Bacteria | <i>Desulfococcus</i>      | <i>oleovorans</i> Hxd3                                           | 3.94 | 238 | TransportDB |
| Bacteria | <i>Desulfosporosinus</i>  | <i>orientis</i> DSM765                                           | 5.86 | 572 | TransportDB |
| Bacteria | <i>Deinococcus</i>        | <i>peraridilitoris</i> DSM19664                                  | 4.51 | 392 | TransportDB |
| Bacteria | <i>Desulfovibrio</i>      | <i>piezophilus</i> C1TLV30                                       | 3.65 | 382 | TransportDB |
| Bacteria | <i>Desulfobulbus</i>      | <i>propionicus</i> DSM2032                                       | 3.85 | 309 | TransportDB |
| Bacteria | <i>Deinococcus</i>        | <i>proteolyticus</i> MRP                                         | 2.89 | 223 | TransportDB |
| Bacteria | <i>Desulfotalea</i>       | <i>psychrophila</i> Lsv54                                        | 3.66 | 370 | TransportDB |
| Bacteria | <i>Deinococcus</i>        | <i>radiodurans</i> R1                                            | 3.28 | 283 | TransportDB |
| Bacteria | <i>Desulfotomaculum</i>   | <i>reducens</i> MI1                                              | 3.61 | 329 | TransportDB |
| Bacteria | <i>Desulfohalobium</i>    | <i>retbaense</i> DSM5692                                         | 2.91 | 297 | TransportDB |
| Bacteria | <i>Desulfotomaculum</i>   | <i>ruminis</i> DSM2154                                           | 3.97 | 396 | TransportDB |
| Bacteria | <i>Desulfovibrio</i>      | <i>saalexigens</i> DSM2638                                       | 4.29 | 502 | TransportDB |
| Bacteria | <i>Dactylococcopsis</i>   | <i>salina</i> PCC8305                                            | 3.78 | 265 | TransportDB |
| Bacteria | <i>Dinoroseobacter</i>    | <i>shibae</i> DFL12                                              | 4.42 | 564 | TransportDB |
| Bacteria | <i>Dehalococcoides</i>    | <i>sBAV1</i>                                                     | 1.34 | 113 | TransportDB |
| Bacteria | <i>Dehalococcoides</i>    | <i>sCBDB1</i>                                                    | 1.4  | 121 | TransportDB |
| Bacteria | <i>Dehalobacter</i>       | <i>sCF</i>                                                       | 3.09 | 222 | TransportDB |
| Bacteria | <i>Delftia</i>            | <i>sCs14</i>                                                     | 6.69 | 813 | TransportDB |
| Bacteria | <i>Dehalobacter</i>       | <i>sDCA</i>                                                      | 3.07 | 227 | TransportDB |
| Bacteria | <i>Dehalococcoides</i>    | <i>sGT</i>                                                       | 1.36 | 114 | TransportDB |

|          |                           |                                                  |      |     |             |
|----------|---------------------------|--------------------------------------------------|------|-----|-------------|
| Bacteria | <i>Dehalococcoides</i>    | <i>sVS</i>                                       | 1.41 | 119 | TransportDB |
| Bacteria | <i>Dechlorosoma</i>       | <i>suillum</i> PS                                | 3.81 | 329 | TransportDB |
| Bacteria | <i>Desulfocapsa</i>       | <i>sulfexigens</i> DSM10523                      | 4.02 | 402 | TransportDB |
| Bacteria | <i>Desulfurobacterium</i> | <i>thermolithotrophum</i><br>DSM11699            | 1.54 | 115 | TransportDB |
| Bacteria | <i>Dictyoglomus</i>       | <i>thermophilum</i> H612                         | 1.96 | 284 | TransportDB |
| Bacteria | <i>Desulfomonile</i>      | <i>tiedjei</i> DSM6799                           | 6.53 | 541 | TransportDB |
| Bacteria | <i>Desulfobacula</i>      | <i>toluolica</i> Tol2                            | 5.2  | 431 | TransportDB |
| Bacteria | <i>Dictyoglomus</i>       | <i>turgidum</i> DSM6724                          | 1.86 | 254 | TransportDB |
| Bacteria | <i>Desulfovibrio</i>      | <i>vulgaris</i> DP4                              | 3.66 | 352 | TransportDB |
| Bacteria | <i>Desulfovibrio</i>      | <i>vulgaris</i> RCH1                             | 3.73 | 348 | TransportDB |
| Bacteria | <i>Desulfovibrio</i>      | <i>vulgaris</i> str Hildenborough                | 3.77 | 343 | TransportDB |
| Bacteria | <i>Desulfovibrio</i>      | <i>vulgaris</i> str MiyazakiF                    | 4.04 | 372 | TransportDB |
| Bacteria | <i>Dickeya</i>            | <i>zeae</i> Ech1591                              | 4.81 | 629 | TransportDB |
| Bacteria | <i>Bordetella</i>         | <i>Eubacterium</i> T287                          | 1.97 | 163 | TransportDB |
| Bacteria | <i>Enterobacter</i>       | <i>aerogenes</i> EA1509E                         | 5.59 | 790 | TransportDB |
| Bacteria | <i>Enterobacter</i>       | <i>aerogenes</i> KCTC2190                        | 5.28 | 771 | TransportDB |
| Bacteria | <i>Erwinia</i>            | <i>amylovora</i> ATCC49946                       | 3.91 | 441 | TransportDB |
| Bacteria | <i>Erwinia</i>            | <i>amylovora</i> CFBP1430                        | 3.83 | 446 | TransportDB |
| Bacteria | <i>Exiguobacterium</i>    | <i>antarcticum</i> B7                            | 2.82 | 347 | TransportDB |
| Bacteria | <i>Enterobacter</i>       | <i>asburiae</i> LF7a                             | 5.01 | 758 | TransportDB |
| Bacteria | <i>Enterobacter</i>       | <i>bacterium</i> str FGI57                       | 4.76 | 689 | TransportDB |
| Bacteria | <i>Erwinia</i>            | <i>billingiae</i> Eb661                          | 5.37 | 805 | TransportDB |
| Bacteria | <i>Ehrlichia</i>          | <i>canis</i> str Jake                            | 1.32 | 74  | TransportDB |
| Bacteria | <i>Enterococcus</i>       | <i>casseliflavus</i> EC20                        | 3.43 | 564 | TransportDB |
| Bacteria | <i>Ehrlichia</i>          | <i>chaffeensis</i> str Arkansas                  | 1.18 | 73  | TransportDB |
| Bacteria | <i>Enterobacter</i>       | <i>cloacae</i> EcWSU1                            | 4.8  | 704 | TransportDB |
| Bacteria | <i>Enterobacter</i>       | <i>cloacae</i> SCF1                              | 4.81 | 736 | TransportDB |
| Bacteria | <i>Enterobacter</i>       | <i>cloacae</i> subsp <i>cloacae</i><br>ATCC13047 | 5.6  | 736 | TransportDB |
| Bacteria | <i>Enterobacter</i>       | <i>cloacae</i> subsp <i>cloacae</i><br>ENHKU01   | 4.73 | 668 | TransportDB |
| Bacteria | <i>Enterobacter</i>       | <i>cloacae</i> subsp <i>cloacae</i><br>NCTC9394  | 4.91 | 574 | TransportDB |
| Bacteria | <i>Enterobacter</i>       | <i>cloacae</i> subsp <i>dissolvens</i><br>SDM    | 4.97 | 719 | TransportDB |
| Bacteria | <i>Escherichia</i>        | <i>coli</i> 042                                  | 5.36 | 637 | TransportDB |
| Bacteria | <i>Escherichia</i>        | <i>coli</i> 536                                  | 4.94 | 659 | TransportDB |
| Bacteria | <i>Escherichia</i>        | <i>coli</i> 55989                                | 5.15 | 631 | TransportDB |
| Bacteria | <i>Escherichia</i>        | <i>coli</i> ABU83972                             | 5.13 | 672 | TransportDB |
| Bacteria | <i>Escherichia</i>        | <i>coli</i> APECO1                               | 5.5  | 668 | TransportDB |
| Bacteria | <i>Escherichia</i>        | <i>coli</i> APECO78                              | 4.8  | 635 | TransportDB |
| Bacteria | <i>Escherichia</i>        | <i>coli</i> ATCC8739                             | 4.75 | 615 | TransportDB |
| Bacteria | <i>Escherichia</i>        | <i>coli</i> BL21 DE3                             | 4.56 | 604 | TransportDB |
| Bacteria | <i>Escherichia</i>        | <i>coli</i> BL21 Gold DE3pLysSAG                 | 4.57 | 605 | TransportDB |
| Bacteria | <i>Escherichia</i>        | <i>coli</i> B str REL606                         | 4.63 | 605 | TransportDB |
| Bacteria | <i>Escherichia</i>        | <i>coli</i> BW2952                               | 4.58 | 592 | TransportDB |
| Bacteria | <i>Escherichia</i>        | <i>coli</i> CFT073                               | 5.23 | 664 | TransportDB |

|          |                       |                                   |      |     |             |
|----------|-----------------------|-----------------------------------|------|-----|-------------|
| Bacteria | <i>Escherichia</i>    | <i>coli</i> DH1                   | 4.62 | 614 | TransportDB |
| Bacteria | <i>Escherichia</i>    | <i>coli</i> E24377A               | 5.25 | 623 | TransportDB |
| Bacteria | <i>Escherichia</i>    | <i>coli</i> ED1a                  | 5.21 | 648 | TransportDB |
| Bacteria | <i>Escherichia</i>    | <i>coli</i> ETECH10407            | 5.33 | 616 | TransportDB |
| Bacteria | <i>Escherichia</i>    | <i>coli</i> HS                    | 4.64 | 603 | TransportDB |
| Bacteria | <i>Escherichia</i>    | <i>coli</i> IAI1                  | 4.7  | 615 | TransportDB |
| Bacteria | <i>Escherichia</i>    | <i>coli</i> IAI39                 | 5.13 | 648 | TransportDB |
| Bacteria | <i>Escherichia</i>    | <i>coli</i> IHE3034               | 5.11 | 652 | TransportDB |
| Bacteria | <i>Escherichia</i>    | <i>coli</i> JJ1886                | 5.31 | 696 | TransportDB |
| Bacteria | <i>Escherichia</i>    | <i>coli</i> KO11FL                | 5.03 | 620 | TransportDB |
| Bacteria | <i>Escherichia</i>    | <i>coli</i> LF82                  | 4.77 | 650 | TransportDB |
| Bacteria | <i>Escherichia</i>    | <i>coli</i> LY180                 | 4.84 | 607 | TransportDB |
| Bacteria | <i>Escherichia</i>    | <i>coli</i> NA114                 | 4.97 | 675 | TransportDB |
| Bacteria | <i>Escherichia</i>    | <i>coli</i> O103                  | 5.52 | 621 | TransportDB |
| Bacteria | <i>Escherichia</i>    | <i>coli</i> O104                  | 5.39 | 637 | TransportDB |
| Bacteria | <i>Escherichia</i>    | <i>coli</i> O104                  | 5.44 | 644 | TransportDB |
| Bacteria | <i>Escherichia</i>    | <i>coli</i> O104                  | 5.44 | 643 | TransportDB |
| Bacteria | <i>Escherichia</i>    | <i>coli</i> O111                  | 5.77 | 617 | TransportDB |
| Bacteria | <i>Escherichia</i>    | <i>coli</i> O127                  | 5.07 | 620 | TransportDB |
| Bacteria | <i>Escherichia</i>    | <i>coli</i> SMS35                 | 5.22 | 673 | TransportDB |
| Bacteria | <i>Escherichia</i>    | <i>coli</i> str clone Di14        | 5.04 | 662 | TransportDB |
| Bacteria | <i>Escherichia</i>    | <i>coli</i> str clone Di2         | 5.04 | 662 | TransportDB |
| Bacteria | <i>Escherichia</i>    | <i>coli</i> str K12 substr DH10B  | 4.69 | 600 | TransportDB |
| Bacteria | <i>Escherichia</i>    | <i>coli</i> str K12 substr MDS42  | 3.98 | 547 | TransportDB |
| Bacteria | <i>Escherichia</i>    | <i>coli</i> str K12 substr MG1655 | 4.64 | 601 | TransportDB |
| Bacteria | <i>Escherichia</i>    | <i>coli</i> str K12 substr W3110  | 4.65 | 608 | TransportDB |
| Bacteria | <i>Escherichia</i>    | <i>coli</i> UM146                 | 5.11 | 668 | TransportDB |
| Bacteria | <i>Escherichia</i>    | <i>coli</i> UMN026                | 5.36 | 677 | TransportDB |
| Bacteria | <i>Escherichia</i>    | <i>coli</i> UMNK88                | 5.67 | 645 | TransportDB |
| Bacteria | <i>Escherichia</i>    | <i>coli</i> UTI89                 | 5.18 | 665 | TransportDB |
| Bacteria | <i>Escherichia</i>    | <i>coli</i> W                     | 5.01 | 620 | TransportDB |
| Bacteria | <i>Escherichia</i>    | <i>coli</i> Xuzhou21              | 5.52 | 644 | TransportDB |
| Bacteria | <i>Eubacterium</i>    | <i>eligens</i> ATCC27750          | 2.83 | 270 | TransportDB |
| Bacteria | <i>Enterococcus</i>   | <i>faecalis</i> 62                | 3.13 | 465 | TransportDB |
| Bacteria | <i>Enterococcus</i>   | <i>faecalis</i> D32               | 3.06 | 426 | TransportDB |
| Bacteria | <i>Enterococcus</i>   | <i>faecalis</i> OG1RF             | 2.74 | 429 | TransportDB |
| Bacteria | <i>Enterococcus</i>   | <i>faecalis</i> str Symbioflor1   | 2.81 | 436 | TransportDB |
| Bacteria | <i>Enterococcus</i>   | <i>faecalis</i> V583              | 3.36 | 459 | TransportDB |
| Bacteria | <i>Enterococcus</i>   | <i>faecium</i> Aus0004            | 3.02 | 403 | TransportDB |
| Bacteria | <i>Escherichia</i>    | <i>fergusonii</i> ATCC35469       | 4.64 | 585 | TransportDB |
| Bacteria | <i>Ethanoligenens</i> | <i>harbinense</i> YUAN3           | 3.01 | 292 | TransportDB |
| Bacteria | <i>Enterococcus</i>   | <i>hirae</i> ATCC9790             | 2.86 | 358 | TransportDB |
| Bacteria | <i>Edwardsiella</i>   | <i>ictaluri</i> 93146             | 3.81 | 428 | TransportDB |
| Bacteria | <i>Eggerthella</i>    | <i>lenta</i> DSM2243              | 3.63 | 359 | TransportDB |
| Bacteria | <i>Eubacterium</i>    | <i>limosum</i> KIST612            | 4.32 | 499 | TransportDB |
| Bacteria | <i>Erythrobacter</i>  | <i>litoralis</i> HTCC2594         | 3.05 | 181 | TransportDB |
| Bacteria | <i>Elusimicrobium</i> | <i>minutum</i> Pei191             | 1.64 | 113 | TransportDB |
| Bacteria | <i>Enterococcus</i>   | <i>mundtii</i> QU25               | 3.35 | 428 | TransportDB |

|          |                          |                                                          |      |     |             |
|----------|--------------------------|----------------------------------------------------------|------|-----|-------------|
| Bacteria | <i>Ehrlichia</i>         | <i>muris</i> AS145                                       | 1.2  | 73  | TransportDB |
| Bacteria | <i>Emticicia</i>         | <i>oligotrophica</i> DSM17448                            | 5.22 | 258 | TransportDB |
| Bacteria | <i>Erwinia</i>           | <i>pyrifoliae</i> DSM12163                               | 4.07 | 458 | TransportDB |
| Bacteria | <i>Erwinia</i>           | <i>pyrifoliae</i> Ep196                                  | 4.07 | 442 | TransportDB |
| Bacteria | <i>Eubacterium</i>       | <i>rectale</i> ATCC33656                                 | 3.45 | 320 | TransportDB |
| Bacteria | <i>Eubacterium</i>       | <i>rectale</i> DSM17629                                  | 3.34 | 279 | TransportDB |
| Bacteria | <i>Eubacterium</i>       | <i>rectale</i> M1041                                     | 3.7  | 279 | TransportDB |
| Bacteria | <i>Erysipelothrix</i>    | <i>rhusiopathiae</i> str Fujisawa                        | 1.79 | 247 | TransportDB |
| Bacteria | <i>Erysipelothrix</i>    | <i>rhusiopathiae</i> SY1027                              | 1.75 | 249 | TransportDB |
| Bacteria | <i>Ehrlichia</i>         | <i>ruminantium</i> str Gardel                            | 1.5  | 72  | TransportDB |
| Bacteria | <i>Ehrlichia</i>         | <i>ruminantium</i> str Welgevonden                       | 1.51 | 74  | TransportDB |
| Bacteria | <i>Enterobacter</i>      | <i>sakazakii</i> ATCC BAA-894                            | 4.37 | 549 | TransportDB |
| Bacteria | <i>Arthrosira</i>        | <i>bacteriumphylo</i> type RsD17                         | 2.3  | 46  | TransportDB |
| Bacteria | <i>Sulfuricurvum</i>     | <i>RIFRC1</i>                                            | 2.36 | 161 | TransportDB |
| Bacteria | <i>Exiguobacterium</i>   | <i>sibiricum</i> 25515                                   | 3.04 | 380 | TransportDB |
| Bacteria | <i>Eubacterium</i>       | <i>siraeum</i> 703                                       | 2.94 | 210 | TransportDB |
| Bacteria | <i>Eubacterium</i>       | <i>siraeum</i> V10Sc8a                                   | 2.84 | 209 | TransportDB |
| Bacteria | <i>Enterobacter</i>      | <i>s638</i>                                              | 4.68 | 662 | TransportDB |
| Bacteria | <i>Enterococcus</i>      | <i>s7L76</i>                                             | 3.1  | 363 | TransportDB |
| Bacteria | <i>Exiguobacterium</i>   | <i>sAT1b</i>                                             | 3.0  | 387 | TransportDB |
| Bacteria | <i>Erwinia</i>           | <i>sEjp617</i>                                           | 3.96 | 456 | TransportDB |
| Bacteria | <i>Exiguobacterium</i>   | <i>sMH3</i>                                              | 3.16 | 413 | TransportDB |
| Bacteria | <i>Enterobacter</i>      | <i>sR4368</i>                                            | 5.16 | 695 | TransportDB |
| Bacteria | <i>Eggerthella</i>       | <i>sYY7918</i>                                           | 3.12 | 282 | TransportDB |
| Bacteria | <i>Edwardsiella</i>      | <i>tarda</i> C07087                                      | 3.86 | 473 | TransportDB |
| Bacteria | <i>Edwardsiella</i>      | <i>tarda</i> EIB202                                      | 3.8  | 470 | TransportDB |
| Bacteria | <i>Edwardsiella</i>      | <i>tarda</i> FL660                                       | 3.73 | 466 | TransportDB |
| Bacteria | <i>Erwinia</i>           | <i>tasmaniensis</i> Et199                                | 4.07 | 503 | TransportDB |
| Bacteria | <i>Echinicola</i>        | <i>vietnamensis</i> DSM17526                             | 5.61 | 275 | TransportDB |
| Bacteria | <i>Fibrella</i>          | <i>aestuarina</i> BUZ2                                   | 6.94 | 326 | TransportDB |
| Bacteria | <i>Frankia</i>           | <i>alni</i> ACN14a                                       | 7.5  | 433 | TransportDB |
| Bacteria | <i>Filifactor</i>        | <i>alocis</i> ATCC35896                                  | 1.93 | 179 | TransportDB |
| Bacteria | <i>Frateuria</i>         | <i>aurantia</i> DSM6220                                  | 3.6  | 270 | TransportDB |
| Bacteria | <i>Flavobacteriaceae</i> | <i>bacterium</i> 351910                                  | 2.77 | 142 | TransportDB |
| Bacteria | <i>Ferrimonas</i>        | <i>balearica</i> DSM9799                                 | 4.28 | 379 | TransportDB |
| Bacteria | <i>Flavobacterium</i>    | <i>branchiophilum</i> FL15                               | 3.56 | 147 | TransportDB |
| Bacteria | <i>Francisella</i>       | <i>cnovicida</i> 3523                                    | 1.95 | 229 | TransportDB |
| Bacteria | <i>Francisella</i>       | <i>cnovicida</i> Fx1                                     | 1.91 | 232 | TransportDB |
| Bacteria | <i>Flavobacterium</i>    | <i>columnare</i> ATCC49512                               | 3.16 | 152 | TransportDB |
| Bacteria | <i>Flavobacterium</i>    | <i>indicum</i> GPTSA1009                                 | 2.99 | 161 | TransportDB |
| Bacteria | <i>Flavobacterium</i>    | <i>johnsoniae</i> UW101                                  | 6.1  | 281 | TransportDB |
| Bacteria | <i>Flexibacter</i>       | <i>litoralis</i> DSM6794                                 | 4.92 | 170 | TransportDB |
| Bacteria | <i>Fingoldia</i>         | <i>magna</i> ATCC29328                                   | 1.99 | 257 | TransportDB |
| Bacteria | <i>Francisella</i>       | <i>noatunensis</i> subsp <i>orientalis</i><br>LADL07285A | 1.86 | 183 | TransportDB |
| Bacteria | <i>Francisella</i>       | <i>noatunensis</i> subsp <i>orientalis</i><br>str Toba04 | 1.85 | 179 | TransportDB |

|          |                         |                                                         |      |     |             |
|----------|-------------------------|---------------------------------------------------------|------|-----|-------------|
| Bacteria | <i>Fervidobacterium</i> | <i>nodosum</i> Rt17B1                                   | 1.95 | 224 | TransportDB |
| Bacteria | <i>Francisella</i>      | <i>novicida</i> U112                                    | 1.91 | 225 | TransportDB |
| Bacteria | <i>Fusobacterium</i>    | <i>nucleatum</i> subsp <i>animalis</i> 4_8              | 2.28 | 273 | TransportDB |
| Bacteria | <i>Fusobacterium</i>    | <i>nucleatum</i> subsp <i>nucleatum</i> ATCC25586       | 2.17 | 286 | TransportDB |
| Bacteria | <i>Fusobacterium</i>    | <i>nucleatum</i> subsp <i>vincentii</i> 3_1_36A2        | 2.27 | 281 | TransportDB |
| Bacteria | <i>Fervidobacterium</i> | <i>pennivorans</i> DSM9078                              | 2.17 | 256 | TransportDB |
| Bacteria | <i>Francisella</i>      | <i>philomiragia</i> subsp <i>philomiragia</i> ATCC25017 | 2.05 | 236 | TransportDB |
| Bacteria | <i>Faecalibacterium</i> | <i>prausnitzii</i> L26                                  | 3.32 | 316 | TransportDB |
| Bacteria | <i>Faecalibacterium</i> | <i>prausnitzii</i> SL33                                 | 3.21 | 262 | TransportDB |
| Bacteria | <i>Flavobacterium</i>   | <i>psychrophilum</i> JIP0286                            | 2.86 | 152 | TransportDB |
| Bacteria | <i>Flexistipes</i>      | <i>sinusarabici</i> DSM4947                             | 2.53 | 274 | TransportDB |
| Bacteria | <i>Frankia</i>          | <i>sCcl3</i>                                            | 5.43 | 253 | TransportDB |
| Bacteria | <i>Frankia</i>          | <i>sEAN1pec</i>                                         | 8.98 | 507 | TransportDB |
| Bacteria | <i>Frankia</i>          | <i>sEul1c</i>                                           | 8.82 | 599 | TransportDB |
| Bacteria | <i>Francisella</i>      | <i>sTX077308</i>                                        | 2.04 | 244 | TransportDB |
| Bacteria | <i>Fibrobacter</i>      | <i>succinogenes</i> subsp <i>succinogenes</i> S85       | 3.84 | 194 | TransportDB |
| Bacteria | <i>Frankia</i>          | <i>symbiont</i> of <i>datiscaglomerata</i>              | 5.34 | 300 | TransportDB |
| Bacteria | <i>Fluviicola</i>       | <i>taffensis</i> DSM16823                               | 4.63 | 184 | TransportDB |
| Bacteria | <i>Francisella</i>      | <i>tularensis novicida</i> U112                         | 1.91 | 216 | TransportDB |
| Bacteria | <i>Francisella</i>      | <i>tularensis</i> subsp <i>holarctica</i> F92           | 1.89 | 203 | TransportDB |
| Bacteria | <i>Francisella</i>      | <i>tularensis</i> subsp <i>holarctica</i> FSC200        | 1.89 | 168 | TransportDB |
| Bacteria | <i>Francisella</i>      | <i>tularensis</i> subsp <i>holarctica</i> FTNF00200     | 1.89 | 167 | TransportDB |
| Bacteria | <i>Francisella</i>      | <i>tularensis</i> subsp <i>holarctica</i> LVS           | 1.9  | 210 | TransportDB |
| Bacteria | <i>Francisella</i>      | <i>tularensis</i> subsp <i>holarctica</i> OSU18         | 1.9  | 162 | TransportDB |
| Bacteria | <i>Francisella</i>      | <i>tularensis</i> subsp <i>mediasiatica</i> FSC147      | 1.89 | 171 | TransportDB |
| Bacteria | <i>Francisella</i>      | <i>tularensis</i> subsp <i>tularensis</i> FSC198        | 1.89 | 182 | TransportDB |
| Bacteria | <i>Francisella</i>      | <i>tularensis</i> subsp <i>tularensis</i> NE061598      | 1.89 | 192 | TransportDB |
| Bacteria | <i>Francisella</i>      | <i>tularensis</i> subsp <i>tularensis</i> SCHUS4        | 1.89 | 182 | TransportDB |
| Bacteria | <i>Francisella</i>      | <i>tularensis</i> subsp <i>tularensis</i> TI0902        | 1.89 | 184 | TransportDB |
| Bacteria | <i>Francisella</i>      | <i>tularensis</i> subsp <i>tularensis</i> TIGB03        | 1.97 | 187 | TransportDB |
| Bacteria | <i>Francisella</i>      | <i>tularensis</i> subsp <i>tularensis</i> WY963418      | 1.9  | 190 | TransportDB |
| Bacteria | <i>Gallibacterium</i>   | <i>anatis</i> UMN179                                    | 2.69 | 314 | TransportDB |
| Bacteria | <i>Gemmatimonas</i>     | <i>aurantiaca</i> T27                                   | 4.64 | 286 | TransportDB |

|          |                            |                                       |      |     |             |
|----------|----------------------------|---------------------------------------|------|-----|-------------|
| Bacteria | <i>Geobacter</i>           | <i>bemidjiensis</i> Bem               | 4.62 | 337 | TransportDB |
| Bacteria | <i>Granulibacter</i>       | <i>bethesdensis</i> CGDNIH1           | 2.71 | 225 | TransportDB |
| Bacteria | <i>Gordonia</i>            | <i>bronchialis</i> DSM43247           | 5.29 | 398 | TransportDB |
| Bacteria | <i>Gallionella</i>         | <i>capsiferriformans</i> ES2          | 3.16 | 224 | TransportDB |
| Bacteria | <i>Geobacter</i>           | <i>daltonii</i> FRC32                 | 4.30 | 309 | TransportDB |
| Bacteria | <i>Gluconacetobacter</i>   | <i>diazotrophicus</i> PAI5            | 4.0  | 363 | TransportDB |
| Bacteria | <i>Gramella</i>            | <i>forsetii</i> KT0803                | 3.8  | 228 | TransportDB |
| Bacteria | <i>Gammaproteobacteria</i> | <i>gamma</i> HdN1                     | 4.59 | 236 | TransportDB |
| Bacteria | <i>Geobacillus</i>         | <i>kaustophilus</i> HTA426            | 3.59 | 378 | TransportDB |
| Bacteria | <i>Gloeobacter</i>         | <i>kilaeensis</i> JS1                 | 4.72 | 294 | TransportDB |
| Bacteria | <i>Geobacter</i>           | <i>lovleyi</i> SZ                     | 3.99 | 306 | TransportDB |
| Bacteria | <i>Granulicella</i>        | <i>mallensis</i> MP5ACTX8             | 6.24 | 292 | TransportDB |
| Bacteria | <i>Geobacter</i>           | <i>metallireducens</i> GS15           | 4.01 | 265 | TransportDB |
| Bacteria | <i>Glaciecola</i>          | <i>nitratireducens</i> FR1064         | 4.13 | 308 | TransportDB |
| Bacteria | <i>Geodermatophilus</i>    | <i>obscurus</i> DSM43160              | 5.32 | 394 | TransportDB |
| Bacteria | <i>Gluconobacter</i>       | <i>oxydans</i> 621H                   | 2.92 | 254 | TransportDB |
| Bacteria | <i>Gluconobacter</i>       | <i>oxydans</i> H24                    | 3.82 | 329 | TransportDB |
| Bacteria | <i>Gordonibacter</i>       | <i>pamelaee</i> 7101b                 | 3.61 | 228 | TransportDB |
| Bacteria | <i>Gordonia</i>            | <i>polyisoprenivorans</i> VH2         | 5.84 | 512 | TransportDB |
| Bacteria | <i>Glaciecola</i>          | <i>psychrophila</i> 170               | 5.41 | 398 | TransportDB |
| Bacteria | <i>Glaciecola</i>          | <i>s4H37YE5</i>                       | 5.39 | 371 | TransportDB |
| Bacteria | <i>Geobacillus</i>         | <i>sC56T3</i>                         | 3.65 | 403 | TransportDB |
| Bacteria | <i>Geobacillus</i>         | <i>sGHH01</i>                         | 3.58 | 401 | TransportDB |
| Bacteria | <i>Geobacillus</i>         | <i>sJF8</i>                           | 3.49 | 403 | TransportDB |
| Bacteria | <i>Gordonia</i>            | <i>sKTR9</i>                          | 5.89 | 478 | TransportDB |
| Bacteria | <i>Geobacter</i>           | <i>sM18</i>                           | 5.28 | 367 | TransportDB |
| Bacteria | <i>Geobacter</i>           | <i>sM21</i>                           | 4.75 | 314 | TransportDB |
| Bacteria | <i>Geitlerinema</i>        | <i>sPCC7407</i>                       | 4.68 | 304 | TransportDB |
| Bacteria | <i>Gloeocapsa</i>          | <i>sPCC7428</i>                       | 5.88 | 487 | TransportDB |
| Bacteria | <i>Geobacillus</i>         | <i>sWCH70</i>                         | 3.51 | 334 | TransportDB |
| Bacteria | <i>Geobacillus</i>         | <i>sY412MC52</i>                      | 3.67 | 387 | TransportDB |
| Bacteria | <i>Geobacillus</i>         | <i>sY412MC61</i>                      | 3.67 | 387 | TransportDB |
| Bacteria | <i>Geobacillus</i>         | <i>sY41MC1</i>                        | 3.91 | 453 | TransportDB |
| Bacteria | <i>Geobacter</i>           | <i>sulfurreducens</i> KN400           | 3.71 | 343 | TransportDB |
| Bacteria | <i>Geobacter</i>           | <i>sulfurreducens</i> PCA             | 3.81 | 342 | TransportDB |
| Bacteria | <i>Geobacillus</i>         | <i>thermodenitrificans</i> NG802      | 3.61 | 437 | TransportDB |
| Bacteria | <i>Geobacillus</i>         | <i>thermoglucoisidarius</i> C56YS93   | 3.99 | 443 | TransportDB |
| Bacteria | <i>Geobacillus</i>         | <i>thermoleovorans</i><br>CCB_US3_UF5 | 3.6  | 388 | TransportDB |
| Bacteria | <i>Granulicella</i>        | <i>tundricola</i> MP5ACTX9            | 5.5  | 270 | TransportDB |
| Bacteria | <i>Geobacter</i>           | <i>uraniireducens</i> Rf4             | 5.14 | 331 | TransportDB |
| Bacteria | <i>Gardnerella</i>         | <i>vaginalis</i> 40905                | 1.62 | 180 | TransportDB |
| Bacteria | <i>Gardnerella</i>         | <i>vaginalis</i> ATCC14019            | 1.67 | 219 | TransportDB |
| Bacteria | <i>Gardnerella</i>         | <i>vaginalis</i> HMP9231              | 1.73 | 224 | TransportDB |
| Bacteria | <i>Gloeobacter</i>         | <i>violaceus</i> PCC7421              | 4.66 | 284 | TransportDB |
| Bacteria | <i>Gluconacetobacter</i>   | <i>xylinus</i> NBRC3288               | 3.51 | 273 | TransportDB |
| Bacteria | <i>Helicobacter</i>        | <i>acinonychis</i> str Sheeba         | 1.56 | 135 | TransportDB |
| Bacteria | <i>Herminiimonas</i>       | <i>arsenicooxydans</i>                | 3.42 | 339 | TransportDB |

|          |                          |                                |      |     |             |
|----------|--------------------------|--------------------------------|------|-----|-------------|
| Bacteria | <i>Herpetosiphon</i>     | <i>aurantiacus</i> DSM785      | 6.79 | 417 | TransportDB |
| Bacteria | <i>Hirschia</i>          | <i>baltica</i> ATCC49814       | 3.54 | 238 | TransportDB |
| Bacteria | <i>Helicobacter</i>      | <i>bizzozeronii</i> CIII1      | 1.81 | 124 | TransportDB |
| Bacteria | <i>Helicobacter</i>      | <i>cetorum</i> MIT007128       | 1.96 | 120 | TransportDB |
| Bacteria | <i>Helicobacter</i>      | <i>cetorum</i> MIT995656       | 1.85 | 129 | TransportDB |
| Bacteria | <i>Hahella</i>           | <i>chejuensis</i> KCTC2396     | 7.22 | 590 | TransportDB |
| Bacteria | <i>Helicobacter</i>      | <i>cinaedi</i> ATCCBAA847      | 2.24 | 167 | TransportDB |
| Bacteria | <i>Helicobacter</i>      | <i>cinaedi</i> PAGU611         | 2.1  | 166 | TransportDB |
| Bacteria | <i>Hyphomicrobium</i>    | <i>denitrificans</i> 1NES1     | 3.81 | 270 | TransportDB |
| Bacteria | <i>Hyphomicrobium</i>    | <i>denitrificans</i> ATCC51888 | 3.64 | 247 | TransportDB |
| Bacteria | <i>Haemophilus</i>       | <i>ducreyi</i> 35000HP         | 1.7  | 168 | TransportDB |
| Bacteria | <i>Halomonas</i>         | <i>elongata</i> DSM2581        | 4.06 | 582 | TransportDB |
| Bacteria | <i>Helicobacter</i>      | <i>felis</i> ATCC49179         | 1.67 | 120 | TransportDB |
| Bacteria | <i>Halobacteroides</i>   | <i>halobius</i> DSM5150        | 2.65 | 292 | TransportDB |
| Bacteria | <i>Halorhodospira</i>    | <i>halophila</i> SL1           | 2.68 | 224 | TransportDB |
| Bacteria | <i>Halobacillus</i>      | <i>halophilus</i> DSM2266      | 4.17 | 471 | TransportDB |
| Bacteria | <i>Halyomorpha</i>       | <i>halys</i> carbekii          | 1.15 | 74  | TransportDB |
| Bacteria | <i>Helicobacter</i>      | <i>heilmannii</i> ASB14        | 1.8  | 127 | TransportDB |
| Bacteria | <i>Helicobacter</i>      | <i>hepaticus</i> ATCC51449     | 1.8  | 150 | TransportDB |
| Bacteria | <i>Halanaerobium</i>     | <i>hydrogeniformans</i>        | 2.61 | 299 | TransportDB |
| Bacteria | <i>Haliscomenobacter</i> | <i>hydrossis</i> DSM1100       | 8.77 | 346 | TransportDB |
| Bacteria | <i>Haemophilus</i>       | <i>influenzae</i> 10810        | 1.98 | 218 | TransportDB |
| Bacteria | <i>Haemophilus</i>       | <i>influenzae</i> 86028NP      | 1.91 | 201 | TransportDB |
| Bacteria | <i>Haemophilus</i>       | <i>influenzae</i> F3031        | 1.99 | 195 | TransportDB |
| Bacteria | <i>Haemophilus</i>       | <i>influenzae</i> F3047        | 2.01 | 194 | TransportDB |
| Bacteria | <i>Haemophilus</i>       | <i>influenzae</i> KR494        | 1.86 | 217 | TransportDB |
| Bacteria | <i>Haemophilus</i>       | <i>influenzae</i> PittEE       | 1.81 | 191 | TransportDB |
| Bacteria | <i>Haemophilus</i>       | <i>influenzae</i> PittGG       | 1.89 | 191 | TransportDB |
| Bacteria | <i>Haemophilus</i>       | <i>influenzae</i> R2846        | 1.82 | 209 | TransportDB |
| Bacteria | <i>Haemophilus</i>       | <i>influenzae</i> R2866        | 1.93 | 211 | TransportDB |
| Bacteria | <i>Haemophilus</i>       | <i>influenzae</i> RdKW20       | 1.83 | 216 | TransportDB |
| Bacteria | <i>Hippea</i>            | <i>maritima</i> DSM10411       | 1.69 | 186 | TransportDB |
| Bacteria | <i>Hellobacterium</i>    | <i>modesticaldum</i> Ice1      | 3.08 | 217 | TransportDB |
| Bacteria | <i>Helicobacter</i>      | <i>mustelae</i> 12198          | 1.58 | 132 | TransportDB |
| Bacteria | <i>Halothiobacillus</i>  | <i>neapolitanus</i> c2         | 2.58 | 214 | TransportDB |
| Bacteria | <i>Hyphomonas</i>        | <i>neptunium</i> ATCC15444     | 3.71 | 252 | TransportDB |
| Bacteria | <i>Hyphomicrobium</i>    | <i>nitrativorans</i> NL23      | 3.65 | 261 | TransportDB |
| Bacteria | <i>Haliangium</i>        | <i>ochraceum</i> DSM14365      | 9.45 | 335 | TransportDB |
| Bacteria | <i>Halothermothrix</i>   | <i>oreni</i> H168              | 2.58 | 325 | TransportDB |
| Bacteria | <i>Haemophilus</i>       | <i>parainfluenzae</i> T3T1     | 2.09 | 282 | TransportDB |
| Bacteria | <i>Haemophilus</i>       | <i>parasuis</i> SH0165         | 2.27 | 217 | TransportDB |
| Bacteria | <i>Haemophilus</i>       | <i>parasuis</i> ZJ0906         | 2.32 | 220 | TransportDB |
| Bacteria | <i>Halanaerobium</i>     | <i>praevalens</i> DSM2228      | 2.31 | 304 | TransportDB |
| Bacteria | <i>Helicobacter</i>      | <i>pylori</i> 2017             | 1.55 | 140 | TransportDB |
| Bacteria | <i>Helicobacter</i>      | <i>pylori</i> 2018             | 1.56 | 137 | TransportDB |
| Bacteria | <i>Helicobacter</i>      | <i>pylori</i> 26695            | 1.67 | 144 | TransportDB |
| Bacteria | <i>Helicobacter</i>      | <i>pylori</i> 35A              | 1.57 | 139 | TransportDB |
| Bacteria | <i>Helicobacter</i>      | <i>pylori</i> 51               | 1.59 | 142 | TransportDB |

|          |                       |                               |      |     |             |
|----------|-----------------------|-------------------------------|------|-----|-------------|
| Bacteria | <i>Helicobacter</i>   | <i>pylori</i> 52              | 1.57 | 142 | TransportDB |
| Bacteria | <i>Helicobacter</i>   | <i>pylori</i> 83              | 1.62 | 144 | TransportDB |
| Bacteria | <i>Helicobacter</i>   | <i>pylori</i> 908             | 1.55 | 140 | TransportDB |
| Bacteria | <i>Helicobacter</i>   | <i>pylori</i> Aklavik117      | 1.64 | 134 | TransportDB |
| Bacteria | <i>Helicobacter</i>   | <i>pylori</i> Aklavik86       | 1.51 | 127 | TransportDB |
| Bacteria | <i>Helicobacter</i>   | <i>pylori</i> B38             | 1.58 | 127 | TransportDB |
| Bacteria | <i>Helicobacter</i>   | <i>pylori</i> B8              | 1.68 | 143 | TransportDB |
| Bacteria | <i>Helicobacter</i>   | <i>pylori</i> BM012A          | 1.66 | 142 | TransportDB |
| Bacteria | <i>Helicobacter</i>   | <i>pylori</i> BM012S          | 1.66 | 142 | TransportDB |
| Bacteria | <i>Helicobacter</i>   | <i>pylori</i> Cuz20           | 1.64 | 138 | TransportDB |
| Bacteria | <i>Helicobacter</i>   | <i>pylori</i> ELS37           | 1.67 | 140 | TransportDB |
| Bacteria | <i>Helicobacter</i>   | <i>pylori</i> F16             | 1.58 | 145 | TransportDB |
| Bacteria | <i>Helicobacter</i>   | <i>pylori</i> F30             | 1.58 | 145 | TransportDB |
| Bacteria | <i>Helicobacter</i>   | <i>pylori</i> F32             | 1.58 | 143 | TransportDB |
| Bacteria | <i>Helicobacter</i>   | <i>pylori</i> F57             | 1.61 | 148 | TransportDB |
| Bacteria | <i>Helicobacter</i>   | <i>pylori</i> G27             | 1.66 | 138 | TransportDB |
| Bacteria | <i>Helicobacter</i>   | <i>pylori</i> Gambia9424      | 1.71 | 145 | TransportDB |
| Bacteria | <i>Helicobacter</i>   | <i>pylori</i> HPAG1           | 1.61 | 146 | TransportDB |
| Bacteria | <i>Helicobacter</i>   | <i>pylori</i> HUPB14          | 1.61 | 141 | TransportDB |
| Bacteria | <i>Helicobacter</i>   | <i>pylori</i> India7          | 1.68 | 139 | TransportDB |
| Bacteria | <i>Helicobacter</i>   | <i>pylori</i> J99             | 1.64 | 145 | TransportDB |
| Bacteria | <i>Helicobacter</i>   | <i>pylori</i> Lithuania75     | 1.64 | 140 | TransportDB |
| Bacteria | <i>Helicobacter</i>   | <i>pylori</i> OK113           | 1.62 | 144 | TransportDB |
| Bacteria | <i>Helicobacter</i>   | <i>pylori</i> OK310           | 1.6  | 144 | TransportDB |
| Bacteria | <i>Helicobacter</i>   | <i>pylori</i> P12             | 1.68 | 147 | TransportDB |
| Bacteria | <i>Helicobacter</i>   | <i>pylori</i> PeCan18         | 1.66 | 144 | TransportDB |
| Bacteria | <i>Helicobacter</i>   | <i>pylori</i> PeCan4          | 1.64 | 140 | TransportDB |
| Bacteria | <i>Helicobacter</i>   | <i>pylori</i> Puno120         | 1.64 | 137 | TransportDB |
| Bacteria | <i>Helicobacter</i>   | <i>pylori</i> Puno135         | 1.65 | 141 | TransportDB |
| Bacteria | <i>Helicobacter</i>   | <i>pylori</i> Rif1            | 1.67 | 145 | TransportDB |
| Bacteria | <i>Helicobacter</i>   | <i>pylori</i> Rif2            | 1.67 | 145 | TransportDB |
| Bacteria | <i>Helicobacter</i>   | <i>pylori</i> Sat464          | 1.57 | 136 | TransportDB |
| Bacteria | <i>Helicobacter</i>   | <i>pylori</i> Shi112          | 1.66 | 144 | TransportDB |
| Bacteria | <i>Helicobacter</i>   | <i>pylori</i> Shi169          | 1.62 | 138 | TransportDB |
| Bacteria | <i>Helicobacter</i>   | <i>pylori</i> Shi417          | 1.67 | 143 | TransportDB |
| Bacteria | <i>Helicobacter</i>   | <i>pylori</i> Shi470          | 1.61 | 137 | TransportDB |
| Bacteria | <i>Helicobacter</i>   | <i>pylori</i> SJM180          | 1.66 | 142 | TransportDB |
| Bacteria | <i>Helicobacter</i>   | <i>pylori</i> SNT49           | 1.61 | 138 | TransportDB |
| Bacteria | <i>Helicobacter</i>   | <i>pylori</i> South Africa 20 | 1.62 | 137 | TransportDB |
| Bacteria | <i>Helicobacter</i>   | <i>pylori</i> South Africa 7  | 1.68 | 132 | TransportDB |
| Bacteria | <i>Helicobacter</i>   | <i>pylori</i> UM032           | 1.6  | 146 | TransportDB |
| Bacteria | <i>Helicobacter</i>   | <i>pylori</i> UM037           | 1.69 | 146 | TransportDB |
| Bacteria | <i>Helicobacter</i>   | <i>pylori</i> UM066           | 1.66 | 147 | TransportDB |
| Bacteria | <i>Helicobacter</i>   | <i>pylori</i> UM298           | 1.6  | 138 | TransportDB |
| Bacteria | <i>Helicobacter</i>   | <i>pylori</i> UM299           | 1.6  | 146 | TransportDB |
| Bacteria | <i>Helicobacter</i>   | <i>pylori</i> v225d           | 1.6  | 140 | TransportDB |
| Bacteria | <i>Helicobacter</i>   | <i>pylori</i> XZ274           | 1.66 | 110 | TransportDB |
| Bacteria | <i>Herbaspirillum</i> | <i>seropedicae</i> SmR1       | 5.51 | 689 | TransportDB |

|          |                           |                                                        |      |     |             |
|----------|---------------------------|--------------------------------------------------------|------|-----|-------------|
| Bacteria | <i>Haemophilus</i>        | <i>somnus</i> 129PT                                    | 2.01 | 228 | TransportDB |
| Bacteria | <i>Haemophilus</i>        | <i>somnus</i> 2336                                     | 2.26 | 254 | TransportDB |
| Bacteria | <i>Hydrogenobaculum</i>   | <i>sHO</i>                                             | 1.55 | 107 | TransportDB |
| Bacteria | <i>Hyphomicrobium</i>     | <i>sMC1</i>                                            | 4.76 | 439 | TransportDB |
| Bacteria | <i>Halothece</i>          | <i>sPCC7418</i>                                        | 4.18 | 320 | TransportDB |
| Bacteria | <i>Hydrogenobaculum</i>   | <i>sSN</i>                                             | 1.55 | 108 | TransportDB |
| Bacteria | <i>Hydrogenobaculum</i>   | <i>sY04AAS1</i>                                        | 1.56 | 111 | TransportDB |
| Bacteria | <i>Hydrogenobacter</i>    | <i>thermophilus</i> TK6                                | 1.74 | 129 | TransportDB |
| Bacteria | <i>Ignavibacterium</i>    | <i>album</i> JCM16511                                  | 3.66 | 202 | TransportDB |
| Bacteria | <i>Intrasporangium</i>    | <i>calvum</i> DSM43043                                 | 4.02 | 375 | TransportDB |
| Bacteria | <i>Illumatobacter</i>     | <i>coccineum</i> YM16304                               | 4.83 | 366 | TransportDB |
| Bacteria | <i>Idiomarina</i>         | <i>loihiensis</i> GSL199                               | 2.84 | 237 | TransportDB |
| Bacteria | <i>Idiomarina</i>         | <i>loihiensis</i> L2TR                                 | 2.84 | 236 | TransportDB |
| Bacteria | <i>Isosphaera</i>         | <i>pallida</i> ATCC43644                               | 5.53 | 214 | TransportDB |
| Bacteria | <i>Ilyobacter</i>         | <i>polytropus</i> DSM2926                              | 3.13 | 337 | TransportDB |
| Bacteria | <i>Isoptericola</i>       | <i>variabilis</i> 225                                  | 3.31 | 360 | TransportDB |
| Bacteria | <i>Jonesia</i>            | <i>denitrificans</i> DSM20603                          | 2.75 | 331 | TransportDB |
| Bacteria | <i>Jannaschia</i>         | <i>sCCS1</i>                                           | 4.4  | 555 | TransportDB |
| Bacteria | <i>Janthinobacterium</i>  | <i>sMarseille</i>                                      | 4.11 | 422 | TransportDB |
| Bacteria | <i>Kribbella</i>          | <i>flavida</i> DSM17836                                | 7.58 | 773 | TransportDB |
| Bacteria | <i>Kangiella</i>          | <i>koreensis</i> DSM16069                              | 2.85 | 190 | TransportDB |
| Bacteria | <i>Kosmotoga</i>          | <i>olearia</i> TBF1951                                 | 2.3  | 293 | TransportDB |
| Bacteria | <i>Klebsiella</i>         | <i>oxytoca</i> E718                                    | 6.56 | 997 | TransportDB |
| Bacteria | <i>Klebsiella</i>         | <i>oxytoca</i> KCTC1686                                | 5.97 | 977 | TransportDB |
| Bacteria | <i>Klebsiella</i>         | <i>pneumoniae</i>                                      | 5.38 | 869 | TransportDB |
| Bacteria | <i>Klebsiella</i>         | <i>pneumoniae</i> 342                                  | 5.92 | 933 | TransportDB |
| Bacteria | <i>Klebsiella</i>         | <i>pneumoniae</i> CG43                                 | 5.17 | 844 | TransportDB |
| Bacteria | <i>Klebsiella</i>         | <i>pneumoniae</i> JM45                                 | 5.6  | 835 | TransportDB |
| Bacteria | <i>Klebsiella</i>         | <i>pneumoniae</i> KCTC2242                             | 5.46 | 893 | TransportDB |
| Bacteria | <i>Klebsiella</i>         | <i>pneumoniae</i> subsp<br><i>pneumoniae</i> 1084      | 5.39 | 870 | TransportDB |
| Bacteria | <i>Klebsiella</i>         | <i>pneumoniae</i> subsp<br><i>pneumoniae</i> HS11286   | 5.68 | 881 | TransportDB |
| Bacteria | <i>Klebsiella</i>         | <i>pneumoniae</i> subsp<br><i>pneumoniae</i> MGH78578  | 5.69 | 884 | TransportDB |
| Bacteria | <i>Klebsiella</i>         | <i>pneumoniae</i> subsp<br><i>pneumoniae</i> NTUHK2044 | 5.47 | 893 | TransportDB |
| Bacteria | <i>Kineococcus</i>        | <i>radiotolerans</i> SRS30216                          | 4.96 | 482 | TransportDB |
| Bacteria | <i>Kocuria</i>            | <i>rhizophila</i> DC2201                               | 2.7  | 262 | TransportDB |
| Bacteria | <i>Kytococcus</i>         | <i>sedentarius</i> DSM20547                            | 2.79 | 299 | TransportDB |
| Bacteria | <i>Kitasatospora</i>      | <i>setae</i> KM6054                                    | 8.78 | 682 | TransportDB |
| Bacteria | <i>Krokinobacter</i>      | <i>s4H375</i>                                          | 3.39 | 201 | TransportDB |
| Bacteria | <i>Kyrpidia</i>           | <i>tusciae</i> DSM2912                                 | 3.38 | 299 | TransportDB |
| Bacteria | <i>Klebsiella</i>         | <i>variicola</i> At22                                  | 5.46 | 917 | TransportDB |
| Bacteria | <i>Korebacter</i>         | <i>versatilis</i> Ellin 345                            | 5.65 | 307 | TransportDB |
| Bacteria | <i>Ketogulonicigenium</i> | <i>vulgare</i> WSH001                                  | 3.28 | 560 | TransportDB |
| Bacteria | <i>Ketogulonicigenium</i> | <i>vulgare</i> Y25                                     | 3.29 | 591 | TransportDB |
| Bacteria | <i>Lactobacillus</i>      | <i>acidophilus</i> 30SC                                | 2.1  | 266 | TransportDB |

|          |                       |                                                        |      |     |             |
|----------|-----------------------|--------------------------------------------------------|------|-----|-------------|
| Bacteria | <i>Lactobacillus</i>  | <i>acidophilus</i> La14                                | 1.99 | 281 | TransportDB |
| Bacteria | <i>Lactobacillus</i>  | <i>acidophilus</i> NCFM                                | 1.99 | 281 | TransportDB |
| Bacteria | <i>Lactobacillus</i>  | <i>amylovorus</i> GRL1112                              | 2.13 | 257 | TransportDB |
| Bacteria | <i>Lactobacillus</i>  | <i>amylovorus</i> GRL1118                              | 1.98 | 253 | TransportDB |
| Bacteria | <i>Listonella</i>     | <i>anguillarum</i> M3                                  | 4.12 | 442 | TransportDB |
| Bacteria | <i>Leptospira</i>     | <i>biflexa</i> serovar Patocstrain<br>Patoc1 Ames      | 3.96 | 230 | TransportDB |
| Bacteria | <i>Leptospira</i>     | <i>biflexa</i> serovar Patocstrain<br>Patoc1 Paris     | 3.95 | 231 | TransportDB |
| Bacteria | <i>Leptospira</i>     | <i>borgpetersenii</i> serovar<br>Hardjobovis str JB197 | 3.88 | 166 | TransportDB |
| Bacteria | <i>Leptospira</i>     | <i>borgpetersenii</i> serovar<br>Hardjobovis str L550  | 3.93 | 172 | TransportDB |
| Bacteria | <i>Lactobacillus</i>  | <i>brevis</i> ATCC367                                  | 2.34 | 295 | TransportDB |
| Bacteria | <i>Lactobacillus</i>  | <i>brevis</i> KB290                                    | 2.59 | 332 | TransportDB |
| Bacteria | <i>Leptotrichia</i>   | <i>buccalis</i> C1013b                                 | 2.47 | 236 | TransportDB |
| Bacteria | <i>Lactobacillus</i>  | <i>buchneri</i> CD034                                  | 2.56 | 324 | TransportDB |
| Bacteria | <i>Lactobacillus</i>  | <i>buchneri</i> NRRLB30929                             | 2.59 | 310 | TransportDB |
| Bacteria | <i>Leadbetterella</i> | <i>byssophila</i> DSM17132                             | 4.06 | 206 | TransportDB |
| Bacteria | <i>Leuconostoc</i>    | <i>carnosum</i> JB16                                   | 1.77 | 257 | TransportDB |
| Bacteria | <i>Lactobacillus</i>  | <i>casei</i> ATCC334                                   | 2.92 | 387 | TransportDB |
| Bacteria | <i>Lactobacillus</i>  | <i>casei</i> BDII                                      | 3.13 | 475 | TransportDB |
| Bacteria | <i>Lactobacillus</i>  | <i>casei</i> BL23                                      | 3.08 | 479 | TransportDB |
| Bacteria | <i>Lactobacillus</i>  | <i>casei</i> LC2W                                      | 3.08 | 475 | TransportDB |
| Bacteria | <i>Lactobacillus</i>  | <i>casei</i> LOCK919                                   | 3.14 | 474 | TransportDB |
| Bacteria | <i>Lactobacillus</i>  | <i>casei</i> str Zhang                                 | 2.9  | 437 | TransportDB |
| Bacteria | <i>Lactobacillus</i>  | <i>casei</i> W56                                       | 3.13 | 471 | TransportDB |
| Bacteria | <i>Leptothrix</i>     | <i>cholodnii</i> SP6                                   | 4.91 | 502 | TransportDB |
| Bacteria | <i>Leuconostoc</i>    | <i>citreum</i> KM20                                    | 1.9  | 260 | TransportDB |
| Bacteria | <i>Lactobacillus</i>  | <i>crispatus</i> ST1                                   | 2.04 | 294 | TransportDB |
| Bacteria | <i>Lactobacillus</i>  | <i>delbrueckii</i> subsp bulgaricus<br>2038            | 1.87 | 261 | TransportDB |
| Bacteria | <i>Lactobacillus</i>  | <i>delbrueckii</i> subsp bulgaricus<br>ATCC11842       | 1.87 | 202 | TransportDB |
| Bacteria | <i>Lactobacillus</i>  | <i>delbrueckii</i> subsp bulgaricus<br>ATCCBAA365      | 1.86 | 198 | TransportDB |
| Bacteria | <i>Lactobacillus</i>  | <i>delbrueckii</i> subsp bulgaricus<br>ND02            | 2.13 | 245 | TransportDB |
| Bacteria | <i>Lactobacillus</i>  | <i>fermentum</i> CECT5716                              | 2.1  | 172 | TransportDB |
| Bacteria | <i>Lactobacillus</i>  | <i>fermentum</i> F6                                    | 2.06 | 231 | TransportDB |
| Bacteria | <i>Lactobacillus</i>  | <i>fermentum</i> IFO3956                               | 2.1  | 222 | TransportDB |
| Bacteria | <i>Leptospirillum</i> | <i>ferriphilum</i> ML04                                | 2.41 | 159 | TransportDB |
| Bacteria | <i>Leptospirillum</i> | <i>ferrooxidans</i> C23                                | 2.56 | 159 | TransportDB |
| Bacteria | <i>Lactococcus</i>    | <i>garvieae</i> ATCC49156                              | 1.95 | 248 | TransportDB |
| Bacteria | <i>Lactococcus</i>    | <i>garvieae</i> Lg2                                    | 1.96 | 245 | TransportDB |
| Bacteria | <i>Leuconostoc</i>    | <i>gasicomitatum</i> LMG18811                          | 1.95 | 287 | TransportDB |
| Bacteria | <i>Lactobacillus</i>  | <i>gasseri</i> ATCC33323                               | 1.89 | 254 | TransportDB |
| Bacteria | <i>Leuconostoc</i>    | <i>gelidum</i> JB7                                     | 1.89 | 274 | TransportDB |
| Bacteria | <i>Lactobacillus</i>  | <i>helveticus</i> CNRZ32                               | 2.23 | 227 | TransportDB |

|          |                      |                                                                |      |     |             |
|----------|----------------------|----------------------------------------------------------------|------|-----|-------------|
| Bacteria | <i>Lactobacillus</i> | <i>helveticus</i> DPC4571                                      | 2.08 | 214 | TransportDB |
| Bacteria | <i>Lactobacillus</i> | <i>helveticus</i> H10                                          | 2.17 | 256 | TransportDB |
| Bacteria | <i>Lactobacillus</i> | <i>helveticus</i> R0052                                        | 2.13 | 245 | TransportDB |
| Bacteria | <i>Laribacter</i>    | <i>hongkongensis</i> HLHK9                                     | 3.17 | 331 | TransportDB |
| Bacteria | <i>Listeria</i>      | <i>innocua</i> Clip11262                                       | 3.09 | 439 | TransportDB |
| Bacteria | <i>Leptospira</i>    | <i>interrogans</i> serovar<br>Copenhageni str Fiocruz<br>L1130 | 4.63 | 189 | TransportDB |
| Bacteria | <i>Leptospira</i>    | <i>interrogans</i> serovar Lai str<br>56601                    | 4.7  | 199 | TransportDB |
| Bacteria | <i>Leptospira</i>    | <i>interrogans</i> serovar Lai str<br>IPAV                     | 4.71 | 198 | TransportDB |
| Bacteria | <i>Lawsonia</i>      | <i>intracellularis</i> N343                                    | 1.72 | 154 | TransportDB |
| Bacteria | <i>Lawsonia</i>      | <i>intracellularis</i> PHEMN100                                | 1.72 | 154 | TransportDB |
| Bacteria | <i>Listeria</i>      | <i>ivanovii</i> subsp <i>ivanovii</i> PAM55                    | 2.93 | 423 | TransportDB |
| Bacteria | <i>Lactobacillus</i> | <i>johnsonii</i> DPC6026                                       | 1.97 | 287 | TransportDB |
| Bacteria | <i>Lactobacillus</i> | <i>johnsonii</i> FI9785                                        | 1.79 | 272 | TransportDB |
| Bacteria | <i>Lactobacillus</i> | <i>johnsonii</i> N62                                           | 1.89 | 273 | TransportDB |
| Bacteria | <i>Lactobacillus</i> | <i>johnsonii</i> NCC533                                        | 1.99 | 306 | TransportDB |
| Bacteria | <i>Lactobacillus</i> | <i>kefiranofaciens</i> ZW3                                     | 2.35 | 243 | TransportDB |
| Bacteria | <i>Leuconostoc</i>   | <i>kimchii</i> IMSNU11154                                      | 2.1  | 300 | TransportDB |
| Bacteria | <i>Lactococcus</i>   | <i>lactis</i> subsp <i>cremoris</i> A76                        | 2.58 | 317 | TransportDB |
| Bacteria | <i>Lactococcus</i>   | <i>lactis</i> subsp <i>cremoris</i> KW2                        | 2.43 | 308 | TransportDB |
| Bacteria | <i>Lactococcus</i>   | <i>lactis</i> subsp <i>cremoris</i> MG1363                     | 2.53 | 285 | TransportDB |
| Bacteria | <i>Lactococcus</i>   | <i>lactis</i> subsp <i>cremoris</i> NZ9000                     | 2.53 | 286 | TransportDB |
| Bacteria | <i>Lactococcus</i>   | <i>lactis</i> subsp <i>cremoris</i> SK11                       | 2.6  | 272 | TransportDB |
| Bacteria | <i>Lactococcus</i>   | <i>lactis</i> subsp <i>cremoris</i> UC5099                     | 2.46 | 264 | TransportDB |
| Bacteria | <i>Lactococcus</i>   | <i>lactis</i> subsp <i>lactis</i> CV56                         | 2.52 | 284 | TransportDB |
| Bacteria | <i>Lactococcus</i>   | <i>lactis</i> subsp <i>lactis</i> II1403                       | 2.37 | 268 | TransportDB |
| Bacteria | <i>Lactococcus</i>   | <i>lactis</i> subsp <i>lactis</i> IO1                          | 2.42 | 298 | TransportDB |
| Bacteria | <i>Lactococcus</i>   | <i>lactis</i> subsp <i>lactis</i> KF147                        | 2.64 | 330 | TransportDB |
| Bacteria | <i>Lactococcus</i>   | <i>lactis</i> subsp <i>lactis</i> KLDS40325                    | 2.59 | 283 | TransportDB |
| Bacteria | <i>Legionella</i>    | <i>longbeachae</i> NSW150                                      | 4.15 | 313 | TransportDB |
| Bacteria | <i>Leuconostoc</i>   | <i>mesenteroides</i> subsp<br><i>mesenteroides</i> ATCC8293    | 2.08 | 298 | TransportDB |
| Bacteria | <i>Leuconostoc</i>   | <i>mesenteroides</i> subsp<br><i>mesenteroides</i> J18         | 2.02 | 286 | TransportDB |
| Bacteria | <i>Leisingera</i>    | <i>methylohalidivorans</i><br>DSM14336                         | 4.65 | 471 | TransportDB |
| Bacteria | <i>Listeria</i>      | <i>monocytogenes</i>                                           | 2.78 | 485 | TransportDB |
| Bacteria | <i>Listeria</i>      | <i>monocytogenes</i> 07PF0776                                  | 2.9  | 429 | TransportDB |
| Bacteria | <i>Listeria</i>      | <i>monocytogenes</i> 085578                                    | 3.11 | 447 | TransportDB |
| Bacteria | <i>Listeria</i>      | <i>monocytogenes</i> 085923                                    | 3.0  | 439 | TransportDB |
| Bacteria | <i>Listeria</i>      | <i>monocytogenes</i> 10403S                                    | 2.9  | 436 | TransportDB |
| Bacteria | <i>Listeria</i>      | <i>monocytogenes</i> ATCC19117                                 | 2.95 | 440 | TransportDB |
| Bacteria | <i>Listeria</i>      | <i>monocytogenes</i> EGD                                       | 2.91 | 436 | TransportDB |

|          |                      |                                                             |      |     |             |
|----------|----------------------|-------------------------------------------------------------|------|-----|-------------|
| Bacteria | <i>Listeria</i>      | <i>monocytogenes</i> EGDe                                   | 2.94 | 434 | TransportDB |
| Bacteria | <i>Listeria</i>      | <i>monocytogenes</i> Finland1998                            | 2.87 | 436 | TransportDB |
| Bacteria | <i>Listeria</i>      | <i>monocytogenes</i> FSLR2561                               | 2.97 | 437 | TransportDB |
| Bacteria | <i>Listeria</i>      | <i>monocytogenes</i> HCC23                                  | 2.98 | 421 | TransportDB |
| Bacteria | <i>Listeria</i>      | <i>monocytogenes</i> J0161                                  | 3.0  | 441 | TransportDB |
| Bacteria | <i>Listeria</i>      | <i>monocytogenes</i> J1220                                  | 3.03 | 433 | TransportDB |
| Bacteria | <i>Listeria</i>      | <i>monocytogenes</i> J1816                                  | 2.95 | 279 | TransportDB |
| Bacteria | <i>Listeria</i>      | <i>monocytogenes</i> L312                                   | 2.91 | 440 | TransportDB |
| Bacteria | <i>Listeria</i>      | <i>monocytogenes</i> L99                                    | 2.98 | 421 | TransportDB |
| Bacteria | <i>Listeria</i>      | <i>monocytogenes</i> M7                                     | 2.98 | 422 | TransportDB |
| Bacteria | <i>Listeria</i>      | <i>monocytogenes</i> N531                                   | 2.78 | 487 | TransportDB |
| Bacteria | <i>Listeria</i>      | <i>monocytogenes</i> serotype 4b<br>str CLIP80459           | 2.91 | 439 | TransportDB |
| Bacteria | <i>Listeria</i>      | <i>monocytogenes</i> serotype 4b<br>str F2365               | 2.91 | 422 | TransportDB |
| Bacteria | <i>Listeria</i>      | <i>monocytogenes</i> serotype 4b<br>str LL195               | 2.9  | 431 | TransportDB |
| Bacteria | <i>Listeria</i>      | <i>monocytogenes</i> serotype 7 str<br>SLCC2482             | 2.99 | 439 | TransportDB |
| Bacteria | <i>Listeria</i>      | <i>monocytogenes</i> SLCC2372                               | 3.02 | 440 | TransportDB |
| Bacteria | <i>Listeria</i>      | <i>monocytogenes</i> SLCC2376                               | 2.84 | 431 | TransportDB |
| Bacteria | <i>Listeria</i>      | <i>monocytogenes</i> SLCC2378                               | 2.94 | 443 | TransportDB |
| Bacteria | <i>Listeria</i>      | <i>monocytogenes</i> SLCC2479                               | 2.97 | 438 | TransportDB |
| Bacteria | <i>Listeria</i>      | <i>monocytogenes</i> SLCC2540                               | 2.98 | 438 | TransportDB |
| Bacteria | <i>Listeria</i>      | <i>monocytogenes</i> SLCC2755                               | 3.02 | 441 | TransportDB |
| Bacteria | <i>Listeria</i>      | <i>monocytogenes</i> SLCC5850                               | 2.91 | 436 | TransportDB |
| Bacteria | <i>Listeria</i>      | <i>monocytogenes</i> SLCC7179                               | 2.88 | 434 | TransportDB |
| Bacteria | <i>Lactobacillus</i> | <i>paracasei</i> subsp<br><i>paracasei</i> 8700             | 3.03 | 451 | TransportDB |
| Bacteria | <i>Lactobacillus</i> | <i>plantarum</i> 16                                         | 3.36 | 427 | TransportDB |
| Bacteria | <i>Lactobacillus</i> | <i>plantarum</i> JDM1                                       | 3.2  | 446 | TransportDB |
| Bacteria | <i>Lactobacillus</i> | <i>plantarum</i> subsp <i>plantarum</i> P8                  | 3.23 | 418 | TransportDB |
| Bacteria | <i>Lactobacillus</i> | <i>plantarum</i> subsp <i>plantarum</i><br>STIII            | 3.31 | 441 | TransportDB |
| Bacteria | <i>Lactobacillus</i> | <i>plantarum</i> WCFS1                                      | 3.35 | 453 | TransportDB |
| Bacteria | <i>Lactobacillus</i> | <i>plantarum</i> ZJ316                                      | 3.2  | 438 | TransportDB |
| Bacteria | <i>Legionella</i>    | <i>pneumophila</i> 230099 Alcoy                             | 3.52 | 290 | TransportDB |
| Bacteria | <i>Legionella</i>    | <i>pneumophila</i> str Corby                                | 3.58 | 294 | TransportDB |
| Bacteria | <i>Legionella</i>    | <i>pneumophila</i> str Lens                                 | 3.41 | 271 | TransportDB |
| Bacteria | <i>Legionella</i>    | <i>pneumophila</i> str Paris                                | 3.64 | 290 | TransportDB |
| Bacteria | <i>Legionella</i>    | <i>pneumophila</i> subsp<br><i>pneumophila</i>              | 3.49 | 292 | TransportDB |
| Bacteria | <i>Legionella</i>    | <i>pneumophila</i> subsp<br><i>pneumophila</i> ATCC43290    | 3.36 | 275 | TransportDB |
| Bacteria | <i>Legionella</i>    | <i>pneumophila</i> subsp<br><i>pneumophila</i> LPE509       | 3.51 | 304 | TransportDB |
| Bacteria | <i>Legionella</i>    | <i>pneumophila</i> subsp<br><i>pneumophila</i> str Lorraine | 3.62 | 293 | TransportDB |

|          |                         |                                                                  |      |     |             |
|----------|-------------------------|------------------------------------------------------------------|------|-----|-------------|
| Bacteria | <i>Legionella</i>       | <i>pneumophila</i> subsp<br><i>pneumophila</i> str Philadelphia1 | 3.4  | 288 | TransportDB |
| Bacteria | <i>Legionella</i>       | <i>pneumophila</i> subsp<br><i>pneumophila</i> str Thunder Bay   | 3.46 | 295 | TransportDB |
| Bacteria | <i>Lactobacillus</i>    | <i>reuteri</i> DSM20016                                          | 2.0  | 223 | TransportDB |
| Bacteria | <i>Lactobacillus</i>    | <i>reuteri</i> I5007                                             | 2.09 | 223 | TransportDB |
| Bacteria | <i>Lactobacillus</i>    | <i>reuteri</i> JCM1112                                           | 2.04 | 223 | TransportDB |
| Bacteria | <i>Lactobacillus</i>    | <i>reuteri</i> SD2112                                            | 2.32 | 233 | TransportDB |
| Bacteria | <i>Lactobacillus</i>    | <i>reuteri</i> TD1                                               | 2.15 | 217 | TransportDB |
| Bacteria | <i>Lactobacillus</i>    | <i>rhamnosus</i> ATCC8530                                        | 2.96 | 443 | TransportDB |
| Bacteria | <i>Lactobacillus</i>    | <i>rhamnosus</i> GG                                              | 3.01 | 439 | TransportDB |
| Bacteria | <i>Lactobacillus</i>    | <i>rhamnosus</i> Lc705                                           | 3.03 | 474 | TransportDB |
| Bacteria | <i>Lactobacillus</i>    | <i>rhamnosus</i> LOCK900                                         | 2.88 | 439 | TransportDB |
| Bacteria | <i>Lactobacillus</i>    | <i>rhamnosus</i> LOCK908                                         | 2.99 | 448 | TransportDB |
| Bacteria | <i>Lactobacillus</i>    | <i>ruminis</i> ATCC27782                                         | 2.07 | 238 | TransportDB |
| Bacteria | <i>Lactobacillus</i>    | <i>sakei</i> subsp <i>sakei</i> 23K                              | 1.88 | 265 | TransportDB |
| Bacteria | <i>Lactobacillus</i>    | <i>salivarius</i> CECT5713                                       | 2.14 | 238 | TransportDB |
| Bacteria | <i>Lactobacillus</i>    | <i>salivarius</i> UCC118                                         | 2.13 | 241 | TransportDB |
| Bacteria | <i>Lactobacillus</i>    | <i>sanfranciscensis</i> TMW11304                                 | 1.38 | 158 | TransportDB |
| Bacteria | <i>Listeria</i>         | <i>seeligeri</i> serovar 12b str<br>SLCC3954                     | 2.8  | 388 | TransportDB |
| Bacteria | <i>Lacinutrix</i>       | <i>s5H374</i>                                                    | 3.3  | 189 | TransportDB |
| Bacteria | <i>Leuconostoc</i>      | <i>sC2</i>                                                       | 1.88 | 280 | TransportDB |
| Bacteria | <i>Leptolyngbya</i>     | <i>sPCC7376</i>                                                  | 5.13 | 298 | TransportDB |
| Bacteria | <i>Lysinibacillus</i>   | <i>sphaericus</i> C341                                           | 4.82 | 566 | TransportDB |
| Bacteria | <i>Listeria</i>         | <i>welshimeri</i> serovar 6b str<br>SLCC5334                     | 2.81 | 413 | TransportDB |
| Bacteria | <i>Leifsonia</i>        | <i>xyli</i> subsp <i>cynodontis</i><br>DSM46306                  | 2.69 | 223 | TransportDB |
| Bacteria | <i>Leifsonia</i>        | <i>xyli</i> subsp <i>xyli</i> str CTCB07                         | 2.58 | 199 | TransportDB |
| Bacteria | <i>Mycobacterium</i>    | <i>abscessus</i>                                                 | 5.09 | 388 | TransportDB |
| Bacteria | <i>Mycobacterium</i>    | <i>abscessus</i> ATCC19977                                       | 5.09 | 388 | TransportDB |
| Bacteria | <i>Mycobacterium</i>    | <i>abscessus</i> subsp <i>bolletii</i> 50594                     | 5.27 | 375 | TransportDB |
| Bacteria | <i>Marinobacter</i>     | <i>adhaerens</i> HP15                                            | 4.65 | 484 | TransportDB |
| Bacteria | <i>Microcystis</i>      | <i>aeruginosa</i> NIES843                                        | 5.84 | 291 | TransportDB |
| Bacteria | <i>Micavibrio</i>       | <i>aeruginosavorus</i> ARL13                                     | 2.48 | 143 | TransportDB |
| Bacteria | <i>Micavibrio</i>       | <i>aeruginosavorus</i> EPB                                       | 2.46 | 137 | TransportDB |
| Bacteria | <i>Mycobacterium</i>    | <i>africanum</i> GM041182                                        | 4.39 | 255 | TransportDB |
| Bacteria | <i>Mycoplasma</i>       | <i>agalactiae</i>                                                | 1.01 | 86  | TransportDB |
| Bacteria | <i>Mycoplasma</i>       | <i>agalactiae</i> PG2                                            | 0.88 | 81  | TransportDB |
| Bacteria | <i>Methylomicrobium</i> | <i>alcaliphilum</i> 20Z                                          | 4.67 | 293 | TransportDB |
| Bacteria | <i>Marinobacter</i>     | <i>aquaeolei</i> VT8                                             | 4.78 | 437 | TransportDB |
| Bacteria | <i>Mycoplasma</i>       | <i>arthritidis</i> 158L31                                        | 0.82 | 58  | TransportDB |
| Bacteria | <i>Micromonospora</i>   | <i>aurantiaca</i> ATCC27029                                      | 7.03 | 575 | TransportDB |
| Bacteria | <i>Mesorhizobium</i>    | <i>australicum</i> WSM2073                                       | 6.2  | 877 | TransportDB |
| Bacteria | <i>Mahella</i>          | <i>australiensis</i> 501BON                                      | 3.14 | 396 | TransportDB |
| Bacteria | <i>Mycobacterium</i>    | <i>avium</i> 104                                                 | 5.48 | 297 | TransportDB |

|          |                         |                                                     |      |     |             |
|----------|-------------------------|-----------------------------------------------------|------|-----|-------------|
| Bacteria | <i>Mycobacterium</i>    | <i>avium</i> subsp <i>paratuberculosis</i> K10      | 4.83 | 316 | TransportDB |
| Bacteria | <i>Mycobacterium</i>    | <i>avium</i> subsp <i>paratuberculosis</i> MAP4     | 4.83 | 305 | TransportDB |
| Bacteria | <i>Mycobacterium</i>    | <i>bovis</i> AF212297                               | 4.35 | 264 | TransportDB |
| Bacteria | <i>Mycobacterium</i>    | <i>bovis</i> BCG str Korea1168P                     | 4.38 | 263 | TransportDB |
| Bacteria | <i>Mycobacterium</i>    | <i>bovis</i> BCG str Mexico                         | 4.35 | 260 | TransportDB |
| Bacteria | <i>Mycobacterium</i>    | <i>bovis</i> BCG str Pasteur1173P2                  | 4.37 | 261 | TransportDB |
| Bacteria | <i>Mycobacterium</i>    | <i>bovis</i> BCG str Tokyo172                       | 4.37 | 262 | TransportDB |
| Bacteria | <i>Mycoplasma</i>       | <i>bovis</i> HB0801                                 | 0.99 | 72  | TransportDB |
| Bacteria | <i>Mycoplasma</i>       | <i>bovis</i> Hubei1                                 | 0.95 | 76  | TransportDB |
| Bacteria | <i>Mycoplasma</i>       | <i>bovis</i> PG45                                   | 1.0  | 77  | TransportDB |
| Bacteria | <i>Mycobacterium</i>    | <i>canettii</i> CIPT140010059                       | 4.48 | 265 | TransportDB |
| Bacteria | <i>Mycobacterium</i>    | <i>canettii</i> CIPT140060008                       | 4.43 | 266 | TransportDB |
| Bacteria | <i>Mycobacterium</i>    | <i>canettii</i> CIPT140070008                       | 4.42 | 266 | TransportDB |
| Bacteria | <i>Mycobacterium</i>    | <i>canettii</i> CIPT140070010                       | 4.53 | 270 | TransportDB |
| Bacteria | <i>Mycobacterium</i>    | <i>canettii</i> CIPT140070017                       | 4.52 | 273 | TransportDB |
| Bacteria | <i>Mycoplasma</i>       | <i>capricolum</i> subsp <i>capricolum</i> ATCC27343 | 1.01 | 91  | TransportDB |
| Bacteria | <i>Methylococcus</i>    | <i>capsulatus</i> str Bath                          | 3.3  | 243 | TransportDB |
| Bacteria | <i>Macrococcus</i>      | <i>caseolyticus</i> JCSC5402                        | 2.22 | 257 | TransportDB |
| Bacteria | <i>Moraxella</i>        | <i>cafarrhalis</i> RH4                              | 1.86 | 153 | TransportDB |
| Bacteria | <i>Mycobacterium</i>    | <i>chubuense</i> NBB4                               | 6.34 | 491 | TransportDB |
| Bacteria | <i>Mesorhizobium</i>    | <i>ciceri</i> biovar <i>biserrulae</i> WSM1271      | 6.69 | 973 | TransportDB |
| Bacteria | <i>Mycoplasma</i>       | <i>conjunctivae</i> HRC581                          | 0.85 | 77  | TransportDB |
| Bacteria | <i>Mycoplasma</i>       | <i>crocodyli</i> MP145                              | 0.93 | 88  | TransportDB |
| Bacteria | <i>Mobiluncus</i>       | <i>curtisii</i> ATCC43063                           | 2.15 | 212 | TransportDB |
| Bacteria | <i>Mycoplasma</i>       | <i>cynos</i> C142                                   | 1.0  | 78  | TransportDB |
| Bacteria | <i>Megasphaera</i>      | <i>elsdenii</i> DSM20460                            | 2.47 | 235 | TransportDB |
| Bacteria | <i>Methylobacterium</i> | <i>extorquens</i> AM1                               | 6.88 | 469 | TransportDB |
| Bacteria | <i>Methylobacterium</i> | <i>extorquens</i> DM4                               | 6.12 | 495 | TransportDB |
| Bacteria | <i>Methylobacterium</i> | <i>extorquens</i> PA1                               | 5.47 | 430 | TransportDB |
| Bacteria | <i>Mycoplasma</i>       | <i>fermentans</i> JER                               | 0.98 | 90  | TransportDB |
| Bacteria | <i>Mycoplasma</i>       | <i>fermentans</i> M64                               | 1.12 | 105 | TransportDB |
| Bacteria | <i>Mycoplasma</i>       | <i>fermentans</i> PG18                              | 1.0  | 99  | TransportDB |
| Bacteria | <i>Methylobacillus</i>  | <i>flagellatus</i> KT                               | 2.97 | 273 | TransportDB |
| Bacteria | <i>Mycobacterium</i>    | <i>flavescens</i> ( <i>gilvum</i> ) PYR-GCK         | 5.62 | 464 | TransportDB |
| Bacteria | <i>Mesoplasma</i>       | <i>florum</i> L1                                    | 0.79 | 78  | TransportDB |
| Bacteria | <i>Mesoplasma</i>       | <i>florum</i> W37                                   | 0.83 | 83  | TransportDB |
| Bacteria | <i>Myxococcus</i>       | <i>fulvus</i> HW1                                   | 9.0  | 404 | TransportDB |
| Bacteria | <i>Mycoplasma</i>       | <i>gallisepticum</i> CA06_200605252P                | 0.98 | 83  | TransportDB |
| Bacteria | <i>Mycoplasma</i>       | <i>gallisepticum</i> NC06_200608052P                | 0.94 | 83  | TransportDB |
| Bacteria | <i>Mycoplasma</i>       | <i>gallisepticum</i> NC08_200803143P                | 0.93 | 83  | TransportDB |

|          |                         |                                                          |      |     |             |
|----------|-------------------------|----------------------------------------------------------|------|-----|-------------|
| Bacteria | <i>Mycoplasma</i>       | <i>gallisepticum</i><br>NC95_1329522P                    | 0.95 | 84  | TransportDB |
| Bacteria | <i>Mycoplasma</i>       | <i>gallisepticum</i> NC96_159642P                        | 0.99 | 87  | TransportDB |
| Bacteria | <i>Mycoplasma</i>       | <i>gallisepticum</i><br>NY01_200104751P                  | 0.97 | 84  | TransportDB |
| Bacteria | <i>Mycoplasma</i>       | <i>gallisepticum</i> R                                   | 1.0  | 93  | TransportDB |
| Bacteria | <i>Mycoplasma</i>       | <i>gallisepticum</i> S6                                  | 0.99 | 76  | TransportDB |
| Bacteria | <i>Mycoplasma</i>       | <i>gallisepticum</i> str F                               | 0.98 | 88  | TransportDB |
| Bacteria | <i>Mycoplasma</i>       | <i>gallisepticum</i> str Rhigh                           | 1.01 | 82  | TransportDB |
| Bacteria | <i>Mycoplasma</i>       | <i>gallisepticum</i> str Rlow                            | 1.01 | 82  | TransportDB |
| Bacteria | <i>Mycoplasma</i>       | <i>gallisepticum</i> VA94_799417P                        | 0.96 | 85  | TransportDB |
| Bacteria | <i>Mycoplasma</i>       | <i>gallisepticum</i><br>WI01_2001043132P                 | 0.94 | 82  | TransportDB |
| Bacteria | <i>Mycoplasma</i>       | <i>genitalium</i> G37                                    | 0.58 | 53  | TransportDB |
| Bacteria | <i>Mycoplasma</i>       | <i>genitalium</i> M2288                                  | 0.58 | 52  | TransportDB |
| Bacteria | <i>Mycoplasma</i>       | <i>genitalium</i> M2321                                  | 0.58 | 50  | TransportDB |
| Bacteria | <i>Mycoplasma</i>       | <i>genitalium</i> M6282                                  | 0.58 | 46  | TransportDB |
| Bacteria | <i>Mycoplasma</i>       | <i>genitalium</i> M6320                                  | 0.58 | 51  | TransportDB |
| Bacteria | <i>Mycobacterium</i>    | <i>gilvum</i> PYRGCK                                     | 5.98 | 447 | TransportDB |
| Bacteria | <i>Mycobacterium</i>    | <i>gilvum</i> Spyr1                                      | 5.78 | 422 | TransportDB |
| Bacteria | <i>Methylovorus</i>     | <i>glucosetrophus</i> SIP34                              | 3.08 | 233 | TransportDB |
| Bacteria | <i>Magnetospirillum</i> | <i>gryphiswaldense</i> MSR1v2                            | 4.37 | 366 | TransportDB |
| Bacteria | <i>Mycoplasma</i>       | <i>haemocanis</i> str Illinois                           | 0.92 | 30  | TransportDB |
| Bacteria | <i>Mycoplasma</i>       | <i>haemofelis</i> Ohio2                                  | 1.16 | 29  | TransportDB |
| Bacteria | <i>Mycoplasma</i>       | <i>haemofelis</i> str Langford1                          | 1.15 | 31  | TransportDB |
| Bacteria | <i>Mannheimia</i>       | <i>haemolytica</i> D153                                  | 2.68 | 297 | TransportDB |
| Bacteria | <i>Mannheimia</i>       | <i>haemolytica</i> D171                                  | 2.5  | 297 | TransportDB |
| Bacteria | <i>Mannheimia</i>       | <i>haemolytica</i> D174                                  | 2.7  | 297 | TransportDB |
| Bacteria | <i>Mannheimia</i>       | <i>haemolytica</i> M42548                                | 2.73 | 329 | TransportDB |
| Bacteria | <i>Mannheimia</i>       | <i>haemolytica</i><br>USDAARSUSMARC183                   | 2.66 | 328 | TransportDB |
| Bacteria | <i>Mannheimia</i>       | <i>haemolytica</i><br>USDAARSUSMARC185                   | 2.54 | 331 | TransportDB |
| Bacteria | <i>Mannheimia</i>       | <i>haemolytica</i> USMARC_2286                           | 2.66 | 320 | TransportDB |
| Bacteria | <i>Mycoplasma</i>       | <i>hominis</i> ATCC23114                                 | 0.67 | 51  | TransportDB |
| Bacteria | <i>Marinobacter</i>     | <i>hydrocarbonoclasticus</i><br>( <i>aquaeolei</i> ) VT8 | 4.33 | 433 | TransportDB |
| Bacteria | <i>Marinobacter</i>     | <i>hydrocarbonoclasticus</i><br>ATCC49840                | 3.99 | 411 | TransportDB |
| Bacteria | <i>Marinithermus</i>    | <i>hydrothermalis</i> DSM14884                           | 2.27 | 257 | TransportDB |
| Bacteria | <i>Mycoplasma</i>       | <i>hyopneumoniae</i> 168                                 | 0.93 | 92  | TransportDB |
| Bacteria | <i>Mycoplasma</i>       | <i>hyopneumoniae</i> 168L                                | 0.92 | 92  | TransportDB |
| Bacteria | <i>Mycoplasma</i>       | <i>hyopneumoniae</i> 232                                 | 0.89 | 97  | TransportDB |
| Bacteria | <i>Mycoplasma</i>       | <i>hyopneumoniae</i> 7422                                | 0.9  | 92  | TransportDB |
| Bacteria | <i>Mycoplasma</i>       | <i>hyopneumoniae</i> 7448                                | 0.92 | 92  | TransportDB |
| Bacteria | <i>Mycoplasma</i>       | <i>hyopneumoniae</i> J                                   | 0.9  | 90  | TransportDB |
| Bacteria | <i>Mycoplasma</i>       | <i>hyorhinis</i> DBS1050                                 | 0.84 | 80  | TransportDB |

|          |                          |                                                         |      |     |             |
|----------|--------------------------|---------------------------------------------------------|------|-----|-------------|
| Bacteria | <i>Mycoplasma</i>        | <i>hyorhinis</i> GDL1                                   | 0.84 | 76  | TransportDB |
| Bacteria | <i>Mycoplasma</i>        | <i>hyorhinis</i> HUB1                                   | 0.84 | 71  | TransportDB |
| Bacteria | <i>Mycoplasma</i>        | <i>hyorhinis</i> MCLD                                   | 0.83 | 77  | TransportDB |
| Bacteria | <i>Mycoplasma</i>        | <i>hyorhinis</i> SK76                                   | 0.84 | 84  | TransportDB |
| Bacteria | <i>Megamonas</i>         | <i>hypermegale</i> ART121                               | 2.21 | 290 | TransportDB |
| Bacteria | <i>Mycobacterium</i>     | <i>indicus</i> praniiMTCC9506                           | 5.59 | 322 | TransportDB |
| Bacteria | <i>Methylacidiphilum</i> | <i>inferorum</i> V4                                     | 2.29 | 120 | TransportDB |
| Bacteria | <i>Mycobacterium</i>     | <i>intracellulare</i> ATCC13950                         | 5.4  | 308 | TransportDB |
| Bacteria | <i>Mycobacterium</i>     | <i>intracellulare</i> MOTT02                            | 5.41 | 304 | TransportDB |
| Bacteria | <i>Mycobacterium</i>     | <i>intracellulare</i> MOTT64                            | 5.5  | 317 | TransportDB |
| Bacteria | <i>Mycobacterium</i>     | <i>kansasii</i> ATCC12478                               | 6.58 | 347 | TransportDB |
| Bacteria | <i>Mycoplasma</i>        | <i>leachii</i> 990146                                   | 1.02 | 104 | TransportDB |
| Bacteria | <i>Mycoplasma</i>        | <i>leachii</i> PG50                                     | 1.01 | 104 | TransportDB |
| Bacteria | <i>Mycobacterium</i>     | <i>leprae</i> Br4923                                    | 3.27 | 116 | TransportDB |
| Bacteria | <i>Mycobacterium</i>     | <i>leprae</i> TN                                        | 3.27 | 114 | TransportDB |
| Bacteria | <i>Mycobacterium</i>     | <i>liflandii</i> 128FXT                                 | 6.4  | 314 | TransportDB |
| Bacteria | <i>Mesorhizobium</i>     | <i>loti</i> MAFF303099                                  | 7.6  | 968 | TransportDB |
| Bacteria | <i>Micrococcus</i>       | <i>luteus</i> NCTC2665                                  | 2.5  | 225 | TransportDB |
| Bacteria | <i>Magnetospirillum</i>  | <i>magneticum</i> AMB1                                  | 4.97 | 374 | TransportDB |
| Bacteria | <i>Mycobacterium</i>     | <i>marinum</i> M                                        | 6.66 | 385 | TransportDB |
| Bacteria | <i>Modestobacter</i>     | <i>marinus</i>                                          | 5.58 | 528 | TransportDB |
| Bacteria | <i>Magnetococcus</i>     | <i>marinus</i> MC1                                      | 4.72 | 237 | TransportDB |
| Bacteria | <i>Maricaulis</i>        | <i>maris</i> MCS10                                      | 3.37 | 231 | TransportDB |
| Bacteria | <i>Mycobacterium</i>     | <i>massiliense</i> str GO06                             | 5.07 | 293 | TransportDB |
| Bacteria | <i>Marinomonas</i>       | <i>mediterranea</i> MMB1                                | 4.68 | 535 | TransportDB |
| Bacteria | <i>Methylomonas</i>      | <i>methanica</i> MC09                                   | 5.05 | 298 | TransportDB |
| Bacteria | <i>Mycoplasma</i>        | <i>mobile</i> 163K                                      | 0.78 | 74  | TransportDB |
| Bacteria | <i>Methylotenera</i>     | <i>mobilis</i> JLW8                                     | 2.55 | 193 | TransportDB |
| Bacteria | <i>Morganella</i>        | <i>morganii</i> subsp <i>morganii</i> KT                | 3.8  | 492 | TransportDB |
| Bacteria | <i>Mycoplasma</i>        | <i>mycoides</i> subsp <i>capri</i> LC str 95010         | 1.16 | 104 | TransportDB |
| Bacteria | <i>Mycoplasma</i>        | <i>mycoides</i> subsp <i>mycoides</i> SC str Gladysdale | 1.19 | 112 | TransportDB |
| Bacteria | <i>Mycoplasma</i>        | <i>mycoides</i> subsp <i>mycoides</i> SC str PG1        | 1.21 | 104 | TransportDB |
| Bacteria | <i>Mycobacterium</i>     | <i>neoaurum</i> VKMAc1815D                              | 5.44 | 508 | TransportDB |
| Bacteria | <i>Methylobacterium</i>  | <i>nodulans</i> ORS2060                                 | 8.84 | 762 | TransportDB |
| Bacteria | <i>Mesorhizobium</i>     | <i>opportunatum</i> WSM2075                             | 6.88 | 981 | TransportDB |
| Bacteria | <i>Mycoplasma</i>        | <i>ovis</i> str Michigan                                | 0.7  | 33  | TransportDB |
| Bacteria | <i>Mycoplasma</i>        | <i>parvum</i> str Indiana                               | 0.56 | 33  | TransportDB |
| Bacteria | <i>Mycoplasma</i>        | <i>penetrans</i> HF2                                    | 1.36 | 99  | TransportDB |
| Bacteria | <i>Methylibium</i>       | <i>petroleiphilum</i> PM1                               | 4.64 | 387 | TransportDB |
| Bacteria | <i>Micrococcus</i>       | <i>phosphovor</i> NM1                                   | 5.68 | 515 | TransportDB |
| Bacteria | <i>Marinitoga</i>        | <i>piezophila</i> KA3                                   | 2.24 | 278 | TransportDB |
| Bacteria | <i>Melissococcus</i>     | <i>plutonius</i> ATCC35311                              | 2.07 | 295 | TransportDB |
| Bacteria | <i>Melissococcus</i>     | <i>plutonius</i> DAT561                                 | 2.05 | 267 | TransportDB |
| Bacteria | <i>Mycoplasma</i>        | <i>pneumoniae</i> 309                                   | 0.82 | 69  | TransportDB |
| Bacteria | <i>Mycoplasma</i>        | <i>pneumoniae</i> FH                                    | 0.81 | 60  | TransportDB |

|          |                         |                                   |       |     |             |
|----------|-------------------------|-----------------------------------|-------|-----|-------------|
| Bacteria | <i>Mycoplasma</i>       | <i>pneumoniae</i> M129            | 0.82  | 70  | TransportDB |
| Bacteria | <i>Mycoplasma</i>       | <i>pneumoniae</i> M129B7          | 0.82  | 69  | TransportDB |
| Bacteria | <i>Methylobacterium</i> | <i>populi</i> BJ001               | 5.85  | 474 | TransportDB |
| Bacteria | <i>Marinomonas</i>      | <i>posidonica</i> IVIAPo181       | 3.9   | 533 | TransportDB |
| Bacteria | <i>Mesotoga</i>         | <i>prima</i> MesG1Ag42            | 2.98  | 442 | TransportDB |
| Bacteria | <i>Mycoplasma</i>       | <i>pulmonis</i> UABCTIP           | 0.96  | 103 | TransportDB |
| Bacteria | <i>Mycoplasma</i>       | <i>putrefaciens</i> KS1           | 0.83  | 69  | TransportDB |
| Bacteria | <i>Mycoplasma</i>       | <i>putrefaciens</i> Mput9231      | 0.86  | 70  | TransportDB |
| Bacteria | <i>Methylobacterium</i> | <i>radiotolerans</i> JCM2831      | 6.9   | 684 | TransportDB |
| Bacteria | <i>Mycobacterium</i>    | <i>rhodesiae</i> NBB3             | 6.42  | 459 | TransportDB |
| Bacteria | <i>Melioribacter</i>    | <i>roseus</i> P3M2                | 3.3   | 211 | TransportDB |
| Bacteria | <i>Meiothermus</i>      | <i>ruber</i> DSM1279              | 3.1   | 378 | TransportDB |
| Bacteria | <i>Muricauda</i>        | <i>ruestringensis</i> DSM13258    | 3.84  | 208 | TransportDB |
| Bacteria | <i>Meiothermus</i>      | <i>silvanus</i> DSM9946           | 3.72  | 393 | TransportDB |
| Bacteria | <i>Methylocella</i>     | <i>silvestris</i> BL2             | 4.31  | 335 | TransportDB |
| Bacteria | <i>Mycobacterium</i>    | <i>smegmatis</i> JS623            | 7.22  | 497 | TransportDB |
| Bacteria | <i>Mycobacterium</i>    | <i>smegmatis</i> str MC2155       | 6.99  | 713 | TransportDB |
| Bacteria | <i>Methylobacterium</i> | <i>s446</i>                       | 7.74  | 773 | TransportDB |
| Bacteria | <i>Mesorhizobium</i>    | <i>sBNC1</i>                      | 4.41  | 650 | TransportDB |
| Bacteria | <i>Marinobacter</i>     | <i>sBSs20148</i>                  | 4.06  | 556 | TransportDB |
| Bacteria | <i>Maribacter</i>       | <i>sHTCC2170</i>                  | 3.87  | 211 | TransportDB |
| Bacteria | <i>Methylophaga</i>     | <i>sJAM1</i>                      | 3.14  | 253 | TransportDB |
| Bacteria | <i>Methylophaga</i>     | <i>sJAM7</i>                      | 2.75  | 228 | TransportDB |
| Bacteria | <i>Mycobacterium</i>    | <i>sJDM601</i>                    | 4.64  | 263 | TransportDB |
| Bacteria | <i>Mycobacterium</i>    | <i>sJLS</i>                       | 6.05  | 475 | TransportDB |
| Bacteria | <i>Mycobacterium</i>    | <i>sKMS</i>                       | 6.26  | 463 | TransportDB |
| Bacteria | <i>Micromonospora</i>   | <i>sL5</i>                        | 6.96  | 587 | TransportDB |
| Bacteria | <i>Magnetococcus</i>    | <i>sMC-1</i>                      | 4.7   | 233 | TransportDB |
| Bacteria | <i>Mycobacterium</i>    | <i>sMCS</i>                       | 5.92  | 447 | TransportDB |
| Bacteria | <i>Mycobacterium</i>    | <i>sMOTT36Y</i>                   | 5.61  | 320 | TransportDB |
| Bacteria | <i>Methylovorus</i>     | <i>sMP688</i>                     | 2.86  | 226 | TransportDB |
| Bacteria | <i>Marinomonas</i>      | <i>sMWYL1</i>                     | 5.1   | 715 | TransportDB |
| Bacteria | <i>Microcoleus</i>      | <i>sPCC7113</i>                   | 7.97  | 422 | TransportDB |
| Bacteria | <i>Methylocystis</i>    | <i>sSC2</i>                       | 3.77  | 238 | TransportDB |
| Bacteria | <i>Myxococcus</i>       | <i>stipitatus</i> DSM14675        | 10.35 | 468 | TransportDB |
| Bacteria | <i>Mannheimia</i>       | <i>succiniciproducens</i> MBEL55E | 2.31  | 304 | TransportDB |
| Bacteria | <i>Mycoplasma</i>       | <i>suis</i> KI3806                | 0.71  | 31  | TransportDB |
| Bacteria | <i>Mycoplasma</i>       | <i>suis</i> str Illinois          | 0.74  | 32  | TransportDB |
| Bacteria | <i>Mycoplasma</i>       | <i>synoviae</i> 53                | 0.8   | 77  | TransportDB |
| Bacteria | <i>Microbacterium</i>   | <i>testaceum</i> StLB037          | 3.98  | 507 | TransportDB |
| Bacteria | <i>Moorella</i>         | <i>thermoacetica</i> ATCC39073    | 2.63  | 235 | TransportDB |
| Bacteria | <i>Marivirga</i>        | <i>tractuosa</i> DSM4126          | 4.52  | 248 | TransportDB |
| Bacteria | <i>Mycobacterium</i>    | <i>tuberculosis</i> 719999        | 4.42  | 268 | TransportDB |
| Bacteria | <i>Mycobacterium</i>    | <i>tuberculosis</i> CASNITR204    | 4.39  | 222 | TransportDB |
| Bacteria | <i>Mycobacterium</i>    | <i>tuberculosis</i> CCDC5079      | 4.41  | 266 | TransportDB |
| Bacteria | <i>Mycobacterium</i>    | <i>tuberculosis</i> CCDC5180      | 4.41  | 254 | TransportDB |
| Bacteria | <i>Mycobacterium</i>    | <i>tuberculosis</i> CDC1551       | 4.4   | 264 | TransportDB |

|          |                         |                                                           |      |     |             |
|----------|-------------------------|-----------------------------------------------------------|------|-----|-------------|
| Bacteria | <i>Mycobacterium</i>    | <i>tuberculosis</i> CTRI2                                 | 4.4  | 265 | TransportDB |
| Bacteria | <i>Mycobacterium</i>    | <i>tuberculosis</i> EAI5                                  | 4.39 | 254 | TransportDB |
| Bacteria | <i>Mycobacterium</i>    | <i>tuberculosis</i> EAI5NITR206                           | 4.39 | 251 | TransportDB |
| Bacteria | <i>Mycobacterium</i>    | <i>tuberculosis</i> F11                                   | 4.42 | 267 | TransportDB |
| Bacteria | <i>Mycobacterium</i>    | <i>tuberculosis</i> H37Ra                                 | 4.42 | 268 | TransportDB |
| Bacteria | <i>Mycobacterium</i>    | <i>tuberculosis</i> H37Rv                                 | 4.41 | 267 | TransportDB |
| Bacteria | <i>Mycobacterium</i>    | <i>tuberculosis</i> KZN1435                               | 4.4  | 265 | TransportDB |
| Bacteria | <i>Mycobacterium</i>    | <i>tuberculosis</i> KZN4207                               | 4.39 | 264 | TransportDB |
| Bacteria | <i>Mycobacterium</i>    | <i>tuberculosis</i> KZN605                                | 4.4  | 263 | TransportDB |
| Bacteria | <i>Mycobacterium</i>    | <i>tuberculosis</i> RGTB327                               | 4.38 | 206 | TransportDB |
| Bacteria | <i>Mycobacterium</i>    | <i>tuberculosis</i> RGTB423                               | 4.41 | 194 | TransportDB |
| Bacteria | <i>Mycobacterium</i>    | <i>tuberculosis</i> str Beijing<br>NITR203                | 4.41 | 256 | TransportDB |
| Bacteria | <i>Mycobacterium</i>    | <i>tuberculosis</i> str Erdman<br>ATCC35801               | 4.39 | 259 | TransportDB |
| Bacteria | <i>Mycobacterium</i>    | <i>tuberculosis</i> str Haarlem                           | 4.41 | 265 | TransportDB |
| Bacteria | <i>Mycobacterium</i>    | <i>tuberculosis</i> str Haarlem<br>NITR202                | 4.4  | 198 | TransportDB |
| Bacteria | <i>Mycobacterium</i>    | <i>tuberculosis</i> UT205                                 | 4.42 | 262 | TransportDB |
| Bacteria | <i>Mycobacterium</i>    | <i>ulcerans</i> Agy99                                     | 5.81 | 252 | TransportDB |
| Bacteria | <i>Mycobacterium</i>    | <i>vanbaalenii</i> PYR1                                   | 6.49 | 506 | TransportDB |
| Bacteria | <i>Methylobacterium</i> | <i>versatilis</i> 301                                     | 3.06 | 240 | TransportDB |
| Bacteria | <i>Mycoplasma</i>       | <i>wenyonii</i> str Massachusetts                         | 0.65 | 38  | TransportDB |
| Bacteria | <i>Myxococcus</i>       | <i>xanthus</i> DK1622                                     | 9.14 | 436 | TransportDB |
| Bacteria | <i>Mycobacterium</i>    | <i>yongonense</i> 051390                                  | 5.66 | 327 | TransportDB |
| Bacteria | <i>Nocardiopsis</i>     | <i>alba</i> ATCCBAA2165                                   | 5.85 | 543 | TransportDB |
| Bacteria | <i>Novosphingobium</i>  | <i>aromaticivorans</i> DSM12444                           | 4.23 | 242 | TransportDB |
| Bacteria | <i>Nocardia</i>         | <i>brasiliensis</i> ATCC700358                            | 9.44 | 734 | TransportDB |
| Bacteria | <i>Nocardia</i>         | <i>cyriacigeorgica</i> GUH2                               | 6.19 | 446 | TransportDB |
| Bacteria | <i>Nocardiopsis</i>     | <i>dassonvillei</i> subsp <i>dassonvillei</i><br>DSM43111 | 6.54 | 597 | TransportDB |
| Bacteria | <i>Nonlabens</i>        | <i>dokdonensis</i> DSW6                                   | 3.91 | 207 | TransportDB |
| Bacteria | <i>Nitrosomonas</i>     | <i>europaea</i> ATCC19718                                 | 2.81 | 189 | TransportDB |
| Bacteria | <i>Nitrosomonas</i>     | <i>eutropha</i> C91                                       | 2.78 | 228 | TransportDB |
| Bacteria | <i>Nocardia</i>         | <i>farcinica</i> IFM10152                                 | 6.29 | 483 | TransportDB |
| Bacteria | <i>Neisseria</i>        | <i>gonorrhoeae</i> FA1090                                 | 2.15 | 153 | TransportDB |
| Bacteria | <i>Neisseria</i>        | <i>gonorrhoeae</i> NCCP11945                              | 2.24 | 182 | TransportDB |
| Bacteria | <i>Neisseria</i>        | <i>gonorrhoeae</i> TDCNG08107                             | 2.19 | 182 | TransportDB |
| Bacteria | <i>Nitrosococcus</i>    | <i>halophilus</i> Nc4                                     | 4.15 | 292 | TransportDB |
| Bacteria | <i>Nitrobacter</i>      | <i>hamburgensis</i> X14                                   | 5.01 | 323 | TransportDB |
| Bacteria | <i>Nastella</i>         | <i>koreensis</i> GR2010                                   | 9.03 | 373 | TransportDB |
| Bacteria | <i>Neisseria</i>        | <i>lactamica</i> 02006                                    | 2.22 | 160 | TransportDB |
| Bacteria | <i>Neisseria</i>        | <i>meningitidis</i> 053442                                | 2.15 | 155 | TransportDB |
| Bacteria | <i>Neisseria</i>        | <i>meningitidis</i> 8013                                  | 2.28 | 166 | TransportDB |
| Bacteria | <i>Neisseria</i>        | <i>meningitidis</i> alpha14                               | 2.15 | 163 | TransportDB |
| Bacteria | <i>Neisseria</i>        | <i>meningitidis</i> alpha710                              | 2.24 | 163 | TransportDB |
| Bacteria | <i>Neisseria</i>        | <i>meningitidis</i> FAM18                                 | 2.19 | 165 | TransportDB |

|          |                         |                                  |      |     |             |
|----------|-------------------------|----------------------------------|------|-----|-------------|
| Bacteria | <i>Neisseria</i>        | <i>meningitidis</i> G2136        | 2.18 | 165 | TransportDB |
| Bacteria | <i>Neisseria</i>        | <i>meningitidis</i> H4476        | 2.24 | 160 | TransportDB |
| Bacteria | <i>Neisseria</i>        | <i>meningitidis</i> M01240149    | 2.22 | 160 | TransportDB |
| Bacteria | <i>Neisseria</i>        | <i>meningitidis</i> M01240355    | 2.29 | 162 | TransportDB |
| Bacteria | <i>Neisseria</i>        | <i>meningitidis</i> M04240196    | 2.25 | 162 | TransportDB |
| Bacteria | <i>Neisseria</i>        | <i>meningitidis</i> MC58         | 2.27 | 162 | TransportDB |
| Bacteria | <i>Neisseria</i>        | <i>meningitidis</i> NZ0533       | 2.25 | 160 | TransportDB |
| Bacteria | <i>Neisseria</i>        | <i>meningitidis</i> WUE2594      | 2.23 | 154 | TransportDB |
| Bacteria | <i>Neisseria</i>        | <i>meningitidis</i> Z2491        | 2.18 | 160 | TransportDB |
| Bacteria | <i>Nitrosospira</i>     | <i>multiformis</i> ATCC25196     | 3.23 | 235 | TransportDB |
| Bacteria | <i>Nakamurella</i>      | <i>multipartita</i> DSM44233     | 6.06 | 463 | TransportDB |
| Bacteria | <i>Nitrosococcus</i>    | <i>oceanii</i> ATCC19707         | 3.52 | 243 | TransportDB |
| Bacteria | <i>Nautilia</i>         | <i>profundicola</i> AmH          | 1.68 | 164 | TransportDB |
| Bacteria | <i>Nostoc</i>           | <i>punctiforme</i> PCC73102      | 9.06 | 463 | TransportDB |
| Bacteria | <i>Neorickettsia</i>    | <i>risticii</i> str Illinois     | 0.88 | 66  | TransportDB |
| Bacteria | <i>Nitratifractor</i>   | <i>salsuginis</i> DSM16511       | 2.1  | 153 | TransportDB |
| Bacteria | <i>Neorickettsia</i>    | <i>sennetsu</i> str Miyayama     | 0.86 | 67  | TransportDB |
| Bacteria | <i>Nitrosomonas</i>     | <i>sAL212</i>                    | 3.34 | 234 | TransportDB |
| Bacteria | <i>Nitrosomonas</i>     | <i>sls79A3</i>                   | 3.78 | 213 | TransportDB |
| Bacteria | <i>Nocardioides</i>     | <i>sJS614</i>                    | 5.29 | 459 | TransportDB |
| Bacteria | <i>Nostoc</i>           | <i>sPCC7107</i>                  | 6.33 | 388 | TransportDB |
| Bacteria | <i>Nostoc</i>           | <i>sPCC7120</i>                  | 7.21 | 481 | TransportDB |
| Bacteria | <i>Nostoc</i>           | <i>sPCC7524</i>                  | 6.72 | 422 | TransportDB |
| Bacteria | <i>Novosphingobium</i>  | <i>sPP1Y</i>                     | 5.31 | 321 | TransportDB |
| Bacteria | <i>Nitratiruptor</i>    | <i>sSB1552</i>                   | 1.88 | 151 | TransportDB |
| Bacteria | <i>Natranaerobius</i>   | <i>thermophilus</i> JWNMWNLF     | 3.19 | 315 | TransportDB |
| Bacteria | <i>Nitrosococcus</i>    | <i>watsonii</i> C113             | 3.37 | 248 | TransportDB |
| Bacteria | <i>Nitrobacter</i>      | <i>winogradskyi</i> Nb255        | 3.4  | 215 | TransportDB |
| Bacteria | <i>Oscillatoria</i>     | <i>acuminata</i> PCC6304         | 7.8  | 329 | TransportDB |
| Bacteria | <i>Octadecabacter</i>   | <i>antarcticus</i> 307           | 4.88 | 558 | TransportDB |
| Bacteria | <i>Ochrobactrum</i>     | <i>anthropi</i> ATCC49188        | 5.21 | 855 | TransportDB |
| Bacteria | <i>Octadecabacter</i>   | <i>arcticus</i> 238              | 5.48 | 525 | TransportDB |
| Bacteria | <i>Oligotropha</i>      | <i>carboxidovorans</i> OM4       | 3.84 | 401 | TransportDB |
| Bacteria | <i>Oligotropha</i>      | <i>carboxidovorans</i> OM5       | 3.9  | 409 | TransportDB |
| Bacteria | <i>Owenweeksia</i>      | <i>hongkongensis</i> DSM17368    | 4.0  | 208 | TransportDB |
| Bacteria | <i>Oceanobacillus</i>   | <i>iheyensis</i> HTE831          | 3.63 | 505 | TransportDB |
| Bacteria | <i>Oscillatoria</i>     | <i>nigro-viridis</i> PCC7112     | 8.27 | 377 | TransportDB |
| Bacteria | <i>Oenococcus</i>       | <i>oeni</i> PSU1                 | 1.78 | 266 | TransportDB |
| Bacteria | <i>Oceanithermus</i>    | <i>profundus</i> DSM14977        | 2.44 | 282 | TransportDB |
| Bacteria | <i>Ornithobacterium</i> | <i>rhinotracheale</i> DSM15997   | 2.4  | 139 | TransportDB |
| Bacteria | <i>Oceanimonas</i>      | <i>sGK1</i>                      | 3.53 | 439 | TransportDB |
| Bacteria | <i>Odoribacter</i>      | <i>splanchnicus</i> DSM20712     | 4.39 | 231 | TransportDB |
| Bacteria | <i>Opitutus</i>         | <i>terrae</i> PB901              | 5.96 | 348 | TransportDB |
| Bacteria | <i>Orientia</i>         | <i>tsutsugamushi</i> str Boryong | 2.13 | 83  | TransportDB |
| Bacteria | <i>Orientia</i>         | <i>tsutsugamushi</i> str Ikeda   | 2.01 | 120 | TransportDB |
| Bacteria | <i>Olsenella</i>        | <i>uli</i> DSM7084               | 2.05 | 250 | TransportDB |
| Bacteria | <i>Oscillibacter</i>    | <i>valericigenes</i> Sjm1820     | 4.47 | 412 | TransportDB |

|          |                          |                                                             |      |     |             |
|----------|--------------------------|-------------------------------------------------------------|------|-----|-------------|
| Bacteria | <i>Onion</i>             | <i>yellow's phytoplasma OYM</i>                             | 0.85 | 64  | TransportDB |
| Bacteria | <i>Parachlamydia</i>     | <i>acanthamoebae UV7</i>                                    | 3.07 | 208 | TransportDB |
| Bacteria | <i>Propionibacterium</i> | <i>acidipropionici ATCC4875</i>                             | 3.66 | 431 | TransportDB |
| Bacteria | <i>Propionibacterium</i> | <i>acnes 266</i>                                            | 2.49 | 321 | TransportDB |
| Bacteria | <i>Propionibacterium</i> | <i>acnes 6609</i>                                           | 2.56 | 323 | TransportDB |
| Bacteria | <i>Propionibacterium</i> | <i>acnes ATCC11828</i>                                      | 2.49 | 314 | TransportDB |
| Bacteria | <i>Propionibacterium</i> | <i>acnes C1</i>                                             | 2.52 | 327 | TransportDB |
| Bacteria | <i>Propionibacterium</i> | <i>acnes HL096PA1</i>                                       | 2.55 | 311 | TransportDB |
| Bacteria | <i>Propionibacterium</i> | <i>acnes KPA171202</i>                                      | 2.56 | 324 | TransportDB |
| Bacteria | <i>Propionibacterium</i> | <i>acnes SK137</i>                                          | 2.5  | 324 | TransportDB |
| Bacteria | <i>Propionibacterium</i> | <i>acnes Type IA2 Pacn17</i>                                | 2.52 | 316 | TransportDB |
| Bacteria | <i>Propionibacterium</i> | <i>acnes Type IA2 Pacn31</i>                                | 2.5  | 315 | TransportDB |
| Bacteria | <i>Propionibacterium</i> | <i>acnes Type IA2 Pacn33</i>                                | 2.49 | 315 | TransportDB |
| Bacteria | <i>Pseudomonas</i>       | <i>aeruginosa B13633</i>                                    | 6.42 | 697 | TransportDB |
| Bacteria | <i>Pseudomonas</i>       | <i>aeruginosa c7447m</i>                                    | 6.26 | 707 | TransportDB |
| Bacteria | <i>Pseudomonas</i>       | <i>aeruginosa DK2</i>                                       | 6.4  | 702 | TransportDB |
| Bacteria | <i>Pseudomonas</i>       | <i>aeruginosa LES431</i>                                    | 6.55 | 712 | TransportDB |
| Bacteria | <i>Pseudomonas</i>       | <i>aeruginosa LESB58</i>                                    | 6.6  | 711 | TransportDB |
| Bacteria | <i>Pseudomonas</i>       | <i>aeruginosa M18</i>                                       | 6.33 | 703 | TransportDB |
| Bacteria | <i>Pseudomonas</i>       | <i>aeruginosa MTB1</i>                                      | 6.58 | 689 | TransportDB |
| Bacteria | <i>Pseudomonas</i>       | <i>aeruginosa NCGM2S1</i>                                   | 6.76 | 709 | TransportDB |
| Bacteria | <i>Pseudomonas</i>       | <i>aeruginosa PA1</i>                                       | 6.53 | 706 | TransportDB |
| Bacteria | <i>Pseudomonas</i>       | <i>aeruginosa PA1R</i>                                      | 6.31 | 682 | TransportDB |
| Bacteria | <i>Pseudomonas</i>       | <i>aeruginosa PA7</i>                                       | 6.59 | 681 | TransportDB |
| Bacteria | <i>Pseudomonas</i>       | <i>aeruginosa PAO1</i>                                      | 6.26 | 706 | TransportDB |
| Bacteria | <i>Pseudomonas</i>       | <i>aeruginosa PAO1VE13</i>                                  | 6.27 | 707 | TransportDB |
| Bacteria | <i>Pseudomonas</i>       | <i>aeruginosa PAO1VE2</i>                                   | 6.27 | 708 | TransportDB |
| Bacteria | <i>Pseudomonas</i>       | <i>aeruginosa PAO581</i>                                    | 6.04 | 686 | TransportDB |
| Bacteria | <i>Pseudomonas</i>       | <i>aeruginosa RP73</i>                                      | 6.34 | 697 | TransportDB |
| Bacteria | <i>Pseudomonas</i>       | <i>aeruginosa SCV20265</i>                                  | 6.73 | 716 | TransportDB |
| Bacteria | <i>Pseudomonas</i>       | <i>aeruginosa UCBPPPA14</i>                                 | 6.54 | 705 | TransportDB |
| Bacteria | <i>Prosthecochloris</i>  | <i>aestuarii DSM271</i>                                     | 2.58 | 205 | TransportDB |
| Bacteria | <i>Paracoccus</i>        | <i>aminophilus JCM7686</i>                                  | 4.87 | 726 | TransportDB |
| Bacteria | <i>Pantoea</i>           | <i>ananatis AJ13355</i>                                     | 4.88 | 686 | TransportDB |
| Bacteria | <i>Pantoea</i>           | <i>ananatis LMG20103</i>                                    | 4.7  | 683 | TransportDB |
| Bacteria | <i>Pantoea</i>           | <i>ananatis LMG5342</i>                                     | 4.91 | 680 | TransportDB |
| Bacteria | <i>Pantoea</i>           | <i>ananatis PA13</i>                                        | 4.87 | 689 | TransportDB |
| Bacteria | <i>Psychrobacter</i>     | <i>arcticus 2734</i>                                        | 2.65 | 174 | TransportDB |
| Bacteria | <i>Porphyromonas</i>     | <i>asaccharolytica DSM20707</i>                             | 2.19 | 108 | TransportDB |
| Bacteria | <i>Photorhabdus</i>      | <i>asymbiotica</i>                                          | 5.09 | 405 | TransportDB |
| Bacteria | <i>Pseudoalteromonas</i> | <i>atlantica T6c</i>                                        | 5.19 | 363 | TransportDB |
| Bacteria | <i>Pectobacterium</i>    | <i>atrosepticum SCRI1043</i>                                | 5.06 | 699 | TransportDB |
| Bacteria | <i>Propionibacterium</i> | <i>avidum 44067</i>                                         | 2.53 | 309 | TransportDB |
| Bacteria | <i>Parvularcula</i>      | <i>bermudensis HTCC2503</i>                                 | 2.9  | 225 | TransportDB |
| Bacteria | <i>Planctomyces</i>      | <i>brasiliensis DSM5305</i>                                 | 6.01 | 268 | TransportDB |
| Bacteria | <i>Pseudomonas</i>       | <i>brassicacearum</i> subsp<br><i>brassicacearum NFM421</i> | 6.84 | 783 | TransportDB |
| Bacteria | <i>Pelobacter</i>        | <i>carbinolicus DSM2380</i>                                 | 3.67 | 295 | TransportDB |

|          |                          |                                                          |      |     |             |
|----------|--------------------------|----------------------------------------------------------|------|-----|-------------|
| Bacteria | <i>Pectobacterium</i>    | <i>carotovorum</i> subsp<br><i>carotovorum</i> PC1       | 4.86 | 720 | TransportDB |
| Bacteria | <i>Pectobacterium</i>    | <i>carotovorum</i> subsp<br><i>carotovorum</i> PCC21     | 4.84 | 703 | TransportDB |
| Bacteria | <i>Pediococcus</i>       | <i>claussenii</i> ATCCBAA344                             | 1.98 | 245 | TransportDB |
| Bacteria | <i>Psychrobacter</i>     | <i>cryohalolentis</i> K5                                 | 3.1  | 261 | TransportDB |
| Bacteria | <i>Pseudomonas</i>       | <i>denitrificans</i> ATCC13867                           | 5.7  | 599 | TransportDB |
| Bacteria | <i>Paracoccus</i>        | <i>denitrificans</i> PD1222                              | 5.24 | 801 | TransportDB |
| Bacteria | <i>Prevotella</i>        | <i>dentalis</i> DSM3688                                  | 3.35 | 152 | TransportDB |
| Bacteria | <i>Prevotella</i>        | <i>denticola</i> F0289                                   | 2.94 | 136 | TransportDB |
| Bacteria | <i>Pseudonocardia</i>    | <i>dioxanivorans</i> CB1190                              | 7.44 | 560 | TransportDB |
| Bacteria | <i>Parabacteroides</i>   | <i>distasonis</i> ATCC8503                               | 4.81 | 295 | TransportDB |
| Bacteria | <i>Pseudomonas</i>       | <i>entomophila</i> L48                                   | 5.89 | 611 | TransportDB |
| Bacteria | <i>Pseudomonas</i>       | <i>fluorescens</i> A506                                  | 6.02 | 688 | TransportDB |
| Bacteria | <i>Pseudomonas</i>       | <i>fluorescens</i> F113                                  | 6.85 | 768 | TransportDB |
| Bacteria | <i>Pseudomonas</i>       | <i>fluorescens</i> Pf01                                  | 6.44 | 709 | TransportDB |
| Bacteria | <i>Pseudomonas</i>       | <i>fluorescens</i> Pf-5                                  | 7.07 | 767 | TransportDB |
| Bacteria | <i>Pseudomonas</i>       | <i>fluorescens</i> SBW25                                 | 6.72 | 807 | TransportDB |
| Bacteria | <i>Propionibacterium</i> | <i>freudenreichii</i> subsp <i>shermanii</i><br>CIRMBIA1 | 2.62 | 261 | TransportDB |
| Bacteria | <i>Pseudomonas</i>       | <i>fulva</i> 12X                                         | 4.92 | 606 | TransportDB |
| Bacteria | <i>Phaeobacter</i>       | <i>gallaeciensis</i> 210                                 | 4.16 | 509 | TransportDB |
| Bacteria | <i>Phaeobacter</i>       | <i>gallaeciensis</i><br>DSM17395CIP105210                | 4.23 | 505 | TransportDB |
| Bacteria | <i>Phaeobacter</i>       | <i>gallaeciensis</i> DSM26640                            | 4.54 | 569 | TransportDB |
| Bacteria | <i>Polymorphum</i>       | <i>gilvum</i> SL003B26A1                                 | 4.72 | 581 | TransportDB |
| Bacteria | <i>Porphyromonas</i>     | <i>gingivalis</i> ATCC33277                              | 2.35 | 128 | TransportDB |
| Bacteria | <i>Porphyromonas</i>     | <i>gingivalis</i> TDC60                                  | 2.34 | 127 | TransportDB |
| Bacteria | <i>Porphyromonas</i>     | <i>gingivalis</i> W83                                    | 2.34 | 113 | TransportDB |
| Bacteria | <i>Pseudoalteromonas</i> | <i>haloplanktis</i> TAC125                               | 3.85 | 295 | TransportDB |
| Bacteria | <i>Pelagibacterium</i>   | <i>halotolerans</i> B2                                   | 3.95 | 649 | TransportDB |
| Bacteria | <i>Pedobacter</i>        | <i>heparinus</i> DSM2366                                 | 5.17 | 257 | TransportDB |
| Bacteria | <i>Psychromonas</i>      | <i>ingrahamii</i> 37                                     | 4.56 | 479 | TransportDB |
| Bacteria | <i>Prevotella</i>        | <i>intermedia</i> 17                                     | 2.7  | 111 | TransportDB |
| Bacteria | <i>Paenibacillus</i>     | <i>larvae</i> subsp <i>larvae</i><br>DSM25430            | 4.06 | 391 | TransportDB |
| Bacteria | <i>Parvibaculum</i>      | <i>lavamentivorans</i> DS1                               | 3.91 | 306 | TransportDB |
| Bacteria | <i>Planctomyces</i>      | <i>limnophilus</i> DSM3776                               | 5.46 | 223 | TransportDB |
| Bacteria | <i>Photorhabdus</i>      | <i>luminescens</i> subsp <i>laumondii</i><br>TTO1        | 5.69 | 417 | TransportDB |
| Bacteria | <i>Pelodictyon</i>       | <i>luteolum</i> DSM 273                                  | 2.36 | 183 | TransportDB |
| Bacteria | <i>Persephonella</i>     | <i>marina</i> EXH1                                       | 1.98 | 144 | TransportDB |
| Bacteria | <i>Prochlorococcus</i>   | <i>marinus</i> str AS9601                                | 1.67 | 103 | TransportDB |
| Bacteria | <i>Prochlorococcus</i>   | <i>marinus</i> str MIT9211                               | 1.69 | 107 | TransportDB |
| Bacteria | <i>Prochlorococcus</i>   | <i>marinus</i> str MIT9215                               | 1.74 | 102 | TransportDB |
| Bacteria | <i>Prochlorococcus</i>   | <i>marinus</i> str MIT9301                               | 1.64 | 109 | TransportDB |
| Bacteria | <i>Prochlorococcus</i>   | <i>marinus</i> str MIT9303                               | 2.68 | 177 | TransportDB |
| Bacteria | <i>Prochlorococcus</i>   | <i>marinus</i> str MIT9312                               | 1.71 | 115 | TransportDB |

|          |                          |                                                         |      |      |             |
|----------|--------------------------|---------------------------------------------------------|------|------|-------------|
| Bacteria | <i>Prochlorococcus</i>   | <i>marinus</i> str MIT9313                              | 2.41 | 162  | TransportDB |
| Bacteria | <i>Prochlorococcus</i>   | <i>marinus</i> str MIT9515                              | 1.7  | 105  | TransportDB |
| Bacteria | <i>Prochlorococcus</i>   | <i>marinus</i> str NATL1A                               | 1.86 | 118  | TransportDB |
| Bacteria | <i>Prochlorococcus</i>   | <i>marinus</i> str NATL2A                               | 1.84 | 117  | TransportDB |
| Bacteria | <i>Prochlorococcus</i>   | <i>marinus</i> subsp <i>marinus</i> str CCMP1375        | 1.75 | 107  | TransportDB |
| Bacteria | <i>Prochlorococcus</i>   | <i>marinus</i> subsp <i>pastoris</i> str CCMP1986       | 1.66 | 106  | TransportDB |
| Bacteria | <i>Prevotella</i>        | <i>melaninogenica</i> ATCC25845                         | 3.17 | 125  | TransportDB |
| Bacteria | <i>Pseudomonas</i>       | <i>mendocina</i> NK01                                   | 5.43 | 608  | TransportDB |
| Bacteria | <i>Pseudomonas</i>       | <i>mendocina</i> ymp                                    | 5.07 | 565  | TransportDB |
| Bacteria | <i>Phycisphaera</i>      | <i>mikurensis</i> NBRC102666                            | 3.88 | 237  | TransportDB |
| Bacteria | <i>Proteus</i>           | <i>mirabilis</i> BB2000                                 | 3.85 | 429  | TransportDB |
| Bacteria | <i>Proteus</i>           | <i>mirabilis</i> HI4320                                 | 4.1  | 430  | TransportDB |
| Bacteria | <i>Petrotoga</i>         | <i>mobilis</i> SJ95                                     | 2.17 | 303  | TransportDB |
| Bacteria | <i>Pseudomonas</i>       | <i>monteillii</i> SB3078                                | 6.0  | 648  | TransportDB |
| Bacteria | <i>Pseudomonas</i>       | <i>monteillii</i> SB3101                                | 5.95 | 648  | TransportDB |
| Bacteria | <i>Paenibacillus</i>     | <i>mucilaginosus</i> 3016                               | 8.74 | 1020 | TransportDB |
| Bacteria | <i>Paenibacillus</i>     | <i>mucilaginosus</i> K02                                | 8.82 | 1031 | TransportDB |
| Bacteria | <i>Paenibacillus</i>     | <i>mucilaginosus</i> KNP414                             | 8.66 | 1038 | TransportDB |
| Bacteria | <i>Pasteurella</i>       | <i>multocida</i> 36950                                  | 2.35 | 310  | TransportDB |
| Bacteria | <i>Pasteurella</i>       | <i>multocida</i> subsp <i>multocida</i> str 3480        | 2.38 | 320  | TransportDB |
| Bacteria | <i>Pasteurella</i>       | <i>multocida</i> subsp <i>multocida</i> str HN06        | 2.41 | 316  | TransportDB |
| Bacteria | <i>Pasteurella</i>       | <i>multocida</i> subsp <i>multocida</i> str Pm70        | 2.26 | 317  | TransportDB |
| Bacteria | <i>Polaromonas</i>       | <i>naphthalenivorans</i> CJ2                            | 5.37 | 517  | TransportDB |
| Bacteria | <i>Polynucleobacter</i>  | <i>necessarius</i> subsp <i>asymbioticus</i> QLWP1DMWA1 | 2.16 | 215  | TransportDB |
| Bacteria | <i>Polynucleobacter</i>  | <i>necessarius</i> subsp <i>necessarius</i> STIR1       | 1.56 | 107  | TransportDB |
| Bacteria | <i>Pediococcus</i>       | <i>pentosaceus</i> ATCC25745                            | 1.83 | 242  | TransportDB |
| Bacteria | <i>Pediococcus</i>       | <i>pentosaceus</i> SL4                                  | 1.79 | 228  | TransportDB |
| Bacteria | <i>Pelodictyon</i>       | <i>phaeoclathratiforme</i> BU1                          | 3.02 | 179  | TransportDB |
| Bacteria | <i>Pandoraea</i>         | <i>pnomenusa</i> 3kgm                                   | 5.44 | 694  | TransportDB |
| Bacteria | <i>Pseudomonas</i>       | <i>poae</i> RE1114                                      | 5.51 | 605  | TransportDB |
| Bacteria | <i>Paenibacillus</i>     | <i>polymyxa</i> CR1                                     | 6.02 | 753  | TransportDB |
| Bacteria | <i>Paenibacillus</i>     | <i>polymyxa</i> E681                                    | 5.39 | 647  | TransportDB |
| Bacteria | <i>Paenibacillus</i>     | <i>polymyxa</i> M1                                      | 6.23 | 712  | TransportDB |
| Bacteria | <i>Paenibacillus</i>     | <i>polymyxa</i> SC2                                     | 6.24 | 708  | TransportDB |
| Bacteria | <i>Photobacterium</i>    | <i>profundum</i> SS9                                    | 6.4  | 660  | TransportDB |
| Bacteria | <i>Paludibacter</i>      | <i>propionigenes</i> WB4                                | 3.69 | 200  | TransportDB |
| Bacteria | <i>Propionibacterium</i> | <i>propionicum</i> F0230a                               | 3.45 | 418  | TransportDB |
| Bacteria | <i>Pelobacter</i>        | <i>propionicus</i> DSM2379                              | 4.24 | 332  | TransportDB |
| Bacteria | <i>Pseudomonas</i>       | <i>protegens</i> CHA0                                   | 6.87 | 781  | TransportDB |
| Bacteria | <i>Pseudomonas</i>       | <i>protegens</i> Pf5                                    | 7.07 | 780  | TransportDB |
| Bacteria | <i>Pseudomonas</i>       | <i>putida</i> BIRD1                                     | 5.73 | 665  | TransportDB |

|          |                           |                                      |      |      |             |
|----------|---------------------------|--------------------------------------|------|------|-------------|
| Bacteria | <i>Pseudomonas</i>        | <i>putida</i> DOT1E                  | 6.26 | 686  | TransportDB |
| Bacteria | <i>Pseudomonas</i>        | <i>putida</i> F1                     | 5.96 | 667  | TransportDB |
| Bacteria | <i>Pseudomonas</i>        | <i>putida</i> GB1                    | 6.08 | 711  | TransportDB |
| Bacteria | <i>Pseudomonas</i>        | <i>putida</i> H8234                  | 6.87 | 754  | TransportDB |
| Bacteria | <i>Pseudomonas</i>        | <i>putida</i> HB3267                 | 5.96 | 659  | TransportDB |
| Bacteria | <i>Pseudomonas</i>        | <i>putida</i> KT2440                 | 6.18 | 677  | TransportDB |
| Bacteria | <i>Pseudomonas</i>        | <i>putida</i> NBRC14164              | 6.16 | 721  | TransportDB |
| Bacteria | <i>Pseudomonas</i>        | <i>putida</i> ND6                    | 6.09 | 679  | TransportDB |
| Bacteria | <i>Pseudomonas</i>        | <i>putida</i> S16                    | 5.98 | 660  | TransportDB |
| Bacteria | <i>Pseudomonas</i>        | <i>putida</i> W619                   | 5.77 | 636  | TransportDB |
| Bacteria | <i>Pseudomonas</i>        | <i>resinovorans</i> NBRC106553       | 6.48 | 697  | TransportDB |
| Bacteria | <i>Prevotella</i>         | <i>ruminicola</i> 23                 | 3.62 | 166  | TransportDB |
| Bacteria | <i>Pedobacter</i>         | <i>saltans</i> DSM12145              | 4.64 | 227  | TransportDB |
| Bacteria | <i>Polynucleobacter</i>   | <i>sp</i> QLW-P1DMWA-1               | 2.16 | 227  | TransportDB |
| Bacteria | <i>Pantoea</i>            | <i>sAt9b</i>                         | 6.31 | 1028 | TransportDB |
| Bacteria | <i>Prochlorococcus</i>    | <i>sCC9311</i>                       | 2.61 | 198  | TransportDB |
| Bacteria | <i>Prochlorococcus</i>    | <i>sCC9605</i> (oligotrophic)        | 2.51 | 174  | TransportDB |
| Bacteria | <i>Prochlorococcus</i>    | <i>sCC9902</i> (coastal)             | 2.23 | 158  | TransportDB |
| Bacteria | <i>Psychromonas</i>       | <i>sCNPT3</i>                        | 3.05 | 329  | TransportDB |
| Bacteria | <i>Pseudovibrio</i>       | <i>sFOBEG1</i>                       | 5.92 | 765  | TransportDB |
| Bacteria | <i>Psychrobacter</i>      | <i>sG</i>                            | 3.11 | 274  | TransportDB |
| Bacteria | <i>Paenibacillus</i>      | <i>sJDR2</i>                         | 7.18 | 1031 | TransportDB |
| Bacteria | <i>Polaromonas</i>        | <i>sJS666</i>                        | 5.9  | 765  | TransportDB |
| Bacteria | <i>Polaribacter</i>       | <i>sMED152</i>                       | 2.96 | 169  | TransportDB |
| Bacteria | <i>Pseudogulbenkiania</i> | <i>sNH8B</i>                         | 4.33 | 464  | TransportDB |
| Bacteria | <i>Prevotella</i>         | <i>soraltaxon299</i> str F0039       | 2.48 | 116  | TransportDB |
| Bacteria | <i>Pleurocapsa</i>        | <i>sPCC7327</i>                      | 4.99 | 334  | TransportDB |
| Bacteria | <i>Pseudanabaena</i>      | <i>sPCC7367</i>                      | 4.89 | 276  | TransportDB |
| Bacteria | <i>Psychrobacter</i>      | <i>sPRwf1</i>                        | 3.0  | 254  | TransportDB |
| Bacteria | <i>Pandoraea</i>          | <i>sRB44</i>                         | 5.39 | 689  | TransportDB |
| Bacteria | <i>Pectobacterium</i>     | <i>sSCC3193</i>                      | 5.16 | 700  | TransportDB |
| Bacteria | <i>Pseudoalteromonas</i>  | <i>sSM9913</i>                       | 4.04 | 303  | TransportDB |
| Bacteria | <i>Pusillimonas</i>       | <i>sT77</i>                          | 3.92 | 592  | TransportDB |
| Bacteria | <i>Pseudomonas</i>        | <i>sTKP</i>                          | 7.01 | 851  | TransportDB |
| Bacteria | <i>Pseudomonas</i>        | <i>sUW4</i>                          | 6.18 | 695  | TransportDB |
| Bacteria | <i>Pseudomonas</i>        | <i>sVLB120</i>                       | 5.97 | 618  | TransportDB |
| Bacteria | <i>Prochlorococcus</i>    | <i>sWH 7803</i>                      | 2.37 | 213  | TransportDB |
| Bacteria | <i>Prochlorococcus</i>    | <i>sWH8102</i>                       | 2.43 | 180  | TransportDB |
| Bacteria | <i>Paenibacillus</i>      | <i>sY412MC10</i>                     | 7.12 | 1095 | TransportDB |
| Bacteria | <i>Pseudoxanthomonas</i>  | <i>spadix</i> BDa59                  | 3.45 | 254  | TransportDB |
| Bacteria | <i>Pirellula</i>          | <i>staleyii</i> DSM6068              | 6.2  | 238  | TransportDB |
| Bacteria | <i>Plautia</i>            | <i>stali</i> symbiont                | 4.09 | 762  | TransportDB |
| Bacteria | <i>Providencia</i>        | <i>stuartii</i> MRSN2154             | 4.4  | 484  | TransportDB |
| Bacteria | <i>Pseudomonas</i>        | <i>stutzeri</i> A1501                | 4.57 | 490  | TransportDB |
| Bacteria | <i>Pseudomonas</i>        | <i>stutzeri</i><br>ATCC17588LMG11199 | 4.55 | 488  | TransportDB |
| Bacteria | <i>Pseudomonas</i>        | <i>stutzeri</i> CCUG29243            | 4.71 | 495  | TransportDB |
| Bacteria | <i>Pseudomonas</i>        | <i>stutzeri</i> DSM10701             | 4.17 | 447  | TransportDB |

|          |                          |                                           |      |      |             |
|----------|--------------------------|-------------------------------------------|------|------|-------------|
| Bacteria | <i>Pseudomonas</i>       | <i>stutzeri</i> DSM4166                   | 4.69 | 536  | TransportDB |
| Bacteria | <i>Pseudomonas</i>       | <i>stutzeri</i> RCH2                      | 4.6  | 490  | TransportDB |
| Bacteria | <i>Pseudoxanthomonas</i> | <i>suwonensis</i> 111                     | 3.42 | 259  | TransportDB |
| Bacteria | <i>Pseudomonas</i>       | <i>syringae pvphaseolicola</i><br>1448A   | 6.11 | 670  | TransportDB |
| Bacteria | <i>Pseudomonas</i>       | <i>syringae pvsyringae</i> B728a          | 6.09 | 668  | TransportDB |
| Bacteria | <i>Pseudomonas</i>       | <i>syringae pvtomato</i> str DC3000       | 6.54 | 673  | TransportDB |
| Bacteria | <i>Paenibacillus</i>     | <i>terrae</i> HPL003                      | 6.08 | 788  | TransportDB |
| Bacteria | <i>Pelotomaculum</i>     | <i>thermopropionicum</i> SI               | 3.03 | 222  | TransportDB |
| Bacteria | <i>Psychroflexus</i>     | <i>torquis</i> ATCC700755                 | 4.32 | 212  | TransportDB |
| Bacteria | <i>Pantoea</i>           | <i>vagans</i> C91                         | 4.89 | 698  | TransportDB |
| Bacteria | <i>Pectobacterium</i>    | <i>wasabiae</i> WPP163                    | 5.06 | 675  | TransportDB |
| Bacteria | <i>Phenylobacterium</i>  | <i>zucineum</i> HLK1                      | 4.38 | 303  | TransportDB |
| Bacteria | <i>Rickettsia</i>        | <i>africae</i> ESF5                       | 1.29 | 104  | TransportDB |
| Bacteria | <i>Rickettsia</i>        | <i>akari</i> str Hartford                 | 1.23 | 106  | TransportDB |
| Bacteria | <i>Ruminococcus</i>      | <i>albus</i> 7                            | 4.48 | 236  | TransportDB |
| Bacteria | <i>Riemerella</i>        | <i>anatipestifer</i><br>ATCC11845DSM15868 | 2.16 | 112  | TransportDB |
| Bacteria | <i>Riemerella</i>        | <i>anatipestifer</i> RACH1                | 2.31 | 111  | TransportDB |
| Bacteria | <i>Riemerella</i>        | <i>anatipestifer</i> RACH2                | 2.17 | 111  | TransportDB |
| Bacteria | <i>Riemerella</i>        | <i>anatipestifer</i> RAGD                 | 2.17 | 108  | TransportDB |
| Bacteria | <i>Rahnella</i>          | <i>aquatilis</i> CIP7865ATCC33071         | 5.45 | 820  | TransportDB |
| Bacteria | <i>Rahnella</i>          | <i>aquatilis</i> HX2                      | 5.66 | 858  | TransportDB |
| Bacteria | <i>Rickettsia</i>        | <i>australis</i> str Cutlack              | 1.32 | 112  | TransportDB |
| Bacteria | <i>Rhodopirellula</i>    | <i>baltica</i> SH1                        | 7.15 | 308  | TransportDB |
| Bacteria | <i>Rickettsia</i>        | <i>bellii</i> OSU85389                    | 1.53 | 118  | TransportDB |
| Bacteria | <i>Rickettsia</i>        | <i>bellii</i> RML369C                     | 1.52 | 134  | TransportDB |
| Bacteria | <i>Robiginitalea</i>     | <i>biformata</i> HTCC2501                 | 3.53 | 202  | TransportDB |
| Bacteria | <i>Ruminococcus</i>      | <i>bromii</i> L263                        | 2.25 | 147  | TransportDB |
| Bacteria | <i>Rickettsia</i>        | <i>canadensis</i> str CA410               | 1.15 | 102  | TransportDB |
| Bacteria | <i>Rickettsia</i>        | <i>canadensis</i> str McKiel              | 1.16 | 97   | TransportDB |
| Bacteria | <i>Rhodobacter</i>       | <i>capsulatus</i> SB1003                  | 3.87 | 468  | TransportDB |
| Bacteria | <i>Roseiflexus</i>       | <i>castenholzii</i> DSM13941              | 5.72 | 397  | TransportDB |
| Bacteria | <i>Rhodospirillum</i>    | <i>centenum</i> SW                        | 4.36 | 339  | TransportDB |
| Bacteria | <i>Ruminococcus</i>      | <i>champanellensis</i> 18P13              | 2.57 | 159  | TransportDB |
| Bacteria | <i>Rickettsia</i>        | <i>conorii</i> str Malish7                | 1.27 | 125  | TransportDB |
| Bacteria | <i>Roseobacter</i>       | <i>denitrificans</i> OCh114               | 4.33 | 579  | TransportDB |
| Bacteria | <i>Rothia</i>            | <i>dentocariosa</i> ATCC17931             | 2.51 | 222  | TransportDB |
| Bacteria | <i>Rhodococcus</i>       | <i>equi</i> 103S                          | 5.04 | 468  | TransportDB |
| Bacteria | <i>Rhodococcus</i>       | <i>erythropolis</i> CCM2595               | 6.37 | 706  | TransportDB |
| Bacteria | <i>Rhodococcus</i>       | <i>erythropolis</i> PR4                   | 6.9  | 718  | TransportDB |
| Bacteria | <i>Rhizobium</i>         | <i>etli</i> <i>bvminosae</i> str Mim1     | 7.2  | 1049 | TransportDB |
| Bacteria | <i>Rhizobium</i>         | <i>etli</i> CFN42                         | 6.53 | 893  | TransportDB |
| Bacteria | <i>Rhizobium</i>         | <i>etli</i> CIAT652                       | 6.45 | 875  | TransportDB |
| Bacteria | <i>Ralstonia</i>         | <i>eutropha</i> H16                       | 7.42 | 839  | TransportDB |
| Bacteria | <i>Ralstonia</i>         | <i>eutropha</i> JMP134                    | 7.26 | 791  | TransportDB |
| Bacteria | <i>Rickettsia</i>        | <i>felis</i> URRWXC12                     | 1.59 | 132  | TransportDB |

|          |                         |                                            |      |      |             |
|----------|-------------------------|--------------------------------------------|------|------|-------------|
| Bacteria | <i>Rhodoferax</i>       | <i>ferrireducens</i> T118                  | 4.97 | 566  | TransportDB |
| Bacteria | <i>Rubrivivax</i>       | <i>gelatinosus</i> IL144                   | 5.04 | 482  | TransportDB |
| Bacteria | <i>Rickettsia</i>       | <i>heilongjiangensis</i> 054               | 1.28 | 120  | TransportDB |
| Bacteria | <i>Roseburia</i>        | <i>hominis</i> A2183                       | 3.59 | 376  | TransportDB |
| Bacteria | <i>Roseburia</i>        | <i>intestinalis</i> M501                   | 4.14 | 379  | TransportDB |
| Bacteria | <i>Roseburia</i>        | <i>intestinalis</i> XB6B4                  | 4.29 | 380  | TransportDB |
| Bacteria | <i>Rickettsia</i>       | <i>japonica</i> YH                         | 1.28 | 102  | TransportDB |
| Bacteria | <i>Rhodococcus</i>      | <i>jostii</i> RHA1                         | 9.7  | 804  | TransportDB |
| Bacteria | <i>Rhizobium</i>        | <i>leguminosarum bvtrifolii</i><br>WSM1325 | 7.42 | 1087 | TransportDB |
| Bacteria | <i>Rhizobium</i>        | <i>leguminosarum bvtrifolii</i><br>WSM2304 | 6.87 | 1030 | TransportDB |
| Bacteria | <i>Rhizobium</i>        | <i>leguminosarum bvviciae</i> 3841         | 7.75 | 1169 | TransportDB |
| Bacteria | <i>Roseobacter</i>      | <i>litoralis</i> Och149                    | 4.75 | 675  | TransportDB |
| Bacteria | <i>Rhodothermus</i>     | <i>marinus</i> DSM4252                     | 3.39 | 208  | TransportDB |
| Bacteria | <i>Rhodothermus</i>     | <i>marinus</i> SG05JP17172                 | 3.33 | 197  | TransportDB |
| Bacteria | <i>Rickettsia</i>       | <i>massiliae</i> MTU5                      | 1.38 | 104  | TransportDB |
| Bacteria | <i>Rickettsia</i>       | <i>massiliae</i> str AZT80                 | 1.28 | 104  | TransportDB |
| Bacteria | <i>Rickettsia</i>       | <i>montanensis</i> str OSU85930            | 1.28 | 113  | TransportDB |
| Bacteria | <i>Rothia</i>           | <i>mucilaginosa</i> DY18                   | 2.26 | 206  | TransportDB |
| Bacteria | <i>Rhodococcus</i>      | <i>opacus</i> B4                           | 8.83 | 773  | TransportDB |
| Bacteria | <i>Raoultella</i>       | <i>ornithinolytica</i> B6                  | 5.4  | 929  | TransportDB |
| Bacteria | <i>Rhodopseudomonas</i> | <i>palustris</i> BisA53                    | 5.51 | 486  | TransportDB |
| Bacteria | <i>Rhodopseudomonas</i> | <i>palustris</i> BisB18                    | 5.51 | 541  | TransportDB |
| Bacteria | <i>Rhodopseudomonas</i> | <i>palustris</i> BisB5                     | 4.89 | 525  | TransportDB |
| Bacteria | <i>Rhodopseudomonas</i> | <i>palustris</i> CGA009                    | 5.47 | 629  | TransportDB |
| Bacteria | <i>Rhodopseudomonas</i> | <i>palustris</i> DX1                       | 5.4  | 600  | TransportDB |
| Bacteria | <i>Rhodopseudomonas</i> | <i>palustris</i> HaA2                      | 5.33 | 596  | TransportDB |
| Bacteria | <i>Rhodopseudomonas</i> | <i>palustris</i> TIE1                      | 5.74 | 641  | TransportDB |
| Bacteria | <i>Rickettsia</i>       | <i>parkeri</i> str Portsmouth              | 1.3  | 118  | TransportDB |
| Bacteria | <i>Rickettsia</i>       | <i>peacockii</i> str Rustic                | 1.31 | 96   | TransportDB |
| Bacteria | <i>Rickettsia</i>       | <i>philipii</i> str 364D                   | 1.29 | 120  | TransportDB |
| Bacteria | <i>Rhodospirillum</i>   | <i>photometricum</i> DSM122                | 3.88 | 371  | TransportDB |
| Bacteria | <i>Ralstonia</i>        | <i>pickettii</i> 12D                       | 5.69 | 560  | TransportDB |
| Bacteria | <i>Ralstonia</i>        | <i>pickettii</i> 12J                       | 5.33 | 561  | TransportDB |
| Bacteria | <i>Ralstonia</i>        | <i>pickettii</i> DTP0602                   | 8.13 | 936  | TransportDB |
| Bacteria | <i>Ruegeria</i>         | <i>pomeroyi</i> DSS3                       | 4.6  | 602  | TransportDB |
| Bacteria | <i>Rickettsia</i>       | <i>prowazekii</i> str Breinl               | 1.11 | 99   | TransportDB |
| Bacteria | <i>Rickettsia</i>       | <i>prowazekii</i> str BuV67CWPP            | 1.11 | 97   | TransportDB |
| Bacteria | <i>Rickettsia</i>       | <i>prowazekii</i> str Chernikova           | 1.11 | 98   | TransportDB |
| Bacteria | <i>Rickettsia</i>       | <i>prowazekii</i> str Dachau               | 1.11 | 96   | TransportDB |
| Bacteria | <i>Rickettsia</i>       | <i>prowazekii</i> str GvV257               | 1.11 | 96   | TransportDB |
| Bacteria | <i>Rickettsia</i>       | <i>prowazekii</i> str Katsinyian           | 1.11 | 97   | TransportDB |
| Bacteria | <i>Rickettsia</i>       | <i>prowazekii</i> str MadridE              | 1.11 | 98   | TransportDB |
| Bacteria | <i>Rickettsia</i>       | <i>prowazekii</i> str NMRCMadridE          | 1.11 | 99   | TransportDB |
| Bacteria | <i>Rickettsia</i>       | <i>prowazekii</i> str Rp22                 | 1.11 | 98   | TransportDB |
| Bacteria | <i>Rickettsia</i>       | <i>prowazekii</i> str RpGvF24              | 1.11 | 97   | TransportDB |

|          |                       |                                       |      |     |             |
|----------|-----------------------|---------------------------------------|------|-----|-------------|
| Bacteria | <i>Rhodococcus</i>    | <i>pyridinivorans</i> SB3094          | 5.59 | 464 | TransportDB |
| Bacteria | <i>Rickettsia</i>     | <i>rhipicephali</i> str 37female6CWPP | 1.31 | 115 | TransportDB |
| Bacteria | <i>Rickettsia</i>     | <i>rickettsii</i> str Arizona         | 1.27 | 117 | TransportDB |
| Bacteria | <i>Rickettsia</i>     | <i>rickettsii</i> str Brazil          | 1.26 | 116 | TransportDB |
| Bacteria | <i>Rickettsia</i>     | <i>rickettsii</i> str Colombia        | 1.27 | 118 | TransportDB |
| Bacteria | <i>Rickettsia</i>     | <i>rickettsii</i> str Hauke           | 1.27 | 118 | TransportDB |
| Bacteria | <i>Rickettsia</i>     | <i>rickettsii</i> str Hino            | 1.27 | 118 | TransportDB |
| Bacteria | <i>Rickettsia</i>     | <i>rickettsii</i> str Hlp2            | 1.27 | 113 | TransportDB |
| Bacteria | <i>Rickettsia</i>     | <i>rickettsii</i> str Iowa            | 1.27 | 112 | TransportDB |
| Bacteria | <i>Rickettsia</i>     | <i>rickettsii</i> str Sheila Smith    | 1.26 | 107 | TransportDB |
| Bacteria | <i>Rhodospirillum</i> | <i>rubrum</i> ATCC11170               | 4.41 | 498 | TransportDB |
| Bacteria | <i>Rhodospirillum</i> | <i>rubrum</i> F11                     | 4.35 | 496 | TransportDB |
| Bacteria | <i>Renibacterium</i>  | <i>salmoninarum</i> ATCC33209         | 3.16 | 403 | TransportDB |
| Bacteria | <i>Runella</i>        | <i>slithyformis</i> DSM19594          | 6.92 | 302 | TransportDB |
| Bacteria | <i>Rickettsia</i>     | <i>slovaca</i> 13B                    | 1.28 | 100 | TransportDB |
| Bacteria | <i>Rickettsia</i>     | <i>slovaca</i> str DCWPP              | 1.28 | 123 | TransportDB |
| Bacteria | <i>Ralstonia</i>      | <i>solanacearum</i> CFBP2957          | 3.42 | 313 | TransportDB |
| Bacteria | <i>Ralstonia</i>      | <i>solanacearum</i> CMR15             | 5.59 | 499 | TransportDB |
| Bacteria | <i>Ralstonia</i>      | <i>solanacearum</i> FQY_4             | 5.81 | 508 | TransportDB |
| Bacteria | <i>Ralstonia</i>      | <i>solanacearum</i> GMI1000           | 5.81 | 511 | TransportDB |
| Bacteria | <i>Ralstonia</i>      | <i>solanacearum</i> Po82              | 5.43 | 501 | TransportDB |
| Bacteria | <i>Ralstonia</i>      | <i>solanacearum</i> PSI07             | 5.61 | 515 | TransportDB |
| Bacteria | <i>Rhodococcus</i>    | <i>sp RHA1</i>                        | 7.8  | 834 | TransportDB |
| Bacteria | <i>Rhodanobacter</i>  | <i>s2APBS1</i>                        | 4.23 | 301 | TransportDB |
| Bacteria | <i>Rhizobium</i>      | <i>sIRBG74</i>                        | 5.46 | 917 | TransportDB |
| Bacteria | <i>Rivularia</i>      | <i>sPCC7116</i>                       | 8.73 | 466 | TransportDB |
| Bacteria | <i>Roseiflexus</i>    | <i>sRS1</i>                           | 5.8  | 391 | TransportDB |
| Bacteria | <i>Ruminococcus</i>   | <i>sSR15</i>                          | 3.55 | 350 | TransportDB |
| Bacteria | <i>Ruegeria</i>       | <i>sTM1040</i>                        | 4.15 | 502 | TransportDB |
| Bacteria | <i>Rahnella</i>       | <i>sY9602</i>                         | 5.61 | 859 | TransportDB |
| Bacteria | <i>Rhodobacter</i>    | <i>sphaeroides</i> 241                | 4.6  | 575 | TransportDB |
| Bacteria | <i>Rhodobacter</i>    | <i>sphaeroides</i> ATCC17025          | 4.56 | 526 | TransportDB |
| Bacteria | <i>Rhodobacter</i>    | <i>sphaeroides</i> ATCC17029          | 4.49 | 592 | TransportDB |
| Bacteria | <i>Rhodobacter</i>    | <i>sphaeroides</i> KD131              | 4.71 | 629 | TransportDB |
| Bacteria | <i>Ramlibacter</i>    | <i>tataouinensis</i> TTB310           | 4.07 | 480 | TransportDB |
| Bacteria | <i>Rhizobium</i>      | <i>tropici</i> CIAT899                | 6.69 | 964 | TransportDB |
| Bacteria | <i>Rickettsia</i>     | <i>typhi</i> str B9991CWPP            | 1.11 | 97  | TransportDB |
| Bacteria | <i>Rickettsia</i>     | <i>typhi</i> str TH1527               | 1.11 | 97  | TransportDB |
| Bacteria | <i>Rickettsia</i>     | <i>typhi</i> str Wilmington           | 1.11 | 96  | TransportDB |
| Bacteria | <i>Rhodomicrobium</i> | <i>vanniellii</i> ATCC17100           | 4.01 | 322 | TransportDB |
| Bacteria | <i>Rubrobacter</i>    | <i>xylanophilus</i> DSM9941           | 3.23 | 361 | TransportDB |
| Bacteria | <i>Singulisphaera</i> | <i>acidiphila</i> DSM18658            | 9.76 | 355 | TransportDB |
| Bacteria | <i>Syntrophus</i>     | <i>aciditrophicus</i> SB              | 3.18 | 244 | TransportDB |
| Bacteria | <i>Sulfobacillus</i>  | <i>acidophilus</i> DSM10332           | 3.56 | 333 | TransportDB |
| Bacteria | <i>Sulfobacillus</i>  | <i>acidophilus</i> TPY                | 3.55 | 342 | TransportDB |
| Bacteria | <i>Spirochaeta</i>    | <i>africana</i> DSM8902               | 3.29 | 311 | TransportDB |
| Bacteria | <i>Streptococcus</i>  | <i>agalactiae</i>                     | 1.84 | 246 | TransportDB |

|          |                       |                                                 |       |     |             |
|----------|-----------------------|-------------------------------------------------|-------|-----|-------------|
| Bacteria | <i>Streptococcus</i>  | <i>agalactiae</i> 09mas018883                   | 2.14  | 301 | TransportDB |
| Bacteria | <i>Streptococcus</i>  | <i>agalactiae</i> 2603VR                        | 2.16  | 299 | TransportDB |
| Bacteria | <i>Streptococcus</i>  | <i>agalactiae</i> A909                          | 2.13  | 301 | TransportDB |
| Bacteria | <i>Streptococcus</i>  | <i>agalactiae</i> GD201008001                   | 2.06  | 301 | TransportDB |
| Bacteria | <i>Streptococcus</i>  | <i>agalactiae</i> ILRI005                       | 2.11  | 306 | TransportDB |
| Bacteria | <i>Streptococcus</i>  | <i>agalactiae</i> ILRI112                       | 2.03  | 322 | TransportDB |
| Bacteria | <i>Streptococcus</i>  | <i>agalactiae</i> NEM316                        | 2.21  | 311 | TransportDB |
| Bacteria | <i>Streptococcus</i>  | <i>agalactiae</i> SA2006                        | 1.82  | 288 | TransportDB |
| Bacteria | <i>Simidiua</i>       | <i>agarivorans</i> SA1DSM21679                  | 4.3   | 279 | TransportDB |
| Bacteria | <i>Sphingopyxis</i>   | <i>alaskensis</i> RB2256                        | 3.37  | 216 | TransportDB |
| Bacteria | <i>Streptomyces</i>   | <i>albus</i> J1074                              | 6.84  | 632 | TransportDB |
| Bacteria | <i>Shewanella</i>     | <i>amazonensis</i> SB2B                         | 4.31  | 326 | TransportDB |
| Bacteria | <i>Streptococcus</i>  | <i>anginosus</i> C1051                          | 1.91  | 252 | TransportDB |
| Bacteria | <i>Streptococcus</i>  | <i>anginosus</i> C238                           | 2.23  | 272 | TransportDB |
| Bacteria | <i>Spiroplasma</i>    | <i>apis</i> B31                                 | 1.16  | 113 | TransportDB |
| Bacteria | <i>Stigmatella</i>    | <i>aurantiaca</i> DW431                         | 10.26 | 476 | TransportDB |
| Bacteria | <i>Staphylococcus</i> | <i>aureus</i> 0402981                           | 2.82  | 353 | TransportDB |
| Bacteria | <i>Staphylococcus</i> | <i>aureus</i> 08BA02176                         | 2.78  | 344 | TransportDB |
| Bacteria | <i>Staphylococcus</i> | <i>aureus aureus</i> MRSA USA300<br>FPR3757     | 2.87  | 359 | TransportDB |
| Bacteria | <i>Staphylococcus</i> | <i>aureus</i> Bmb9393                           | 2.98  | 349 | TransportDB |
| Bacteria | <i>Staphylococcus</i> | <i>aureus</i> CA347                             | 2.88  | 358 | TransportDB |
| Bacteria | <i>Staphylococcus</i> | <i>aureus</i> M1                                | 2.89  | 353 | TransportDB |
| Bacteria | <i>Staphylococcus</i> | <i>aureus</i> RF122                             | 2.74  | 347 | TransportDB |
| Bacteria | <i>Staphylococcus</i> | <i>aureus</i> subsp <i>aureus</i> 1181997       | 2.87  | 348 | TransportDB |
| Bacteria | <i>Staphylococcus</i> | <i>aureus</i> subsp <i>aureus</i> 552053        | 2.78  | 356 | TransportDB |
| Bacteria | <i>Staphylococcus</i> | <i>aureus</i> subsp <i>aureus</i> 6850          | 2.74  | 344 | TransportDB |
| Bacteria | <i>Staphylococcus</i> | <i>aureus</i> subsp <i>aureus</i> 71193         | 2.72  | 345 | TransportDB |
| Bacteria | <i>Staphylococcus</i> | <i>aureus</i> subsp <i>aureus</i> CN1           | 2.76  | 351 | TransportDB |
| Bacteria | <i>Staphylococcus</i> | <i>aureus</i> subsp <i>aureus</i> COL           | 2.81  | 347 | TransportDB |
| Bacteria | <i>Staphylococcus</i> | <i>aureus</i> subsp <i>aureus</i> ECTR2         | 2.76  | 351 | TransportDB |
| Bacteria | <i>Staphylococcus</i> | <i>aureus</i> subsp <i>aureus</i> ED133         | 2.83  | 347 | TransportDB |
| Bacteria | <i>Staphylococcus</i> | <i>aureus</i> subsp <i>aureus</i> ED98          | 2.85  | 352 | TransportDB |
| Bacteria | <i>Staphylococcus</i> | <i>aureus</i> subsp <i>aureus</i><br>HO50960412 | 2.83  | 346 | TransportDB |
| Bacteria | <i>Staphylococcus</i> | <i>aureus</i> subsp <i>aureus</i> JH1           | 2.94  | 354 | TransportDB |
| Bacteria | <i>Staphylococcus</i> | <i>aureus</i> subsp <i>aureus</i> JH9           | 2.94  | 355 | TransportDB |
| Bacteria | <i>Staphylococcus</i> | <i>aureus</i> subsp <i>aureus</i><br>JKD6159    | 2.83  | 350 | TransportDB |
| Bacteria | <i>Staphylococcus</i> | <i>aureus</i> subsp <i>aureus</i> LGA251        | 2.75  | 347 | TransportDB |
| Bacteria | <i>Staphylococcus</i> | <i>aureus</i> subsp <i>aureus</i> M013          | 2.79  | 351 | TransportDB |
| Bacteria | <i>Staphylococcus</i> | <i>aureus</i> subsp <i>aureus</i><br>MRSA252    | 2.9   | 217 | TransportDB |
| Bacteria | <i>Staphylococcus</i> | <i>aureus</i> subsp <i>aureus</i><br>MSHR1132   | 2.79  | 353 | TransportDB |
| Bacteria | <i>Staphylococcus</i> | <i>aureus</i> subsp <i>aureus</i><br>MSSA476    | 2.82  | 356 | TransportDB |
| Bacteria | <i>Staphylococcus</i> | <i>aureus</i> subsp <i>aureus</i> Mu3           | 2.88  | 358 | TransportDB |

|          |                             |                                                     |       |      |             |
|----------|-----------------------------|-----------------------------------------------------|-------|------|-------------|
| Bacteria | <i>Staphylococcus</i>       | <i>aureus</i> subsp <i>aureus</i> Mu50              | 2.9   | 359  | TransportDB |
| Bacteria | <i>Staphylococcus</i>       | <i>aureus</i> subsp <i>aureus</i> MW2               | 2.82  | 352  | TransportDB |
| Bacteria | <i>Staphylococcus</i>       | <i>aureus</i> subsp <i>aureus</i> N315              | 2.84  | 357  | TransportDB |
| Bacteria | <i>Staphylococcus</i>       | <i>aureus</i> subsp <i>aureus</i><br>NCTC8325       | 2.82  | 350  | TransportDB |
| Bacteria | <i>Staphylococcus</i>       | <i>aureus</i> subsp <i>aureus</i> SA40              | 2.73  | 345  | TransportDB |
| Bacteria | <i>Staphylococcus</i>       | <i>aureus</i> subsp <i>aureus</i> SA957             | 2.79  | 347  | TransportDB |
| Bacteria | <i>Staphylococcus</i>       | <i>aureus</i> subsp <i>aureus</i> ST228             | 2.78  | 330  | TransportDB |
| Bacteria | <i>Staphylococcus</i>       | <i>aureus</i> subsp <i>aureus</i> ST398             | 2.89  | 350  | TransportDB |
| Bacteria | <i>Staphylococcus</i>       | <i>aureus</i> subsp <i>aureus</i> str<br>JKD6008    | 2.92  | 347  | TransportDB |
| Bacteria | <i>Staphylococcus</i>       | <i>aureus</i> subsp <i>aureus</i> str<br>Newman     | 2.88  | 348  | TransportDB |
| Bacteria | <i>Staphylococcus</i>       | <i>aureus</i> subsp <i>aureus</i> T0131             | 2.91  | 352  | TransportDB |
| Bacteria | <i>Staphylococcus</i>       | <i>aureus</i> subsp <i>aureus</i> TCH60             | 2.83  | 356  | TransportDB |
| Bacteria | <i>Staphylococcus</i>       | <i>aureus</i> subsp <i>aureus</i> TW20              | 3.08  | 357  | TransportDB |
| Bacteria | <i>Staphylococcus</i>       | <i>aureus</i> subsp <i>aureus</i><br>USA300_FPR3757 | 2.92  | 362  | TransportDB |
| Bacteria | <i>Staphylococcus</i>       | <i>aureus</i> subsp <i>aureus</i><br>USA300_TCH1516 | 2.9   | 348  | TransportDB |
| Bacteria | <i>Staphylococcus</i>       | <i>aureus</i> subsp <i>aureus</i> VC40              | 2.69  | 350  | TransportDB |
| Bacteria | <i>Staphylococcus</i>       | <i>aureus</i> subsp <i>aureus</i> Z172              | 3.02  | 359  | TransportDB |
| Bacteria | <i>Sulfurimonas</i>         | <i>autotrophica</i> DSM16294                        | 2.15  | 166  | TransportDB |
| Bacteria | <i>Streptomyces</i>         | <i>avermitilis</i> MA4680                           | 9.12  | 766  | TransportDB |
| Bacteria | <i>Sulfurihydrogenibium</i> | <i>azorense</i> AzFu1                               | 1.64  | 112  | TransportDB |
| Bacteria | <i>Synergistetes</i>        | <i>bacterium</i> SGP1                               | 2.73  | 239  | TransportDB |
| Bacteria | <i>Shewanella</i>           | <i>baltica</i> BA175                                | 5.2   | 410  | TransportDB |
| Bacteria | <i>Shewanella</i>           | <i>baltica</i> OS117                                | 5.53  | 403  | TransportDB |
| Bacteria | <i>Shewanella</i>           | <i>baltica</i> OS155                                | 5.34  | 403  | TransportDB |
| Bacteria | <i>Shewanella</i>           | <i>baltica</i> OS185                                | 5.31  | 401  | TransportDB |
| Bacteria | <i>Shewanella</i>           | <i>baltica</i> OS195                                | 5.55  | 420  | TransportDB |
| Bacteria | <i>Shewanella</i>           | <i>baltica</i> OS223                                | 5.36  | 404  | TransportDB |
| Bacteria | <i>Shewanella</i>           | <i>baltica</i> OS678                                | 5.37  | 410  | TransportDB |
| Bacteria | <i>Sulfurospirillum</i>     | <i>barnesii</i> SES3                                | 2.51  | 277  | TransportDB |
| Bacteria | <i>Streptomyces</i>         | <i>bingchenggensis</i> BCW1                         | 11.94 | 1010 | TransportDB |
| Bacteria | <i>Shimwellia</i>           | <i>blattae</i><br>DSM4481NBRC105725                 | 4.16  | 542  | TransportDB |
| Bacteria | <i>Salmonella</i>           | <i>bongori</i> N26808                               | 4.77  | 596  | TransportDB |
| Bacteria | <i>Salmonella</i>           | <i>bongori</i> NCTC12419                            | 4.46  | 577  | TransportDB |
| Bacteria | <i>Shigella</i>             | <i>boydii</i> CDC308394                             | 4.87  | 498  | TransportDB |
| Bacteria | <i>Shigella</i>             | <i>boydii</i> Sb227                                 | 4.65  | 496  | TransportDB |
| Bacteria | <i>Spirochaeta</i>          | <i>caldaria</i> DSM7334                             | 3.24  | 357  | TransportDB |
| Bacteria | <i>Solitalea</i>            | <i>canadensis</i> DSM3403                           | 5.2   | 248  | TransportDB |
| Bacteria | <i>Staphylococcus</i>       | <i>carneus</i> subsp <i>carneus</i><br>TM300        | 2.57  | 345  | TransportDB |
| Bacteria | <i>Streptomyces</i>         | <i>cattleya</i> NRRL8057DSM46488                    | 8.09  | 570  | TransportDB |
| Bacteria | <i>Sorangium</i>            | <i>cellulosum</i> So01572                           | 14.78 | 541  | TransportDB |
| Bacteria | <i>Sorangium</i>            | <i>cellulosum</i> Soce56                            | 13.03 | 468  | TransportDB |

|          |                         |                                                                 |      |     |             |
|----------|-------------------------|-----------------------------------------------------------------|------|-----|-------------|
| Bacteria | <i>Sphingobium</i>      | <i>chlorophenicum</i> L1                                        | 4.57 | 248 | TransportDB |
| Bacteria | <i>Spiroplasma</i>      | <i>chrysopicola</i> DF1                                         | 1.12 | 107 | TransportDB |
| Bacteria | <i>Sphaerochaeta</i>    | <i>coccoides</i> DSM17374                                       | 2.23 | 302 | TransportDB |
| Bacteria | <i>Streptomyces</i>     | <i>coelicolor</i> A32                                           | 9.05 | 798 | TransportDB |
| Bacteria | <i>Streptomyces</i>     | <i>collinus</i> Tu365                                           | 8.38 | 646 | TransportDB |
| Bacteria | <i>Streptococcus</i>    | <i>constellatus</i> subsp pharyngis C1050                       | 1.99 | 244 | TransportDB |
| Bacteria | <i>Streptococcus</i>    | <i>constellatus</i> subsp pharyngis C232                        | 1.94 | 240 | TransportDB |
| Bacteria | <i>Streptococcus</i>    | <i>constellatus</i> subsp pharyngis C818                        | 1.94 | 239 | TransportDB |
| Bacteria | <i>Stanieria</i>        | <i>cyanosphaera</i> PCC7437                                     | 5.54 | 340 | TransportDB |
| Bacteria | <i>Streptomyces</i>     | <i>davawensis</i> JCM4913                                       | 9.56 | 816 | TransportDB |
| Bacteria | <i>Saccharophagus</i>   | <i>degradans</i> 240                                            | 5.06 | 287 | TransportDB |
| Bacteria | <i>Sulfurospirillum</i> | <i>deleyianum</i> DSM6946                                       | 2.31 | 227 | TransportDB |
| Bacteria | <i>Sulfurimonas</i>     | <i>denitrificans</i> DSM1251                                    | 2.2  | 169 | TransportDB |
| Bacteria | <i>Shewanella</i>       | <i>denitrificans</i> OS217                                      | 4.55 | 295 | TransportDB |
| Bacteria | <i>Sulfuricella</i>     | <i>denitrificans</i> skB26                                      | 3.22 | 278 | TransportDB |
| Bacteria | <i>Spiroplasma</i>      | <i>diminutum</i> CUAS1                                          | 0.95 | 90  | TransportDB |
| Bacteria | <i>Shigella</i>         | <i>dysenteriae</i> 1617                                         | 4.48 | 617 | TransportDB |
| Bacteria | <i>Shigella</i>         | <i>dysenteriae</i> Sd197                                        | 4.56 | 484 | TransportDB |
| Bacteria | <i>Streptococcus</i>    | <i>dysgalactiae</i> subsp equisimilis 167                       | 2.08 | 326 | TransportDB |
| Bacteria | <i>Streptococcus</i>    | <i>dysgalactiae</i> subsp equisimilis AC2713                    | 2.18 | 307 | TransportDB |
| Bacteria | <i>Streptococcus</i>    | <i>dysgalactiae</i> subsp equisimilis ATCC12394                 | 2.16 | 305 | TransportDB |
| Bacteria | <i>Streptococcus</i>    | <i>dysgalactiae</i> subsp equisimilis GGS_124                   | 2.11 | 312 | TransportDB |
| Bacteria | <i>Streptococcus</i>    | <i>dysgalactiae</i> subsp equisimilis RE378                     | 2.15 | 315 | TransportDB |
| Bacteria | <i>Synechococcus</i>    | <i>elongatus</i> PCC6301                                        | 2.7  | 225 | TransportDB |
| Bacteria | <i>Synechococcus</i>    | <i>elongatus</i> PCC7942                                        | 2.74 | 228 | TransportDB |
| Bacteria | <i>Salmonella</i>       | <i>enterica arizonae</i> sv 62:z4.z23 RSK2980                   | 4.6  | 555 | TransportDB |
| Bacteria | <i>Salmonella</i>       | <i>enterica</i> subsp arizonae serovar62                        | 4.6  | 576 | TransportDB |
| Bacteria | <i>Salmonella</i>       | <i>enterica</i> subsp enterica serovar4512                      | 4.82 | 615 | TransportDB |
| Bacteria | <i>Salmonella</i>       | <i>enterica</i> subsp entericaserovar Agona str 24249           | 4.76 | 595 | TransportDB |
| Bacteria | <i>Salmonella</i>       | <i>enterica</i> subsp entericaserovar Agona str SL483           | 4.84 | 596 | TransportDB |
| Bacteria | <i>Salmonella</i>       | <i>enterica</i> subsp entericaserovar Bareilly str CFSAN000189  | 4.81 | 625 | TransportDB |
| Bacteria | <i>Salmonella</i>       | <i>enterica</i> subsp entericaserovar Bovismorbificans str 3114 | 4.77 | 613 | TransportDB |
| Bacteria | <i>Salmonella</i>       | <i>enterica</i> subsp entericaserovar Choleraesuis str SCB67    | 4.94 | 594 | TransportDB |

|          |                   |                                                                                |      |     |             |
|----------|-------------------|--------------------------------------------------------------------------------|------|-----|-------------|
| Bacteria | <i>Salmonella</i> | <i>enterica</i> subsp <i>enterica</i> serovar Cubana str CFSAN002050           | 5.27 | 631 | TransportDB |
| Bacteria | <i>Salmonella</i> | <i>enterica</i> subsp <i>enterica</i> serovar Dublin str CT_02021853           | 4.92 | 585 | TransportDB |
| Bacteria | <i>Salmonella</i> | <i>enterica</i> subsp <i>enterica</i> serovar Enteritidis str P125109          | 4.69 | 599 | TransportDB |
| Bacteria | <i>Salmonella</i> | <i>enterica</i> subsp <i>enterica</i> serovar Gallinarumpullorum str CDC198367 | 4.62 | 565 | TransportDB |
| Bacteria | <i>Salmonella</i> | <i>enterica</i> subsp <i>enterica</i> serovar Gallinarumpullorum str RKS5078   | 4.64 | 552 | TransportDB |
| Bacteria | <i>Salmonella</i> | <i>enterica</i> subsp <i>enterica</i> serovar Gallinarum str 28791             | 4.66 | 558 | TransportDB |
| Bacteria | <i>Salmonella</i> | <i>enterica</i> subsp <i>enterica</i> serovar Heidelberg str 41578             | 4.95 | 636 | TransportDB |
| Bacteria | <i>Salmonella</i> | <i>enterica</i> subsp <i>enterica</i> serovar Heidelberg str B182              | 4.79 | 619 | TransportDB |
| Bacteria | <i>Salmonella</i> | <i>enterica</i> subsp <i>enterica</i> serovar Heidelberg str CFSAN002069       | 4.93 | 632 | TransportDB |
| Bacteria | <i>Salmonella</i> | <i>enterica</i> subsp <i>enterica</i> serovar Heidelberg str SL476             | 4.98 | 616 | TransportDB |
| Bacteria | <i>Salmonella</i> | <i>enterica</i> subsp <i>enterica</i> serovar Javiana str CFSAN001992          | 4.68 | 611 | TransportDB |
| Bacteria | <i>Salmonella</i> | <i>enterica</i> subsp <i>enterica</i> serovar Newport str SL254                | 5.01 | 621 | TransportDB |
| Bacteria | <i>Salmonella</i> | <i>enterica</i> subsp <i>enterica</i> serovar Newport str USMARCS31241         | 4.92 | 624 | TransportDB |
| Bacteria | <i>Salmonella</i> | <i>enterica</i> subsp <i>enterica</i> serovar ParatyphiA str AKU_12601         | 4.58 | 558 | TransportDB |
| Bacteria | <i>Salmonella</i> | <i>enterica</i> subsp <i>enterica</i> serovar ParatyphiA str ATCC9150          | 4.59 | 560 | TransportDB |
| Bacteria | <i>Salmonella</i> | <i>enterica</i> subsp <i>enterica</i> serovar ParatyphiB str SPB7              | 4.86 | 627 | TransportDB |
| Bacteria | <i>Salmonella</i> | <i>enterica</i> subsp <i>enterica</i> serovar ParatyphiC strain RKS4594        | 4.89 | 593 | TransportDB |
| Bacteria | <i>Salmonella</i> | <i>enterica</i> subsp <i>enterica</i> serovar Pullorum str S06004              | 4.68 | 529 | TransportDB |
| Bacteria | <i>Salmonella</i> | <i>enterica</i> subsp <i>enterica</i> serovar Schwarzengrund str CVM19633      | 4.82 | 598 | TransportDB |
| Bacteria | <i>Salmonella</i> | <i>enterica</i> subsp <i>enterica</i> serovar Thompson str                     | 4.71 | 619 | TransportDB |

|          |                       |                                                                                       |      |     |             |
|----------|-----------------------|---------------------------------------------------------------------------------------|------|-----|-------------|
|          |                       | RM6836                                                                                |      |     |             |
| Bacteria | <i>Salmonella</i>     | <i>enterica</i> subsp <i>enterica</i><br>serovar Typhimurium str<br>14028S            | 4.96 | 620 | TransportDB |
| Bacteria | <i>Salmonella</i>     | <i>enterica</i> subsp <i>enterica</i><br>serovar Typhimurium str 798                  | 4.97 | 625 | TransportDB |
| Bacteria | <i>Salmonella</i>     | <i>enterica</i> subsp <i>enterica</i><br>serovar Typhimurium str<br>D23580            | 4.88 | 613 | TransportDB |
| Bacteria | <i>Salmonella</i>     | <i>enterica</i> subsp <i>enterica</i><br>serovar Typhimurium str<br>DT104             | 5.03 | 628 | TransportDB |
| Bacteria | <i>Salmonella</i>     | <i>enterica</i> subsp <i>enterica</i><br>serovar Typhimurium str DT2                  | 4.81 | 604 | TransportDB |
| Bacteria | <i>Salmonella</i>     | <i>enterica</i> subsp <i>enterica</i><br>serovar Typhimurium str LT2                  | 4.95 | 627 | TransportDB |
| Bacteria | <i>Salmonella</i>     | <i>enterica</i> subsp <i>enterica</i><br>serovar Typhimurium str<br>SL1344            | 5.07 | 631 | TransportDB |
| Bacteria | <i>Salmonella</i>     | <i>enterica</i> subsp <i>enterica</i><br>serovar Typhimurium str<br>ST474             | 5.07 | 631 | TransportDB |
| Bacteria | <i>Salmonella</i>     | <i>enterica</i> subsp <i>enterica</i><br>serovar Typhimurium str<br>T000240           | 5.07 | 651 | TransportDB |
| Bacteria | <i>Salmonella</i>     | <i>enterica</i> subsp <i>enterica</i><br>serovar Typhimurium str U288                 | 5.02 | 638 | TransportDB |
| Bacteria | <i>Salmonella</i>     | <i>enterica</i> subsp <i>enterica</i><br>serovar Typhimurium str UK1                  | 4.91 | 625 | TransportDB |
| Bacteria | <i>Salmonella</i>     | <i>enterica</i> subsp <i>enterica</i><br>serovar Typhimurium var 5 str<br>CFSAN001921 | 5.09 | 633 | TransportDB |
| Bacteria | <i>Salmonella</i>     | <i>enterica</i> subsp <i>enterica</i><br>serovar Typhi str CT18                       | 5.13 | 574 | TransportDB |
| Bacteria | <i>Salmonella</i>     | <i>enterica</i> subsp <i>enterica</i><br>serovar Typhi str Pstx12                     | 4.95 | 596 | TransportDB |
| Bacteria | <i>Salmonella</i>     | <i>enterica</i> subsp <i>enterica</i><br>serovar Typhi str Ty2                        | 4.79 | 568 | TransportDB |
| Bacteria | <i>Salmonella</i>     | <i>enterica</i> subsp <i>enterica</i><br>serovar Typhi str Ty21a                      | 4.79 | 584 | TransportDB |
| Bacteria | <i>Salmonella</i>     | <i>enterica</i> subsp <i>enterica</i><br>serovar Weltevreden str<br>20076032891       | 4.92 | 606 | TransportDB |
| Bacteria | <i>Salmonella</i>     | <i>enterica</i> sv Paratyphi B SPB7                                                   | 4.8  | 608 | TransportDB |
| Bacteria | <i>Staphylococcus</i> | <i>epidermidis</i> ATCC12228                                                          | 2.56 | 322 | TransportDB |
| Bacteria | <i>Staphylococcus</i> | <i>epidermidis</i> RP62A                                                              | 2.64 | 311 | TransportDB |
| Bacteria | <i>Streptococcus</i>  | <i>equi</i> subsp <i>equi</i> 4047                                                    | 2.25 | 246 | TransportDB |

|          |                          |                                                              |       |     |             |
|----------|--------------------------|--------------------------------------------------------------|-------|-----|-------------|
| Bacteria | <i>Streptococcus</i>     | <i>equi</i> subsp <i>zooepidemicus</i>                       | 2.15  | 275 | TransportDB |
| Bacteria | <i>Streptococcus</i>     | <i>equi</i> subsp <i>zooepidemicus</i><br>ATCC35246          | 2.17  | 267 | TransportDB |
| Bacteria | <i>Streptococcus</i>     | <i>equi</i> subsp <i>zooepidemicus</i><br>MGCS10565          | 2.02  | 272 | TransportDB |
| Bacteria | <i>Saccharopolyspora</i> | <i>erythraea</i> NRRL2338                                    | 8.21  | 694 | TransportDB |
| Bacteria | <i>Saccharothrix</i>     | <i>espanaensis</i> DSM44229                                  | 9.36  | 712 | TransportDB |
| Bacteria | <i>Streptomyces</i>      | <i>flavogriseus</i> ATCC33331                                | 7.66  | 704 | TransportDB |
| Bacteria | <i>Shigella</i>          | <i>flexneri</i> 2002017                                      | 4.89  | 533 | TransportDB |
| Bacteria | <i>Shigella</i>          | <i>flexneri</i> 2a str 2457T                                 | 4.6   | 514 | TransportDB |
| Bacteria | <i>Shigella</i>          | <i>flexneri</i> 2a str 301                                   | 4.83  | 536 | TransportDB |
| Bacteria | <i>Shigella</i>          | <i>flexneri</i> 5 str 8401                                   | 4.57  | 524 | TransportDB |
| Bacteria | <i>Sinorhizobium</i>     | <i>fredii</i> HH103                                          | 7.81  | 896 | TransportDB |
| Bacteria | <i>Sinorhizobium</i>     | <i>fredii</i> NGR234                                         | 6.89  | 926 | TransportDB |
| Bacteria | <i>Sinorhizobium</i>     | <i>fredii</i> USDA257                                        | 7.03  | 935 | TransportDB |
| Bacteria | <i>Shewanella</i>        | <i>frigidimarina</i> NCIMB400                                | 4.85  | 376 | TransportDB |
| Bacteria | <i>Streptomyces</i>      | <i>fulvissimus</i> DSM40593                                  | 7.91  | 729 | TransportDB |
| Bacteria | <i>Syntrophobacter</i>   | <i>fumaroxidans</i> MPOB                                     | 4.99  | 413 | TransportDB |
| Bacteria | <i>Streptococcus</i>     | <i>gallolyticus</i> subsp <i>gallolyticus</i><br>ATCC43143   | 2.36  | 333 | TransportDB |
| Bacteria | <i>Streptococcus</i>     | <i>gallolyticus</i> subsp <i>gallolyticus</i><br>ATCCBAA2069 | 2.38  | 349 | TransportDB |
| Bacteria | <i>Streptococcus</i>     | <i>gallolyticus</i> UCN34                                    | 2.35  | 343 | TransportDB |
| Bacteria | <i>Sphaerochaeta</i>     | <i>globus</i> str Buddy                                      | 3.32  | 529 | TransportDB |
| Bacteria | <i>Sodalis</i>           | <i>glossinidius</i> str <i>morsitans</i>                     | 4.29  | 273 | TransportDB |
| Bacteria | <i>Syntrophobotulus</i>  | <i>glycolicus</i> DSM8271                                    | 3.41  | 374 | TransportDB |
| Bacteria | <i>Streptococcus</i>     | <i>gordonii</i> str Challissub str CH1                       | 2.20  | 294 | TransportDB |
| Bacteria | <i>Saprospira</i>        | <i>grandis</i> str Lewin                                     | 4.4   | 147 | TransportDB |
| Bacteria | <i>Streptomyces</i>      | <i>griseus</i> subsp <i>griseus</i><br>NBRC13350             | 8.55  | 785 | TransportDB |
| Bacteria | <i>Staphylococcus</i>    | <i>haemolyticus</i> JCSC1435                                 | 2.7   | 341 | TransportDB |
| Bacteria | <i>Shewanella</i>        | <i>halifaxensis</i> HAWEB4                                   | 5.23  | 436 | TransportDB |
| Bacteria | <i>Slackia</i>           | <i>heliotrinireducens</i> DSM20476                           | 3.17  | 231 | TransportDB |
| Bacteria | <i>Streptomyces</i>      | <i>hygroscopicus</i> subsp<br><i>jinggagensis</i> 5008       | 10.38 | 783 | TransportDB |
| Bacteria | <i>Streptomyces</i>      | <i>hygroscopicus</i> subsp<br><i>jinggagensis</i> TL01       | 10.08 | 768 | TransportDB |
| Bacteria | <i>Streptococcus</i>     | <i>infantarius</i> subsp <i>infantarius</i><br>CJ18          | 2.01  | 266 | TransportDB |
| Bacteria | <i>Streptococcus</i>     | <i>iniae</i> SF1                                             | 2.15  | 298 | TransportDB |
| Bacteria | <i>Streptococcus</i>     | <i>intermedius</i> B196                                      | 2.0   | 267 | TransportDB |
| Bacteria | <i>Streptococcus</i>     | <i>intermedius</i> C270                                      | 1.96  | 258 | TransportDB |
| Bacteria | <i>Streptococcus</i>     | <i>intermedius</i> JTH08                                     | 1.93  | 270 | TransportDB |
| Bacteria | <i>Sanguibacter</i>      | <i>keddieii</i> DSM10542                                     | 4.25  | 549 | TransportDB |
| Bacteria | <i>Sulfuricurvum</i>     | <i>kujiense</i> DSM16994                                     | 2.82  | 192 | TransportDB |
| Bacteria | <i>Strawberry</i>        | <i>lethal yellows phytoplasma</i><br>CPA str NZSb11          | 0.96  | 52  | TransportDB |
| Bacteria | <i>Spirosoma</i>         | <i>linguale</i> DSM74                                        | 8.49  | 394 | TransportDB |

|          |                         |                                |      |      |             |
|----------|-------------------------|--------------------------------|------|------|-------------|
| Bacteria | <i>Syntrophothermus</i> | <i>lipocalidus</i> DSM12680    | 2.41 | 178  | TransportDB |
| Bacteria | <i>Serratia</i>         | <i>liquefaciens</i> ATCC27592  | 5.28 | 787  | TransportDB |
| Bacteria | <i>Sideroxydans</i>     | <i>lithotrophicus</i> ES1      | 3.0  | 234  | TransportDB |
| Bacteria | <i>Shewanella</i>       | <i>loihica</i> PV4             | 4.6  | 347  | TransportDB |
| Bacteria | <i>Staphylococcus</i>   | <i>lugdunensis</i> HKU0901     | 2.66 | 380  | TransportDB |
| Bacteria | <i>Staphylococcus</i>   | <i>lugdunensis</i> N920143     | 2.6  | 354  | TransportDB |
| Bacteria | <i>Streptococcus</i>    | <i>lutetiensis</i> 033         | 1.98 | 248  | TransportDB |
| Bacteria | <i>Streptococcus</i>    | <i>macedonicus</i> ACADC198    | 2.14 | 295  | TransportDB |
| Bacteria | <i>Stenotrophomonas</i> | <i>maltophilia</i> D457        | 4.77 | 357  | TransportDB |
| Bacteria | <i>Stenotrophomonas</i> | <i>maltophilia</i> JV3         | 4.54 | 350  | TransportDB |
| Bacteria | <i>Stenotrophomonas</i> | <i>maltophilia</i> K279a       | 4.85 | 358  | TransportDB |
| Bacteria | <i>Stenotrophomonas</i> | <i>maltophilia</i> R5513       | 4.57 | 351  | TransportDB |
| Bacteria | <i>Serratia</i>         | <i>marcescens</i> FGI94        | 4.86 | 638  | TransportDB |
| Bacteria | <i>Serratia</i>         | <i>marcescens</i> WW4          | 5.24 | 748  | TransportDB |
| Bacteria | <i>Sinorhizobium</i>    | <i>medicae</i> WSM419          | 6.82 | 1013 | TransportDB |
| Bacteria | <i>Sinorhizobium</i>    | <i>meliloti</i> 1021           | 6.69 | 1024 | TransportDB |
| Bacteria | <i>Sinorhizobium</i>    | <i>meliloti</i> 2011           | 6.69 | 1023 | TransportDB |
| Bacteria | <i>Sinorhizobium</i>    | <i>meliloti</i> AK83           | 7.14 | 971  | TransportDB |
| Bacteria | <i>Sinorhizobium</i>    | <i>meliloti</i> BL225C         | 6.98 | 1023 | TransportDB |
| Bacteria | <i>Sinorhizobium</i>    | <i>meliloti</i> GR4            | 7.14 | 1027 | TransportDB |
| Bacteria | <i>Sinorhizobium</i>    | <i>meliloti</i> Rm41           | 7.15 | 1105 | TransportDB |
| Bacteria | <i>Sinorhizobium</i>    | <i>meliloti</i> SM11           | 7.17 | 1024 | TransportDB |
| Bacteria | <i>Streptococcus</i>    | <i>mitis</i> B6                | 2.15 | 269  | TransportDB |
| Bacteria | <i>Streptobacillus</i>  | <i>moniliformis</i> DSM12112   | 1.67 | 229  | TransportDB |
| Bacteria | <i>Streptococcus</i>    | <i>mutans</i> GS5              | 2.03 | 268  | TransportDB |
| Bacteria | <i>Streptococcus</i>    | <i>mutans</i> LJ23             | 2.02 | 269  | TransportDB |
| Bacteria | <i>Streptococcus</i>    | <i>mutans</i> NN2025           | 2.01 | 280  | TransportDB |
| Bacteria | <i>Streptococcus</i>    | <i>mutans</i> UA159            | 2.03 | 279  | TransportDB |
| Bacteria | <i>Stackebrandtia</i>   | <i>nassauensis</i> DSM44728    | 6.84 | 671  | TransportDB |
| Bacteria | <i>Simkania</i>         | <i>negevensis</i> Z            | 2.63 | 204  | TransportDB |
| Bacteria | <i>Starkeya</i>         | <i>novella</i> DSM506          | 4.77 | 701  | TransportDB |
| Bacteria | <i>Streptococcus</i>    | <i>oligofermentans</i> AS13089 | 2.14 | 235  | TransportDB |
| Bacteria | <i>Shewanella</i>       | <i>oneidensis</i> MR1          | 5.13 | 366  | TransportDB |
| Bacteria | <i>Streptococcus</i>    | <i>oralis</i> Uo5              | 1.96 | 239  | TransportDB |
| Bacteria | <i>Streptococcus</i>    | <i>parasanguinis</i> ATCC15912 | 2.15 | 294  | TransportDB |
| Bacteria | <i>Streptococcus</i>    | <i>parasanguinis</i> FW213     | 2.17 | 292  | TransportDB |
| Bacteria | <i>Streptococcus</i>    | <i>parauberis</i> KCTC11537    | 2.14 | 304  | TransportDB |
| Bacteria | <i>Staphylococcus</i>   | <i>pasteuri</i> SP1            | 2.56 | 329  | TransportDB |
| Bacteria | <i>Streptococcus</i>    | <i>pasteurianus</i> ATCC43144  | 2.1  | 308  | TransportDB |
| Bacteria | <i>Shewanella</i>       | <i>pealeana</i> ATCC700345     | 5.17 | 427  | TransportDB |
| Bacteria | <i>Shewanella</i>       | <i>piezotolerans</i> WP3       | 5.4  | 394  | TransportDB |
| Bacteria | <i>Sphaerochaeta</i>    | <i>pleomorpha</i> str Grapes   | 3.59 | 636  | TransportDB |
| Bacteria | <i>Serratia</i>         | <i>plymuthica</i> 4Rx13        | 5.4  | 794  | TransportDB |
| Bacteria | <i>Serratia</i>         | <i>plymuthica</i> AS9          | 5.44 | 783  | TransportDB |
| Bacteria | <i>Serratia</i>         | <i>plymuthica</i> S13          | 5.47 | 804  | TransportDB |
| Bacteria | <i>Streptococcus</i>    | <i>pneumoniae</i> 6706B        | 2.24 | 329  | TransportDB |
| Bacteria | <i>Streptococcus</i>    | <i>pneumoniae</i> 70585        | 2.18 | 314  | TransportDB |
| Bacteria | <i>Streptococcus</i>    | <i>pneumoniae</i> A026         | 2.09 | 302  | TransportDB |

|          |                       |                                 |      |     |             |
|----------|-----------------------|---------------------------------|------|-----|-------------|
| Bacteria | <i>Streptococcus</i>  | <i>pneumoniae</i> AP200         | 2.13 | 321 | TransportDB |
| Bacteria | <i>Streptococcus</i>  | <i>pneumoniae</i> ATCC700669    | 2.22 | 315 | TransportDB |
| Bacteria | <i>Streptococcus</i>  | <i>pneumoniae</i> CGSP14        | 2.21 | 329 | TransportDB |
| Bacteria | <i>Streptococcus</i>  | <i>pneumoniae</i> D39           | 2.05 | 304 | TransportDB |
| Bacteria | <i>Streptococcus</i>  | <i>pneumoniae</i> G54           | 2.08 | 322 | TransportDB |
| Bacteria | <i>Streptococcus</i>  | <i>pneumoniae</i> gamPNI0373    | 2.06 | 318 | TransportDB |
| Bacteria | <i>Streptococcus</i>  | <i>pneumoniae</i> Hungary19A6   | 2.25 | 306 | TransportDB |
| Bacteria | <i>Streptococcus</i>  | <i>pneumoniae</i> INV104        | 2.14 | 304 | TransportDB |
| Bacteria | <i>Streptococcus</i>  | <i>pneumoniae</i> INV200        | 2.09 | 311 | TransportDB |
| Bacteria | <i>Streptococcus</i>  | <i>pneumoniae</i> JJA           | 2.12 | 300 | TransportDB |
| Bacteria | <i>Streptococcus</i>  | <i>pneumoniae</i> OXC141        | 2.04 | 296 | TransportDB |
| Bacteria | <i>Streptococcus</i>  | <i>pneumoniae</i> P1031         | 2.11 | 298 | TransportDB |
| Bacteria | <i>Streptococcus</i>  | <i>pneumoniae</i> R6            | 2.04 | 316 | TransportDB |
| Bacteria | <i>Streptococcus</i>  | <i>pneumoniae</i> SPN034156     | 2.02 | 295 | TransportDB |
| Bacteria | <i>Streptococcus</i>  | <i>pneumoniae</i> SPN034183     | 2.04 | 291 | TransportDB |
| Bacteria | <i>Streptococcus</i>  | <i>pneumoniae</i> SPN994038     | 2.03 | 292 | TransportDB |
| Bacteria | <i>Streptococcus</i>  | <i>pneumoniae</i> SPN994039     | 2.03 | 292 | TransportDB |
| Bacteria | <i>Streptococcus</i>  | <i>pneumoniae</i> SPNA45        | 2.13 | 276 | TransportDB |
| Bacteria | <i>Streptococcus</i>  | <i>pneumoniae</i> ST556         | 2.15 | 313 | TransportDB |
| Bacteria | <i>Streptococcus</i>  | <i>pneumoniae</i> Taiwan19F14   | 2.11 | 298 | TransportDB |
| Bacteria | <i>Streptococcus</i>  | <i>pneumoniae</i> TCH843119A    | 2.09 | 314 | TransportDB |
| Bacteria | <i>Streptococcus</i>  | <i>pneumoniae</i> TIGR4         | 2.16 | 309 | TransportDB |
| Bacteria | <i>Silicibacter</i>   | <i>pomeroyi</i> DSS-3           | 4.11 | 620 | TransportDB |
| Bacteria | <i>Serratia</i>       | <i>proteamaculans</i> 568       | 5.5  | 794 | TransportDB |
| Bacteria | <i>Staphylococcus</i> | <i>pseudintermedius</i> ED99    | 2.57 | 331 | TransportDB |
| Bacteria | <i>Staphylococcus</i> | <i>pseudintermedius</i> HKU1003 | 2.62 | 337 | TransportDB |
| Bacteria | <i>Streptococcus</i>  | <i>pseudopneumoniae</i> IS7493  | 2.2  | 289 | TransportDB |
| Bacteria | <i>Shewanella</i>     | <i>putrefaciens</i> 200         | 4.84 | 371 | TransportDB |
| Bacteria | <i>Shewanella</i>     | <i>putrefaciens</i> CN32        | 4.66 | 395 | TransportDB |
| Bacteria | <i>Streptococcus</i>  | <i>pyogenes</i> A20             | 1.84 | 238 | TransportDB |
| Bacteria | <i>Streptococcus</i>  | <i>pyogenes</i> Alab49          | 1.83 | 236 | TransportDB |
| Bacteria | <i>Streptococcus</i>  | <i>pyogenes</i> HSC5            | 1.82 | 235 | TransportDB |
| Bacteria | <i>Streptococcus</i>  | <i>pyogenes</i> M1476           | 1.83 | 250 | TransportDB |
| Bacteria | <i>Streptococcus</i>  | <i>pyogenes</i> M1GAS           | 1.85 | 235 | TransportDB |
| Bacteria | <i>Streptococcus</i>  | <i>pyogenes</i> MGAS10270       | 1.93 | 245 | TransportDB |
| Bacteria | <i>Streptococcus</i>  | <i>pyogenes</i> MGAS10394       | 1.9  | 235 | TransportDB |
| Bacteria | <i>Streptococcus</i>  | <i>pyogenes</i> MGAS10750       | 1.94 | 244 | TransportDB |
| Bacteria | <i>Streptococcus</i>  | <i>pyogenes</i> MGAS15252       | 1.75 | 233 | TransportDB |
| Bacteria | <i>Streptococcus</i>  | <i>pyogenes</i> MGAS1882        | 1.78 | 233 | TransportDB |
| Bacteria | <i>Streptococcus</i>  | <i>pyogenes</i> MGAS2096        | 1.86 | 252 | TransportDB |
| Bacteria | <i>Streptococcus</i>  | <i>pyogenes</i> MGAS315         | 1.9  | 236 | TransportDB |
| Bacteria | <i>Streptococcus</i>  | <i>pyogenes</i> MGAS5005        | 1.84 | 243 | TransportDB |
| Bacteria | <i>Streptococcus</i>  | <i>pyogenes</i> MGAS6180        | 1.9  | 241 | TransportDB |
| Bacteria | <i>Streptococcus</i>  | <i>pyogenes</i> MGAS8232        | 1.9  | 232 | TransportDB |
| Bacteria | <i>Streptococcus</i>  | <i>pyogenes</i> MGAS9429        | 1.84 | 237 | TransportDB |
| Bacteria | <i>Streptococcus</i>  | <i>pyogenes</i> NZ131           | 1.82 | 233 | TransportDB |
| Bacteria | <i>Streptococcus</i>  | <i>pyogenes</i> SS11            | 1.89 | 232 | TransportDB |
| Bacteria | <i>Streptococcus</i>  | <i>pyogenes</i> str Manfredo    | 1.84 | 232 | TransportDB |

|          |                          |                                                              |       |     |             |
|----------|--------------------------|--------------------------------------------------------------|-------|-----|-------------|
| Bacteria | <i>Streptomyces</i>      | <i>rapamycinicus</i> NRRL5491                                | 12.7  | 986 | TransportDB |
| Bacteria | <i>Streptosporangium</i> | <i>roseum</i> DSM43021                                       | 10.37 | 891 | TransportDB |
| Bacteria | <i>Segniliparus</i>      | <i>rotundus</i> DSM44985                                     | 3.16  | 220 | TransportDB |
| Bacteria | <i>Salinibacter</i>      | <i>ruber</i> DSM13855                                        | 3.59  | 223 | TransportDB |
| Bacteria | <i>Salinibacter</i>      | <i>ruber</i> M8                                              | 3.83  | 97  | TransportDB |
| Bacteria | <i>Selenomonas</i>       | <i>ruminantium</i> subsp <i>lactilytica</i><br>TAM6421       | 3.63  | 321 | TransportDB |
| Bacteria | <i>Spiribacter</i>       | <i>salinus</i> M1940                                         | 1.74  | 217 | TransportDB |
| Bacteria | <i>Streptococcus</i>     | <i>salivarius</i> CCHSS3                                     | 2.22  | 294 | TransportDB |
| Bacteria | <i>Streptococcus</i>     | <i>salivarius</i> JIM8777                                    | 2.21  | 276 | TransportDB |
| Bacteria | <i>Streptococcus</i>     | <i>sanguinis</i> SK36                                        | 2.39  | 303 | TransportDB |
| Bacteria | <i>Staphylococcus</i>    | <i>saprophyticus</i> subsp<br><i>saprophyticus</i> ATCC15305 | 2.58  | 381 | TransportDB |
| Bacteria | <i>Streptomyces</i>      | <i>scabiei</i> 8722                                          | 10.15 | 775 | TransportDB |
| Bacteria | <i>Shewanella</i>        | <i>sediminis</i> HAWEB3                                      | 5.52  | 458 | TransportDB |
| Bacteria | <i>Solibacillus</i>      | <i>silvestris</i> StLB046                                    | 3.98  | 471 | TransportDB |
| Bacteria | <i>Spirochaeta</i>       | <i>smaragdinae</i> DSM11293                                  | 4.65  | 747 | TransportDB |
| Bacteria | <i>Shigella</i>          | <i>sonnei</i> 53G                                            | 5.22  | 601 | TransportDB |
| Bacteria | <i>Shigella</i>          | <i>sonnei</i> Ss046                                          | 5.06  | 540 | TransportDB |
| Bacteria | <i>Sphingobacterium</i>  | <i>s21</i>                                                   | 6.23  | 354 | TransportDB |
| Bacteria | <i>Shewanella</i>        | <i>sANA3</i>                                                 | 5.25  | 396 | TransportDB |
| Bacteria | <i>Serratia</i>          | <i>sAS12</i>                                                 | 5.44  | 783 | TransportDB |
| Bacteria | <i>Serratia</i>          | <i>sAS13</i>                                                 | 5.44  | 782 | TransportDB |
| Bacteria | <i>Serratia</i>          | <i>sATCC39006</i>                                            | 4.95  | 730 | TransportDB |
| Bacteria | <i>Synechococcus</i>     | <i>sCC9311</i>                                               | 2.61  | 199 | TransportDB |
| Bacteria | <i>Synechococcus</i>     | <i>sCC9605</i>                                               | 2.51  | 169 | TransportDB |
| Bacteria | <i>Synechococcus</i>     | <i>sCC9902</i>                                               | 2.23  | 152 | TransportDB |
| Bacteria | <i>Streptococcus</i>     | <i>sIG2</i>                                                  | 1.99  | 256 | TransportDB |
| Bacteria | <i>Streptococcus</i>     | <i>sIP16</i>                                                 | 2.02  | 272 | TransportDB |
| Bacteria | <i>Synechococcus</i>     | <i>sJA23Ba213</i>                                            | 3.05  | 245 | TransportDB |
| Bacteria | <i>Synechococcus</i>     | <i>sJA33Ab</i>                                               | 2.93  | 223 | TransportDB |
| Bacteria | <i>Spirochaeta</i>       | <i>sL21RPulD2</i>                                            | 3.78  | 370 | TransportDB |
| Bacteria | <i>Sphingomonas</i>      | <i>sMM1</i>                                                  | 4.63  | 315 | TransportDB |
| Bacteria | <i>Shewanella</i>        | <i>sMR4</i>                                                  | 4.71  | 371 | TransportDB |
| Bacteria | <i>Shewanella</i>        | <i>sMR7</i>                                                  | 4.8   | 370 | TransportDB |
| Bacteria | <i>Sulfurovum</i>        | <i>sNBC371</i>                                               | 2.56  | 182 | TransportDB |
| Bacteria | <i>Streptomyces</i>      | <i>sPAMC26508</i>                                            | 7.63  | 706 | TransportDB |
| Bacteria | <i>Synechococcus</i>     | <i>sPCC6312</i>                                              | 3.72  | 278 | TransportDB |
| Bacteria | <i>Synechocystis</i>     | <i>sPCC6803</i>                                              | 3.95  | 297 | TransportDB |
| Bacteria | <i>Synechocystis</i>     | <i>sPCC6803</i> sub str GTI                                  | 3.57  | 290 | TransportDB |
| Bacteria | <i>Synechocystis</i>     | <i>sPCC6803</i> sub str PCCN                                 | 3.57  | 290 | TransportDB |
| Bacteria | <i>Synechocystis</i>     | <i>sPCC6803</i> sub str PCCP                                 | 3.57  | 290 | TransportDB |
| Bacteria | <i>Synechococcus</i>     | <i>sPCC7002</i>                                              | 3.41  | 275 | TransportDB |
| Bacteria | <i>Synechococcus</i>     | <i>sPCC7502</i>                                              | 3.58  | 256 | TransportDB |
| Bacteria | <i>Synechococcus</i>     | <i>sRCC307</i>                                               | 2.22  | 171 | TransportDB |
| Bacteria | <i>Streptomyces</i>      | <i>sSirexAAE</i>                                             | 7.41  | 707 | TransportDB |
| Bacteria | <i>Sphingobium</i>       | <i>sSYK6</i>                                                 | 4.35  | 295 | TransportDB |
| Bacteria | <i>Silicibacter</i>      | <i>sTM1040</i>                                               | 3.2   | 501 | TransportDB |

|          |                             |                                   |       |     |             |
|----------|-----------------------------|-----------------------------------|-------|-----|-------------|
| Bacteria | <i>Spiribacter</i>          | <i>sUAHSP71</i>                   | 1.93  | 250 | TransportDB |
| Bacteria | <i>Shewanella</i>           | <i>sW3181</i>                     | 4.71  | 384 | TransportDB |
| Bacteria | <i>Synechococcus</i>        | <i>sWH7803</i>                    | 2.37  | 204 | TransportDB |
| Bacteria | <i>Synechococcus</i>        | <i>sWH8102</i>                    | 2.43  | 172 | TransportDB |
| Bacteria | <i>Sulfurihydrogenibium</i> | <i>sYO3AOP1</i>                   | 1.84  | 120 | TransportDB |
| Bacteria | <i>Selenomonas</i>          | <i>sputigena ATCC35185</i>        | 2.57  | 243 | TransportDB |
| Bacteria | <i>Streptococcus</i>        | <i>suis 05ZYH33</i>               | 2.1   | 294 | TransportDB |
| Bacteria | <i>Streptococcus</i>        | <i>suis 98HAH33</i>               | 2.1   | 279 | TransportDB |
| Bacteria | <i>Streptococcus</i>        | <i>suis A7</i>                    | 2.04  | 261 | TransportDB |
| Bacteria | <i>Streptococcus</i>        | <i>suis BM407</i>                 | 2.17  | 262 | TransportDB |
| Bacteria | <i>Streptococcus</i>        | <i>suis D12</i>                   | 2.18  | 260 | TransportDB |
| Bacteria | <i>Streptococcus</i>        | <i>suis D9</i>                    | 2.18  | 266 | TransportDB |
| Bacteria | <i>Streptococcus</i>        | <i>suis GZ1</i>                   | 2.04  | 261 | TransportDB |
| Bacteria | <i>Streptococcus</i>        | <i>suis JS14</i>                  | 2.14  | 267 | TransportDB |
| Bacteria | <i>Streptococcus</i>        | <i>suis P17</i>                   | 2.01  | 253 | TransportDB |
| Bacteria | <i>Streptococcus</i>        | <i>suis S735</i>                  | 1.98  | 258 | TransportDB |
| Bacteria | <i>Streptococcus</i>        | <i>suis SC070731</i>              | 2.14  | 270 | TransportDB |
| Bacteria | <i>Streptococcus</i>        | <i>suis SC84</i>                  | 2.1   | 260 | TransportDB |
| Bacteria | <i>Streptococcus</i>        | <i>suis SS12</i>                  | 2.1   | 261 | TransportDB |
| Bacteria | <i>Streptococcus</i>        | <i>suis ST1</i>                   | 2.03  | 241 | TransportDB |
| Bacteria | <i>Streptococcus</i>        | <i>suis ST3</i>                   | 2.03  | 256 | TransportDB |
| Bacteria | <i>Streptococcus</i>        | <i>suis T15</i>                   | 2.24  | 266 | TransportDB |
| Bacteria | <i>Streptococcus</i>        | <i>suis TL13</i>                  | 2.04  | 245 | TransportDB |
| Bacteria | <i>Streptococcus</i>        | <i>suis YB51</i>                  | 2.04  | 265 | TransportDB |
| Bacteria | <i>Serratia</i>             | <i>symbiotica str Cinaracedri</i> | 1.76  | 74  | TransportDB |
| Bacteria | <i>Spiroplasma</i>          | <i>syrphidicola EA1</i>           | 1.11  | 114 | TransportDB |
| Bacteria | <i>Spiroplasma</i>          | <i>taiwanense CT1</i>             | 1.09  | 94  | TransportDB |
| Bacteria | <i>Sebaldella</i>           | <i>termitidis ATCC33386</i>       | 4.49  | 501 | TransportDB |
| Bacteria | <i>Spirochaeta</i>          | <i>thermophila DSM6192</i>        | 2.47  | 261 | TransportDB |
| Bacteria | <i>Spirochaeta</i>          | <i>thermophila DSM6578</i>        | 2.56  | 274 | TransportDB |
| Bacteria | <i>Symbiobacterium</i>      | <i>thermophilum IAM14863</i>      | 3.57  | 423 | TransportDB |
| Bacteria | <i>Streptococcus</i>        | <i>thermophilus CNRZ1066</i>      | 1.8   | 269 | TransportDB |
| Bacteria | <i>Sphaerobacter</i>        | <i>thermophilus DSM20745</i>      | 3.99  | 405 | TransportDB |
| Bacteria | <i>Streptococcus</i>        | <i>thermophilus JIM8232</i>       | 1.93  | 264 | TransportDB |
| Bacteria | <i>Streptococcus</i>        | <i>thermophilus LMD9</i>          | 1.86  | 217 | TransportDB |
| Bacteria | <i>Streptococcus</i>        | <i>thermophilus LMG18311</i>      | 1.8   | 266 | TransportDB |
| Bacteria | <i>Streptococcus</i>        | <i>thermophilus MNZLW002</i>      | 1.85  | 248 | TransportDB |
| Bacteria | <i>Streptococcus</i>        | <i>thermophilus ND03</i>          | 1.83  | 245 | TransportDB |
| Bacteria | <i>Salinispora</i>          | <i>tropica CNB440</i>             | 5.18  | 413 | TransportDB |
| Bacteria | <i>Streptococcus</i>        | <i>uberis 0140J</i>               | 1.85  | 270 | TransportDB |
| Bacteria | <i>Solibacter</i>           | <i>usitatus Ellin6076</i>         | 9.97  | 495 | TransportDB |
| Bacteria | <i>Streptomyces</i>         | <i>venezuelae ATCC10712</i>       | 8.23  | 761 | TransportDB |
| Bacteria | <i>Shewanella</i>           | <i>violacea DSS12</i>             | 4.96  | 361 | TransportDB |
| Bacteria | <i>Streptomyces</i>         | <i>violaceusniger Tu4113</i>      | 11.14 | 815 | TransportDB |
| Bacteria | <i>Saccharomonospora</i>    | <i>viridis DSM43017</i>           | 4.31  | 369 | TransportDB |
| Bacteria | <i>Staphylococcus</i>       | <i>warneri SG1</i>                | 2.56  | 332 | TransportDB |
| Bacteria | <i>Sphingomonas</i>         | <i>wittichii RW1</i>              | 5.92  | 325 | TransportDB |

|          |                               |                                                    |      |     |             |
|----------|-------------------------------|----------------------------------------------------|------|-----|-------------|
| Bacteria | <i>Syntrophomonas</i>         | <i>wolfei</i> subsp <i>wolfeistr</i><br>Goettingen | 2.94 | 208 | TransportDB |
| Bacteria | <i>Shewanella</i>             | <i>woodyi</i> ATCC51908                            | 5.94 | 430 | TransportDB |
| Bacteria | <i>Tepidanaerobacter</i>      | <i>acetatoxydans</i> Re1                           | 2.76 | 347 | TransportDB |
| Bacteria | <i>Thermanaerovibrio</i>      | <i>acidaminovorans</i> DSM6589                     | 1.85 | 200 | TransportDB |
| Bacteria | <i>Thermosipho</i>            | <i>africanus</i> TCF52B                            | 2.02 | 235 | TransportDB |
| Bacteria | <i>Thermocrinis</i>           | <i>albus</i> DSM14484                              | 1.5  | 115 | TransportDB |
| Bacteria | <i>Thermovibrio</i>           | <i>ammonificans</i> HB1                            | 1.76 | 121 | TransportDB |
| Bacteria | <i>Taylorella</i>             | <i>asinigenitalis</i> 1445                         | 1.54 | 178 | TransportDB |
| Bacteria | <i>Taylorella</i>             | <i>asinigenitalis</i> MCE3                         | 1.64 | 184 | TransportDB |
| Bacteria | <i>Tolumonas</i>              | <i>auensis</i> DSM9187                             | 3.47 | 428 | TransportDB |
| Bacteria | <i>Treponema</i>              | <i>azotonutricium</i> ZAS9                         | 3.86 | 411 | TransportDB |
| Bacteria | <i>Thermobispora</i>          | <i>bispora</i> DSM43833                            | 4.19 | 368 | TransportDB |
| Bacteria | <i>Treponema</i>              | <i>brennaborensis</i> DSM12168                     | 3.06 | 328 | TransportDB |
| Bacteria | <i>Thermoanaerobacter</i>     | <i>brockii</i> subsp <i>finnii</i> Ako1            | 2.34 | 259 | TransportDB |
| Bacteria | <i>Thermobacillus</i>         | <i>composti</i> KWC4                               | 4.36 | 544 | TransportDB |
| Bacteria | <i>Thiomicrospira</i>         | <i>crunogena</i> XCL2                              | 2.43 | 225 | TransportDB |
| Bacteria | <i>Thermomonospora</i>        | <i>curvata</i> DSM43183                            | 5.64 | 384 | TransportDB |
| Bacteria | <i>Thioalkalimicrobium</i>    | <i>cyclicum</i> ALM1                               | 1.93 | 140 | TransportDB |
| Bacteria | <i>Thiobacillus</i>           | <i>denitrificans</i> ATCC25259                     | 2.91 | 233 | TransportDB |
| Bacteria | <i>Treponema</i>              | <i>denticola</i> ATCC35405                         | 2.84 | 336 | TransportDB |
| Bacteria | <i>Thermosynechococcus</i>    | <i>elongatus</i> BP1                               | 2.59 | 215 | TransportDB |
| Bacteria | <i>Taylorella</i>             | <i>equigenitalis</i> 1456                          | 1.65 | 194 | TransportDB |
| Bacteria | <i>Taylorella</i>             | <i>equigenitalis</i> ATCC35865                     | 1.73 | 197 | TransportDB |
| Bacteria | <i>Taylorella</i>             | <i>equigenitalis</i> MCE9                          | 1.7  | 197 | TransportDB |
| Bacteria | <i>Trichodesmium</i>          | <i>erythraeum</i> IMS101                           | 7.75 | 252 | TransportDB |
| Bacteria | <i>Thermoanaerobacter</i>     | <i>ethanolicus</i> X514                            | 2.46 | 289 | TransportDB |
| Bacteria | <i>Tannerella</i>             | <i>forsythia</i> ATCC43037                         | 3.41 | 157 | TransportDB |
| Bacteria | <i>Thermobifida</i>           | <i>fusca</i> YX                                    | 3.64 | 272 | TransportDB |
| Bacteria | <i>Thermodesulfobacterium</i> | <i>geofontis</i> OPF15                             | 1.63 | 123 | TransportDB |
| Bacteria | <i>Tetragenococcus</i>        | <i>halophilus</i> NBRC12172                        | 2.56 | 378 | TransportDB |
| Bacteria | <i>Thermodesulfatator</i>     | <i>indicus</i> DSM15286                            | 2.32 | 208 | TransportDB |
| Bacteria | <i>Thiomonas</i>              | <i>intermedia</i> K12                              | 3.46 | 360 | TransportDB |
| Bacteria | <i>Thermoanaerobacter</i>     | <i>italicus</i> Ab9                                | 2.45 | 275 | TransportDB |
| Bacteria | <i>Thermotoga</i>             | <i>lettingae</i> TMO                               | 2.14 | 396 | TransportDB |
| Bacteria | <i>Thermovirga</i>            | <i>lienii</i> DSM17291                             | 2.0  | 257 | TransportDB |
| Bacteria | <i>Thermaerobacter</i>        | <i>marianensis</i> DSM12885                        | 2.84 | 298 | TransportDB |
| Bacteria | <i>Thermotoga</i>             | <i>maritima</i> MSB8                               | 1.86 | 268 | TransportDB |
| Bacteria | <i>Thermoanaerobacter</i>     | <i>mathranii</i> subsp <i>mathranii</i> str<br>A3  | 2.31 | 272 | TransportDB |
| Bacteria | <i>Thermosipho</i>            | <i>melanesiensis</i> BI429                         | 1.92 | 207 | TransportDB |
| Bacteria | <i>Thioflavococcus</i>        | <i>mobilis</i> 8321                                | 4.14 | 296 | TransportDB |
| Bacteria | <i>Tistrella</i>              | <i>mobilis</i> KA081020065                         | 6.51 | 973 | TransportDB |
| Bacteria | <i>Thermotoga</i>             | <i>naphthophila</i> RKU10                          | 1.81 | 256 | TransportDB |
| Bacteria | <i>Thermodesulfobium</i>      | <i>narugense</i> DSM14796                          | 1.9  | 165 | TransportDB |
| Bacteria | <i>Thermotoga</i>             | <i>neapolitana</i> DSM4359                         | 1.88 | 308 | TransportDB |
| Bacteria | <i>Thioalkalivibrio</i>       | <i>nitratireducens</i> DSM14787                    | 4.0  | 267 | TransportDB |
| Bacteria | <i>Thermosediminibacter</i>   | <i>oceanii</i> DSM16646                            | 2.28 | 264 | TransportDB |

|          |                            |                                                    |      |     |             |
|----------|----------------------------|----------------------------------------------------|------|-----|-------------|
| Bacteria | <i>Thalassolituus</i>      | <i>oleivorans</i> MIL1                             | 3.92 | 271 | TransportDB |
| Bacteria | <i>Thermus</i>             | <i>oshimai</i> JL2                                 | 2.4  | 279 | TransportDB |
| Bacteria | <i>Treponema</i>           | <i>pallidum</i> str FribourgBlanc                  | 1.14 | 106 | TransportDB |
| Bacteria | <i>Treponema</i>           | <i>pallidum</i> subsp <i>pallidum</i> DAL1         | 1.14 | 107 | TransportDB |
| Bacteria | <i>Treponema</i>           | <i>pallidum</i> subsp <i>pallidum</i> SS14         | 2.28 | 212 | TransportDB |
| Bacteria | <i>Treponema</i>           | <i>pallidum</i> subsp <i>pallidum</i> str Chicago  | 1.14 | 100 | TransportDB |
| Bacteria | <i>Treponema</i>           | <i>pallidum</i> subsp <i>pallidum</i> str MexicoA  | 1.14 | 107 | TransportDB |
| Bacteria | <i>Treponema</i>           | <i>pallidum</i> subsp <i>pallidum</i> str Nichols  | 1.14 | 105 | TransportDB |
| Bacteria | <i>Treponema</i>           | <i>pallidum</i> subsp <i>pertenue</i> str CDC2     | 1.14 | 106 | TransportDB |
| Bacteria | <i>Treponema</i>           | <i>pallidum</i> subsp <i>pertenue</i> str Gauthier | 1.14 | 106 | TransportDB |
| Bacteria | <i>Treponema</i>           | <i>pallidum</i> subsp <i>pertenue</i> str SamoaD   | 1.14 | 106 | TransportDB |
| Bacteria | <i>Treponema</i>           | <i>paraluiscuniculi cuniculi</i> A                 | 1.13 | 109 | TransportDB |
| Bacteria | <i>Turneriella</i>         | <i>parva</i> DSM21527                              | 4.41 | 225 | TransportDB |
| Bacteria | <i>Tsukamurella</i>        | <i>paurometabola</i> DSM20162                      | 4.48 | 440 | TransportDB |
| Bacteria | <i>Treponema</i>           | <i>pedis</i> str TA4                               | 2.89 | 352 | TransportDB |
| Bacteria | <i>Thermotoga</i>          | <i>petrophila</i> RKU1                             | 1.82 | 252 | TransportDB |
| Bacteria | <i>Thermacetogenium</i>    | <i>phaeum</i> DSM12270                             | 2.94 | 247 | TransportDB |
| Bacteria | <i>Thermincola</i>         | <i>potens</i> JR                                   | 3.16 | 273 | TransportDB |
| Bacteria | <i>Treponema</i>           | <i>primitia</i> ZAS2                               | 4.06 | 468 | TransportDB |
| Bacteria | <i>Thermoanaerobacter</i>  | <i>pseudethanolicus</i> ATCC33223                  | 2.36 | 262 | TransportDB |
| Bacteria | <i>Truepera</i>            | <i>radiovictrix</i> DSM17093                       | 3.26 | 416 | TransportDB |
| Bacteria | <i>Thermomicrobium</i>     | <i>roseum</i> DSM5159                              | 2.92 | 284 | TransportDB |
| Bacteria | <i>Terriglobus</i>         | <i>roseus</i> DSM18391                             | 5.23 | 294 | TransportDB |
| Bacteria | <i>Thermus</i>             | <i>scotoductus</i> SA01                            | 2.36 | 282 | TransportDB |
| Bacteria | <i>Thiomonas</i>           | s3As                                               | 3.79 | 371 | TransportDB |
| Bacteria | <i>Thermus</i>             | sCCB_US3_UF1                                       | 2.26 | 279 | TransportDB |
| Bacteria | <i>Thioalkalivibrio</i>    | sK90mix                                            | 2.99 | 222 | TransportDB |
| Bacteria | <i>Thauera</i>             | sMZ1T                                              | 4.57 | 458 | TransportDB |
| Bacteria | <i>Thermosynechococcus</i> | sNK55a                                             | 2.52 | 199 | TransportDB |
| Bacteria | <i>Thermotoga</i>          | sRQ2                                               | 1.88 | 280 | TransportDB |
| Bacteria | <i>Thermoanaerobacter</i>  | sX513                                              | 2.46 | 291 | TransportDB |
| Bacteria | <i>Thermoanaerobacter</i>  | sX514                                              | 2.46 | 289 | TransportDB |
| Bacteria | <i>Treponema</i>           | <i>succinifaciens</i> DSM2489                      | 2.9  | 208 | TransportDB |
| Bacteria | <i>Thioalkalivibrio</i>    | <i>sulfidophilus</i> HLEbGr7                       | 3.46 | 267 | TransportDB |
| Bacteria | <i>Terriglobus</i>         | <i>saanensis</i> SP1PR4                            | 5.1  | 290 | TransportDB |
| Bacteria | <i>Thermoanaerobacter</i>  | <i>tengcongensis</i> MB4                           | 2.69 | 298 | TransportDB |
| Bacteria | <i>Thermobaculum</i>       | <i>terrenum</i> ATCCBAA798                         | 3.1  | 375 | TransportDB |
| Bacteria | <i>Thermotoga</i>          | <i>thermarum</i> DSM5069                           | 2.04 | 288 | TransportDB |
| Bacteria | <i>Thermus</i>             | <i>thermophilus</i> HB27                           | 2.13 | 236 | TransportDB |
| Bacteria | <i>Thermus</i>             | <i>thermophilus</i> HB8                            | 2.12 | 229 | TransportDB |
| Bacteria | <i>Thermus</i>             | <i>thermophilus</i> JL18                           | 2.31 | 278 | TransportDB |

|          |                              |                                              |      |      |             |
|----------|------------------------------|----------------------------------------------|------|------|-------------|
| Bacteria | <i>Thermus</i>               | <i>thermophilus</i> SG05JP1716               | 2.3  | 264  | TransportDB |
| Bacteria | <i>Thermoanaerobacterium</i> | <i>thermosaccharolyticum</i> DSM571          | 2.79 | 300  | TransportDB |
| Bacteria | <i>Thermoanaerobacterium</i> | <i>thermosaccharolyticum</i> M0795           | 2.89 | 325  | TransportDB |
| Bacteria | <i>Teredinibacter</i>        | <i>turnerae</i> T7901                        | 5.19 | 286  | TransportDB |
| Bacteria | <i>Thiocystis</i>            | <i>violascens</i> DSM198                     | 5.02 | 313  | TransportDB |
| Bacteria | <i>Tropheryma</i>            | <i>whipplei</i> str Twist                    | 0.93 | 78   | TransportDB |
| Bacteria | <i>Tropheryma</i>            | <i>whipplei</i> TW0827                       | 0.93 | 78   | TransportDB |
| Bacteria | <i>Thermoanaerobacter</i>    | <i>wiegeli</i> Rt8B1                         | 2.79 | 308  | TransportDB |
| Bacteria | <i>Thermoanaerobacterium</i> | <i>xylanolyticum</i> LX11                    | 2.53 | 272  | TransportDB |
| Bacteria | <i>Thermodesulfovibrio</i>   | <i>yellowstonii</i> DSM11347                 | 2.0  | 166  | TransportDB |
| Bacteria | <i>Ureaplasma</i>            | <i>parvum</i> serovar3 str ATCC27815         | 0.75 | 68   | TransportDB |
| Bacteria | <i>Ureaplasma</i>            | <i>parvum</i> serovar3 str ATCC700970        | 0.75 | 68   | TransportDB |
| Bacteria | <i>Ureaplasma</i>            | <i>urealyticum</i> (parvum) sv 3 ATCC 700970 | 0.75 | 84   | TransportDB |
| Bacteria | <i>Ureaplasma</i>            | <i>urealyticum</i> serovar10 str ATCC33699   | 0.87 | 66   | TransportDB |
| Bacteria | <i>Vibrio</i>                | <i>alginolyticus</i> NBRC15630 ATCC17749     | 5.15 | 590  | TransportDB |
| Bacteria | <i>Vibrio</i>                | <i>anguillarum</i> 775                       | 4.05 | 434  | TransportDB |
| Bacteria | <i>Vibrio</i>                | <i>cholerae</i> IEC224                       | 4.08 | 458  | TransportDB |
| Bacteria | <i>Vibrio</i>                | <i>cholerae</i> LMA39844                     | 3.74 | 431  | TransportDB |
| Bacteria | <i>Vibrio</i>                | <i>cholerae</i> M662                         | 3.94 | 460  | TransportDB |
| Bacteria | <i>Vibrio</i>                | <i>cholerae</i> MJ1236                       | 4.24 | 465  | TransportDB |
| Bacteria | <i>Vibrio</i>                | <i>cholerae</i> O1 biovar El Tor str N16961  | 4.03 | 456  | TransportDB |
| Bacteria | <i>Vibrio</i>                | <i>cholerae</i> O1 str 2010EL1786            | 4.08 | 467  | TransportDB |
| Bacteria | <i>Vibrio</i>                | <i>cholerae</i> O395                         | 4.13 | 466  | TransportDB |
| Bacteria | <i>Verminephrobacter</i>     | <i>eiseniae</i> EF012                        | 5.6  | 1015 | TransportDB |
| Bacteria | <i>Vibrio</i>                | <i>fischeri</i> ES114                        | 4.27 | 482  | TransportDB |
| Bacteria | <i>Vibrio</i>                | <i>fischeri</i> MJ11                         | 4.5  | 482  | TransportDB |
| Bacteria | <i>Vibrio</i>                | <i>furnissii</i> NCTC11218                   | 4.92 | 629  | TransportDB |
| Bacteria | <i>Vibrio</i>                | <i>harveyi</i> ATCCBAA1116                   | 6.06 | 574  | TransportDB |
| Bacteria | <i>Verrucosispora</i>        | <i>maris</i> AB18032                         | 6.73 | 573  | TransportDB |
| Bacteria | <i>Vibrio</i>                | <i>nigripulchritudo</i>                      | 6.32 | 859  | TransportDB |
| Bacteria | <i>Variovorax</i>            | <i>paradoxus</i> B4                          | 7.15 | 1057 | TransportDB |
| Bacteria | <i>Variovorax</i>            | <i>paradoxus</i> EPS                         | 6.55 | 868  | TransportDB |
| Bacteria | <i>Variovorax</i>            | <i>paradoxus</i> S110                        | 6.76 | 949  | TransportDB |
| Bacteria | <i>Vibrio</i>                | <i>parahaemolyticus</i> BB22OP               | 5.1  | 545  | TransportDB |
| Bacteria | <i>Vibrio</i>                | <i>parahaemolyticus</i> RIMD2210633          | 5.17 | 566  | TransportDB |
| Bacteria | <i>Veillonella</i>           | <i>parvula</i> DSM2008                       | 2.13 | 246  | TransportDB |
| Bacteria | <i>Vibrio</i>                | <i>sEJY3</i>                                 | 5.45 | 667  | TransportDB |
| Bacteria | <i>Vibrio</i>                | <i>sEx25</i>                                 | 5.09 | 579  | TransportDB |
| Bacteria | <i>Vibrio</i>                | <i>splendidus</i> LGP32                      | 4.97 | 560  | TransportDB |
| Bacteria | <i>Vibrio</i>                | <i>vulnificus</i> CMCP6                      | 5.13 | 548  | TransportDB |

|          |                       |                                                                                   |      |     |             |
|----------|-----------------------|-----------------------------------------------------------------------------------|------|-----|-------------|
| Bacteria | <i>Vibrio</i>         | <i>vulnificus</i> MO6240                                                          | 5.01 | 538 | TransportDB |
| Bacteria | <i>Vibrio</i>         | <i>vulnificus</i> YJ016                                                           | 5.26 | 560 | TransportDB |
| Bacteria | <i>Waddlia</i>        | <i>chondrophila</i> WSU861044                                                     | 2.13 | 159 | TransportDB |
| Bacteria | <i>Wolbachia</i>      | endosymbiont of <i>Culex quinquefasciatus</i> Pel                                 | 1.48 | 79  | TransportDB |
| Bacteria | <i>Wolbachia</i>      | endosymbiont of <i>Drosophila melanogaster</i>                                    | 1.27 | 83  | TransportDB |
| Bacteria | <i>Wolbachia</i>      | endosymbiont of <i>Drosophila simulans</i> w Ha                                   | 1.3  | 88  | TransportDB |
| Bacteria | <i>Wolbachia</i>      | endosymbiont of <i>Drosophila simulans</i> w No                                   | 1.3  | 80  | TransportDB |
| Bacteria | <i>Wolbachia</i>      | endosymbiont of <i>Onchocerca ochengi</i>                                         | 0.96 | 62  | TransportDB |
| Bacteria | <i>Wolbachia</i>      | endosymbiont strain TRS of <i>Brugiamalayi</i>                                    | 1.08 | 67  | TransportDB |
| Bacteria | <i>Wigglesworthia</i> | <i>glossinidia</i> endosymbiont of <i>Glossina brevipalpis</i>                    | 0.7  | 58  | TransportDB |
| Bacteria | <i>Wigglesworthia</i> | <i>glossinidia</i> endosymbiont of <i>Glossina morsitans</i> morsitans Yalecolony | 0.72 | 57  | TransportDB |
| Bacteria | <i>Weissella</i>      | <i>koreensis</i> KACC15510                                                        | 1.44 | 166 | TransportDB |
| Bacteria | <i>Wolbachia</i>      | <i>pipientis</i> wMel                                                             | 1.27 | 84  | TransportDB |
| Bacteria | <i>Wolbachia</i>      | <i>pipientis</i> wPip                                                             | 1.48 | 86  | TransportDB |
| Bacteria | <i>Wolbachia</i>      | sTRS                                                                              | 1.08 | 71  | TransportDB |
| Bacteria | <i>Wolbachia</i>      | swRI                                                                              | 1.45 | 92  | TransportDB |
| Bacteria | <i>Wolinella</i>      | <i>succinogenes</i> DSM1740                                                       | 2.11 | 236 | TransportDB |
| Bacteria | <i>Weeksella</i>      | <i>virosa</i> DSM16922                                                            | 2.27 | 140 | TransportDB |
| Bacteria | <i>Xanthomonas</i>    | <i>albilineans</i> GPEPC73                                                        | 3.85 | 268 | TransportDB |
| Bacteria | <i>Xanthobacter</i>   | <i>autotrophicus</i> Py2                                                          | 5.63 | 647 | TransportDB |
| Bacteria | <i>Xanthomonas</i>    | <i>axonopodis</i> pv citri str 306                                                | 5.27 | 341 | TransportDB |
| Bacteria | <i>Xanthomonas</i>    | <i>axonopodis</i> pv citrumelo F1                                                 | 4.97 | 326 | TransportDB |
| Bacteria | <i>Xanthomonas</i>    | <i>axonopodis</i> Xac291                                                          | 5.3  | 339 | TransportDB |
| Bacteria | <i>Xenorhabdus</i>    | <i>bovienii</i> SS2004                                                            | 4.23 | 363 | TransportDB |
| Bacteria | <i>Xanthomonas</i>    | <i>campestris</i> pv <i>campestris</i> str 8004                                   | 5.15 | 326 | TransportDB |
| Bacteria | <i>Xanthomonas</i>    | <i>campestris</i> pv <i>campestris</i> str ATCC33913                              | 5.08 | 319 | TransportDB |
| Bacteria | <i>Xanthomonas</i>    | <i>campestris</i> pv <i>campestris</i> str B100                                   | 5.08 | 321 | TransportDB |
| Bacteria | <i>Xanthomonas</i>    | <i>campestris</i> pv raphani756C                                                  | 4.94 | 318 | TransportDB |
| Bacteria | <i>Xanthomonas</i>    | <i>campestris</i> pv vesicatoria str 8510                                         | 5.42 | 339 | TransportDB |
| Bacteria | <i>Xylanimonas</i>    | <i>cellulosilytica</i> DSM15894                                                   | 3.83 | 457 | TransportDB |
| Bacteria | <i>Xanthomonas</i>    | <i>citri</i> subsp <i>citri</i> Aw12879                                           | 5.4  | 335 | TransportDB |
| Bacteria | <i>Xylella</i>        | <i>fastidiosa</i> 9a5c                                                            | 2.73 | 160 | TransportDB |
| Bacteria | <i>Xylella</i>        | <i>fastidiosa</i> M12                                                             | 2.48 | 138 | TransportDB |
| Bacteria | <i>Xylella</i>        | <i>fastidiosa</i> M23                                                             | 2.57 | 147 | TransportDB |
| Bacteria | <i>Xylella</i>        | <i>fastidiosa</i> subsp <i>fastidiosa</i> GB514                                   | 2.52 | 133 | TransportDB |

|          |                     |                                                           |      |     |             |
|----------|---------------------|-----------------------------------------------------------|------|-----|-------------|
| Bacteria | <i>Xylella</i>      | <i>fastidiosa</i> Temecula1                               | 2.52 | 137 | TransportDB |
| Bacteria | <i>Xanthomonas</i>  | <i>fuscans</i> subsp <i>fuscans</i>                       | 5.09 | 334 | TransportDB |
| Bacteria | <i>Xenorhabdus</i>  | <i>nematophila</i> ATCC19061                              | 4.59 | 361 | TransportDB |
| Bacteria | <i>Xanthomonas</i>  | <i>oryzae</i> pv <i>oryzae</i> KACC10331                  | 4.94 | 269 | TransportDB |
| Bacteria | <i>Xanthomonas</i>  | <i>oryzae</i> pv <i>oryzae</i><br>MAFF311018              | 4.94 | 293 | TransportDB |
| Bacteria | <i>Xanthomonas</i>  | <i>oryzae</i> pv <i>oryzae</i> PXO99A                     | 5.24 | 296 | TransportDB |
| Bacteria | <i>Xanthomonas</i>  | <i>oryzae</i> pv <i>oryzicola</i> BLS256                  | 4.83 | 301 | TransportDB |
| Bacteria | <i>Yersinia</i>     | <i>enterocolitica</i> subsp<br><i>enterocolitica</i> 8081 | 4.68 | 635 | TransportDB |
| Bacteria | <i>Yersinia</i>     | <i>enterocolitica</i> subsp<br><i>palaearctica</i> 1055Rr | 4.62 | 634 | TransportDB |
| Bacteria | <i>Yersinia</i>     | <i>enterocolitica</i> subsp<br><i>palaearctica</i> Y11    | 4.63 | 637 | TransportDB |
| Bacteria | <i>Yersinia</i>     | <i>pestis</i> A1122                                       | 4.66 | 598 | TransportDB |
| Bacteria | <i>Yersinia</i>     | <i>pestis</i> Angola                                      | 4.69 | 542 | TransportDB |
| Bacteria | <i>Yersinia</i>     | <i>pestis</i> Antiqua                                     | 4.88 | 630 | TransportDB |
| Bacteria | <i>Yersinia</i>     | <i>pestis</i> biovar <i>Medievalis</i> str<br>Harbin35    | 4.71 | 577 | TransportDB |
| Bacteria | <i>Yersinia</i>     | <i>pestis</i> biovar <i>Microtus</i> str<br>91001         | 4.80 | 603 | TransportDB |
| Bacteria | <i>Yersinia</i>     | <i>pestis</i> CO92                                        | 4.83 | 592 | TransportDB |
| Bacteria | <i>Yersinia</i>     | <i>pestis</i> D106004                                     | 4.81 | 623 | TransportDB |
| Bacteria | <i>Yersinia</i>     | <i>pestis</i> D182038                                     | 4.8  | 612 | TransportDB |
| Bacteria | <i>Yersinia</i>     | <i>pestis</i> KIM10                                       | 4.7  | 591 | TransportDB |
| Bacteria | <i>Yersinia</i>     | <i>pestis</i> Nepal516                                    | 4.65 | 607 | TransportDB |
| Bacteria | <i>Yersinia</i>     | <i>pestis</i> <i>Pestoides</i> F                          | 4.73 | 595 | TransportDB |
| Bacteria | <i>Yersinia</i>     | <i>pestis</i> Z176003                                     | 4.73 | 587 | TransportDB |
| Bacteria | <i>Yersinia</i>     | <i>pseudotuberculosis</i> IP31758                         | 4.94 | 619 | TransportDB |
| Bacteria | <i>Yersinia</i>     | <i>pseudotuberculosis</i><br>IP32953                      | 4.84 | 622 | TransportDB |
| Bacteria | <i>Yersinia</i>     | <i>pseudotuberculosis</i> PB1                             | 4.77 | 614 | TransportDB |
| Bacteria | <i>Yersinia</i>     | <i>pseudotuberculosis</i> YPIII                           | 4.69 | 610 | TransportDB |
| Bacteria | <i>Zobellia</i>     | <i>galactanivorans</i>                                    | 5.52 | 273 | TransportDB |
| Bacteria | <i>Zymomonas</i>    | <i>mobilis</i> subsp <i>mobilis</i><br>ATCC10988          | 2.14 | 165 | TransportDB |
| Bacteria | <i>Zymomonas</i>    | <i>mobilis</i> subsp <i>mobilis</i><br>ATCC29191          | 2.01 | 155 | TransportDB |
| Bacteria | <i>Zymomonas</i>    | <i>mobilis</i> subsp <i>mobilis</i><br>NCIMB11163         | 2.22 | 177 | TransportDB |
| Bacteria | <i>Zymomonas</i>    | <i>mobilis</i> subsp <i>mobilis</i> str<br>CP4NRRLB14023  | 2.16 | 175 | TransportDB |
| Bacteria | <i>Zymomonas</i>    | <i>mobilis</i> subsp <i>mobilis</i><br>ZM4ATCC31821       | 2.06 | 171 | TransportDB |
| Bacteria | <i>Zymomonas</i>    | <i>mobilis</i> subsp <i>pomaceae</i><br>ATCC29192         | 2.06 | 163 | TransportDB |
| Bacteria | <i>Zunongwangia</i> | <i>profunda</i> SMA87                                     | 5.13 | 280 | TransportDB |
|          |                     |                                                           |      |     |             |
|          |                     |                                                           |      |     |             |
